# Supplementary material
Source: PubMed Central journal article supplement (PMC6399738)

## Supporting Information

### **Compound Shape Effects in Minor Groove Binding Affinity and Specificity for Mixed Sequence DNA**

**Pu Guo<sup>1</sup>, Abdelbasset A. Farahat<sup>1,2</sup>, Ananya Paul<sup>1</sup>, Narinder K. Harika<sup>1</sup>, David W. Boykin<sup>1</sup>, W. David Wilson<sup>1\*</sup>**

- 1. Department of Chemistry and Center for Diagnostics and Therapeutics Georgia State University, 50 Decatur St Se, Atlanta, GA 30303, USA.**
- 2. Department of Pharmaceutical Organic Chemistry, Faculty of Pharmacy, Mansoura University, Mansoura 35516, Egypt**

## Table of Contents

|                                                                                                       |                |
|-------------------------------------------------------------------------------------------------------|----------------|
| <b>General Materials and Methods</b>                                                                  | <b>S3-S27</b>  |
| <b>Synthesis</b>                                                                                      | <b>S3-S22</b>  |
| <b>Biophysical Experimental</b>                                                                       | <b>S22-S27</b> |
| <b>Figure S1. Circular dichroism spectra</b>                                                          | <b>S27</b>     |
| <b>Figure S2. Molecular structure with specific atom types used for the DB2708 molecule</b>           | <b>S28</b>     |
| <b>Table S1. Thermal melting studies of DB2457 and analogues with pure AT and mixed DNA sequences</b> | <b>S29</b>     |
| <b>Table S2. Fromod file of the DB2708 molecule</b>                                                   | <b>S30-S33</b> |
| <b>References</b>                                                                                     | <b>S33-S34</b> |
| <b>NMR spectra of Key Intermediates and Final Products</b>                                            | <b>S35-S69</b> |

## General materials and methods

### Synthesis

All commercial reagents were used without further purification. All melting points were determined on a Mel-Temp 3.0 melting point instrument, and are uncorrected. TLC analysis was carried out on silica gel 60 F254 precoated aluminum sheets using UV light for detection. <sup>1</sup>HNMR spectra were recorded on a Bruker 400 MHz spectrometer using the indicated solvents. Mass spectra were obtained from the Georgia State University Mass Spectrometry Laboratory, Atlanta, GA. Elemental analysis were performed by Atlantic Microlab Inc., Norcross, GA.

### Synthesis of 4-Bromo-*N*-alkyl (aryl)-2-nitroaniline (2a-n).

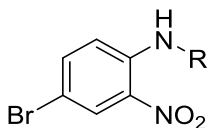

Amines (40 mmol) were added to 4-bromo-1-fluoro-2-nitrobenzene (4.4 g, 20 mmol) in ethanol (20 ml) and stirred at room temperature for 24 h. The reaction mixture was evaporated under vacuum. In case of aromatic amines, Cs<sub>2</sub>CO<sub>3</sub> (6.5 g, 20 mmol) was added to the reaction mixture and heated at 120 °C in DMA (20 ml) for 24 h, ice water was added and the formed solid was filtered and dried. The products resulting from both aromatic and aliphatic amines were chromatographed on silica gel using hexanes/ethyl acetate as solvent.

#### 4-Bromo-*N*-methyl-2-nitroaniline (2a).<sup>1</sup>

#### 4-Bromo-*N*-ethyl-2-nitroaniline (2b).<sup>2</sup>

Orange solid (3.47 g, 71 %), mp 92-93 °C ( reported mp 86-89 °C; <sup>1</sup>HNMR (DMSO-d<sub>6</sub>): δ 8.16 (br s, 1 H), 8.15 (br s, 1 H), 7.64 (dd, *J* = 2, 9.2 Hz, 1 H), 7.03 (d, *J* = 9.2

Hz, 1 H), 3.38 (q,  $J = 6.8$  Hz, 2 H), 1.29 (t,  $J = 7.2$  Hz, 3 H); ESI-HRMS:  $m/z$  calculated for  $C_8H_{10}BrN_2O_2$ : 244.9920, found: 244.9913 ( $M^+ + 1$ ).

**4-Bromo-*N*-isopropyl-2-nitroaniline (2c).**

Orange solid (3.67 g, 72 %), mp 97-98 °C ;  $^1H$ NMR (DMSO- $d_6$ ):  $\delta$  8.15 (br s, 1 H), 7.88 (d,  $J = 7.2$  Hz, 1 H), 7.64 (d,  $J = 9.2$  Hz, 1 H), 7.08 (d,  $J = 9.2$  Hz, 1 H), 3.92 (m, 1 H), 1.25 (d,  $J = 6$  Hz, 6 H); ESI-HRMS:  $m/z$  calculated for  $C_9H_{12}BrN_2O_2$ : 259.077, found: 259.066 ( $M^+ + 1$ ).

**4-Bromo-*N*-isobutyl-2-nitroaniline (2d).**

Orange solid (3.82 g, 70 %), mp 51-52 °C ;  $^1H$ NMR (DMSO- $d_6$ ):  $\delta$  8.20 (br s, 1 H), 8.10 (br s, 1 H), 7.57 (d,  $J = 9.2$  Hz, 1 H), 6.99 (d,  $J = 9.2$  Hz, 1 H), 3.15 (d,  $J = 6$  Hz, 2 H), 1.91 (m, 1 H), 0.93 (d,  $J = 6.4$  Hz, 6 H); ESI-HRMS:  $m/z$  calculated for  $C_{10}H_{13}BrN_2O_2$ : 295.0058, found: 295.0060 ( $M^+ + Na$ ).

**4-Bromo-*N*-neopentyl-2-nitroaniline (2e).**

Orange solid (3.67 g, 64 %), mp 67-68 °C ;  $^1H$ NMR (DMSO- $d_6$ ):  $\delta$  8.19 (t,  $J = 5.6$  Hz, 1 H), 8.16 (d,  $J = 2$  Hz, 1 H), 7.63 (dd,  $J = 2, 9.2$  Hz, 1 H), 7.16 (d,  $J = 9.2$  Hz, 1 H), 3.20 (d,  $J = 5.6$  Hz, 2 H), 0.98 (s, 9 H); ESI-HRMS:  $m/z$  calculated for  $C_{11}H_{16}BrN_2O_2$ : 287.0390, found: 287.0378 ( $M^+ + 1$ ).

**4-Bromo-*N*-butyl-2-nitroaniline (2f).**

Orange oil (3.43 g, 63 %);  $^1H$ NMR (DMSO- $d_6$ ):  $\delta$  8.17 (br s, 1 H), 8.14 (br s, 1 H), 7.63 (d,  $J = 9.2$  Hz, 1 H), 7.04 (d,  $J = 9.2$  Hz, 1 H), 3.35 (m, 2 H), 1.58 (m, 2 H), 1.36 (m, 2 H), 0.91 (t,  $J = 7.2$  Hz, 3 H); ESI-HRMS:  $m/z$  calculated for  $C_{10}H_{14}BrN_2O_2$ : 273.0233, found: 273.0221 ( $M^+ + 1$ ).

**4-Bromo-*N*-(3-Methoxypropyl)-2-nitroaniline (2g).**

Orange oil (4.1 g, 71 %);  $^1H$ NMR (DMSO- $d_6$ ):  $\delta$  8.36 (t,  $J = 5.2$  Hz, 1 H), 8.14 (d,  $J = 2.4$  Hz, 1 H), 7.64 (dd,  $J = 2.4, 9.2$  Hz, 1 H), 7.02 (d,  $J = 9.2$  Hz, 1 H), 3.43 (m, 2 H), 3.37 (m, 2 H), 3.26 (s, 3H), 1.85 (p,  $J = 6$  Hz, 2 H); ESI-HRMS:  $m/z$  calculated for  $C_{10}H_{14}BrN_2O_3$ : 289.0182, found: 289.0169 ( $M^+ + 1$ ).

**4-Bromo-*N*-(2-methoxyethyl)-2-nitroaniline (2h).**

Orange solid (3.68 g, 67 %), mp 73-74 °C ; <sup>1</sup>HNMR (DMSO-d<sub>6</sub>): δ 8.21 (m, 1 H), 8.16 (d, *J* = 2.4 Hz, 1 H), 7.65 (dd, *J* = 2.4, 9.2 Hz, 1 H), 7.09 (d, *J* = 9.2 Hz, 1 H), 3.59 (m, 2 H), 3.52 (m, 2 H), 3.30 (s, 3 H); ESI-HRMS: *m/z* calculated for C<sub>9</sub>H<sub>11</sub>BrN<sub>2</sub>O<sub>3</sub>Na: 296.9851, found: 296.9862 (M<sup>+</sup> + Na).

**4-Bromo-*N*-cyclobutyl-2-nitroaniline (2i).**

Orange solid (4.28 g, 79 %), mp 69-70 °C ; <sup>1</sup>HNMR (DMSO-d<sub>6</sub>): δ 8.14 (t, *J* = 1.2 Hz, 1 H), 8.02 (d, *J* = 6 Hz, 1 H), 7.64 (dd, *J* = 2, 9.2 Hz, 1 H), 6.89 (d, *J* = 9.2 Hz, 1 H), 4.12 (m, 1 H), 2.42 (m, 2 H), 2.01 (m, 2H), 1.77 (m, 2 H); ESI-HRMS: *m/z* calculated for C<sub>10</sub>H<sub>12</sub>BrN<sub>2</sub>O<sub>2</sub>: 277.0077, found: 277.0064 (M<sup>+</sup> + 1).

**4-Bromo-*N*-cyclopentyl-2-nitroaniline (2j).**

Orange solid (3.76 g, 66 %), mp 92-93 °C ; <sup>1</sup>HNMR (DMSO-d<sub>6</sub>): δ 8.13 (br s, 1 H), 7.96 (d, *J* = 6 Hz, 1 H), 7.64 (d, *J* = 9 Hz, 1 H), 7.07 (d, *J* = 9 Hz, 1 H), 4.03 (m, 1 H), 2.05 (m, 2 H), 1.69 (m, 2 H), 1.55 (m, 4 H); ESI-HRMS: *m/z* calculated for C<sub>11</sub>H<sub>14</sub>BrN<sub>2</sub>O<sub>2</sub>: 285.0233, found: 285.0227 (M<sup>+</sup> + 1).

**4-Bromo-*N*-cyclohexyl-2-nitroaniline (2k).<sup>3</sup>**

Orange solid (4.02 g, 67 %), mp 115-116 (reported mp 108.5-109.5 °C); <sup>1</sup>HNMR (DMSO-d<sub>6</sub>): δ 8.15 (t, *J* = 2 Hz, 1 H), 7.98 (d, *J* = 6 Hz, 1 H), 7.62 (dd, *J* = 2, 9.2 Hz, 1 H), 7.12 (d, *J* = 9.2 Hz, 1 H), 3.63 (m, 1 H), 1.93 (m, 2 H), 1.60 (m, 2H), 1.57 (m, 1 H), 1.35 (m, 4 H), 1.25 (m, 1 H); ESI-HRMS: *m/z* calculated for C<sub>12</sub>H<sub>16</sub>BrN<sub>2</sub>O<sub>2</sub>: 299.0390, found: 299.0376 (M<sup>+</sup> + 1).

**4-Bromo-*N*-(cyclopentylmethyl)-2-nitroaniline (2l).**

Orange solid (3.52 g, 59 %), mp 98-99 °C ; <sup>1</sup>HNMR (DMSO-d<sub>6</sub>): δ 8.19 (t, *J* = 5.2 Hz, 1 H), 8.14 (d, *J* = 2 Hz, 1 H), 7.62 (dd, *J* = 2, 9.2 Hz, 1 H), 7.06 (d, *J* = 9.2 Hz, 1 H), 3.26 (t, *J* = 6.4 Hz, 2 H ), 2.21 (m, 1 H), 1.73 (m, 2 H), 1.61 (m, 2 H), 1.53 (m, 2 H), 1.29 (m, 2 H); ESI-HRMS: *m/z* calculated for C<sub>12</sub>H<sub>16</sub>BrN<sub>2</sub>O<sub>2</sub>: 299.0390, found: 299.0396 (M<sup>+</sup> + 1).

#### 4-Bromo-*N*-phenyl-2-nitroaniline (**2m**).<sup>4</sup>

Orange solid (2.98 g, 51 %), mp 73-74 °C (reported mp 65-66 °C) ; <sup>1</sup>HNMR (DMSO-d<sub>6</sub>): δ 9.44 (br s, 1 H), 8.23 (d, *J* = 2.8 Hz, 1 H), 7.63 (dd, *J* = 2.8, 9.2 Hz, 1 H), 7.43 (m, 2 H), 7.32 (d, *J* = 7.6 Hz, 2 H), 7.23 (d, *J* = 7.4 Hz, 1 H), 7.11 (d, *J* = 9.2 Hz, 1 H); ESI-HRMS: *m/z* calculated for C<sub>12</sub>H<sub>10</sub>BrN<sub>2</sub>O<sub>2</sub>: 292.9920, found: 292.9906 (M<sup>+</sup> + 1).

#### 4-Bromo-2-nitro-*N*-(*o*-tolyl)aniline (**2n**).

Orange solid (2.51 g, 41 %), mp 74-75 °C ; <sup>1</sup>HNMR (DMSO-d<sub>6</sub>): δ 9.41 (br s, 1 H), 8.22 (d, *J* = 1.2 Hz, 1 H), 7.57 (d, *J* = 9.2 Hz, 1 H), 7.38 (d, *J* = 6.8 Hz, 1 H), 7.30 (m, 3 H), 6.58 (d, *J* = 9.2 Hz, 1 H), 2.17 (s, 3H).

#### 4'-(alkylamino)-3'-nitro-[1,1'-biphenyl]-4-carbonitrile (**3a-q**).<sup>5-9</sup>

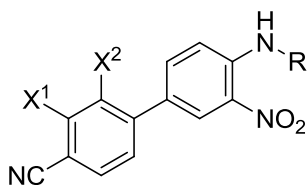

K<sub>2</sub>CO<sub>3</sub> (2.76 g, 20 mmol) in water (5 ml) and 4-cyanophenylboronic acid or its derivatives (11 mmol) methanol (10 ml) were added to a stirred solution of the bromo compound **2** (10 mmol) in dioxane (30 mL) and the mixture was deaerated under nitrogen for 20 min. Tetrakis(triphenyl)phosphine palladium (0.46 g, 0.4 mmol) was added and the reaction mixture was vigorously stirred at 100 °C for 24 h. The solvent was evaporated under reduced pressure, the solid was partitioned between ethyl acetate (200 mL) and 2 M aqueous Na<sub>2</sub>CO<sub>3</sub> (25 mL) containing 5 mL of concentrated ammonia, to remove palladium residues, then washed with water, passed through celite to remove the catalyst, dried (sodium sulfate) and evaporated. The product was purified using column chromatography on silica gel, and hexanes/ethyl acetate as an eluent.

**4'-(Methylamino)-3'-nitro-[1,1'-biphenyl]-4-carbonitrile (3a).<sup>1</sup>**

**4'-(Ethylamino)-3'-nitro-[1,1'-biphenyl]-4-carbonitrile (3b).**

Orange solid (2 g, 78 %), mp 121-122 °C; <sup>1</sup>HNMR (DMSO-d<sub>6</sub>): δ 8.40 (br s, 1 H), 8.26 (br s, 1 H), 7.97 (d, *J* = 8.6 Hz, 1 H), 7.87 (br s, 4 H), 7.17 (d, *J* = 8.6 Hz, 1 H), 3.45 (q, *J* = 6.6 Hz, 2 H), 1.25 (t, *J* = 6.6 Hz, 3 H); ESI-HRMS: *m/z* calculated for C<sub>15</sub>H<sub>14</sub>N<sub>3</sub>O<sub>2</sub>: 268.1081, found: 268.1074 (M<sup>+</sup> + 1).

**4'-(Isopropylamino)-3'-nitro-[1,1'-biphenyl]-4-carbonitrile (3c).**

Orange solid (1.99 g, 71 %), mp 110-111 °C; <sup>1</sup>HNMR (CDCl<sub>3</sub>): δ 8.49 (d, *J* = 2.4 Hz, 1 H), 8.17 (br s, 1H), 7.73 (m, 3 H), 7.67 (d, *J* = 8.4 Hz, 2 H), 7.01 (d, *J* = 9.2 Hz, 1 H), 3.93 (m, 1 H), 1.39 (d, *J* = 6.4 Hz, 6 H); ESI-HRMS: *m/z* calculated for C<sub>16</sub>H<sub>16</sub>N<sub>3</sub>O<sub>2</sub>: 281.1243, found: 281.1250 (M<sup>+</sup> + 1).

**4'-(Isobutylamino)-3'-nitro-[1,1'-biphenyl]-4-carbonitrile (3d).**

Orange solid (2.09 g, 71 %), mp 157-158 °C; <sup>1</sup>HNMR (DMSO-d<sub>6</sub>): δ 8.41 (br s, 1 H), 8.36 (m, 1 H), 7.95 (d, *J* = 9 Hz, 1 H), 7.87 (m, 4H), 7.20 (d, *J* = 9 Hz, 1 H), 3.26 (t, *J* = 6.2 Hz, 2 H), 1.97 (m, 1 H), 0.97 (d, *J* = 6.4 Hz, 6 H); ESI-HRMS: *m/z* calculated for C<sub>17</sub>H<sub>18</sub>N<sub>3</sub>O<sub>2</sub>: 296.1394, found: 296.1380 (M<sup>+</sup> + 1).

**4'-(Neopentylamino)-3'-nitro-[1,1'-biphenyl]-4-carbonitrile (3e).**

Orange solid (2.10 g, 68 %), mp 164-165 °C; <sup>1</sup>HNMR (DMSO-d<sub>6</sub>): δ 8.42 (br s, 1 H), 8.34 (d, *J* = 5.2 Hz, 1 H), 7.97 (d, *J* = 9 Hz, 1 H), 7.89 (m, 4H), 7.30 (d, *J* = 9 Hz, 1 H), 3.27 (d, *J* = 5.6 Hz, 2 H), 1.01 (s, 9 H); ESI-HRMS: *m/z* calculated for C<sub>18</sub>H<sub>20</sub>N<sub>3</sub>O<sub>2</sub>: 310.1550, found: 310.1539 (M<sup>+</sup> + 1).

**4'-(Butylamino)-3'-nitro-[1,1'-biphenyl]-4-carbonitrile (3f).**

Orange solid (2.15 g, 73 %), mp 130-131 °C; <sup>1</sup>HNMR (DMSO-d<sub>6</sub>): δ 8.42 (br s, 1 H), 8.30 (m, 1 H), 7.98 (d, *J* = 9.2 Hz, 1 H), 7.88 (m, 4H), 7.20 (d, *J* = 9.2 Hz, 1 H),

3.43 (m, 2 H), 1.63 (m, 2 H), 1.40 (m,  $J = 7.2$  Hz, 2 H), 0.94 (t,  $J = 7.2$  Hz, 3 H); ESI-HRMS:  $m/z$  calculated for  $C_{17}H_{18}N_3O_2$ : 296.1394, found: 296.1379 ( $M^+ + 1$ ).

**4'-((3-Methoxypropyl)amino)-3'-nitro-[1,1'-biphenyl]-4-carbonitrile (3g).**

Orange solid (2.14 g, 69 %), mp 75-76 °C;  $^1H$ NMR (DMSO- $d_6$ ):  $\delta$  8.46 (t,  $J = 5.4$  Hz, 1 H), 8.40 (d,  $J = 2$  Hz, 1 H), 7.97 (d,  $J = 9.2$  Hz, 1 H), 7.87 (m, 4H), 7.16 (d,  $J = 9.2$  Hz, 1 H), 3.47 (m, 4 H), 3.28 (s, 3 H), 1.88 (m, 2 H); ESI-HRMS:  $m/z$  calculated for  $C_{17}H_{18}N_3O_3$ : 312.1343, found: 312.1320 ( $M^+ + 1$ ).

**4'-((2-Methoxyethyl)amino)-3'-nitro-[1,1'-biphenyl]-4-carbonitrile (3h).**

Orange solid (1.81 g, 61 %), mp 118-119 °C;  $^1H$ NMR (DMSO- $d_6$ ):  $\delta$  8.38 (d,  $J = 1.6$  Hz, 1 H), 8.31 (br s, 1 H), 7.95 (d,  $J = 7.6$  Hz, 1 H), 7.86 (m, 4 H), 7.20 (m, 1 H), 3.59 (m, 4 H), 3.32 (s, 3 H); ESI-HRMS:  $m/z$  calculated for  $C_{16}H_{15}N_3O_3Na$ : 320.1011, found: 320.1001 ( $M^+ + Na$ ).

**4'-(Cyclobutylamino)-3'-nitro-[1,1'-biphenyl]-4-carbonitrile (3i).**

Orange solid (2.31 g, 79 %), mp 159-160 °C;  $^1H$ NMR (DMSO- $d_6$ ):  $\delta$  8.39 (br s, 1 H), 8.14 (d,  $J = 5.2$  Hz, 1 H), 7.95 (d,  $J = 8.6$  Hz, 1 H), 7.87 (m, 4H), 7.03(d,  $J = 8.6$  Hz, 1 H), 4.20 (m, 1 H), 2.46 (m, 2 H), 2.04 (m, 2 H), 1.80 (m, 2 H); ESI-HRMS:  $m/z$  calculated for  $C_{17}H_{16}N_3O_2$ : 294.1237, found: 294.1224 ( $M^+ + 1$ ).

**4'-(Cyclopentylamino)-3'-nitro-[1,1'-biphenyl]-4-carbonitrile (3j).**

Orange solid (2.19 g, 73 %), mp 166-167 °C;  $^1H$ NMR (DMSO- $d_6$ ):  $\delta$  8.40 (br s, 1 H), 8.09 (d,  $J = 6.8$  Hz, 1 H), 7.98 (d,  $J = 8.6$  Hz, 1 H), 7.88 (m, 4H), 7.22 (d,  $J = 8.6$  Hz, 1 H), 4.13 (m, 1 H), 2.09 (m, 2 H), 1.71 (m, 2 H), 1.64 (m, 4 H); ESI-HRMS:  $m/z$  calculated for  $C_{18}H_{17}N_3O_2$ : 307.1315, found: 307.1321 ( $M^+ + 1$ ).

**4'-(Cyclohexylamino)-3'-nitro-[1,1'-biphenyl]-4-carbonitrile (3k).**

Orange solid (2.50 g, 78 %), mp 192-193 °C;  $^1H$ NMR (DMSO- $d_6$ ):  $\delta$  8.42 (br s, 1 H), 8.11 (d,  $J = 7.8$  Hz, 1 H), 7.97 (d,  $J = 9$  Hz, 1 H), 7.89 (m, 4H), 7.26 (d,  $J = 9$  Hz, 1 H), 3.73 (m, 1 H), 1.98 (m, 2 H), 1.70 (m, 2 H), 1.59 (m, 1 H), 1.41 (m, 4H),



1.25 (m, 1H); ESI-HRMS:  $m/z$  calculated for  $C_{19}H_{20}N_3O_2$ : 322.1550, found: 322.1535 ( $M^+ + 1$ ).

**4'-((Cyclopentylmethyl)amino)-3'-nitro-[1,1'-biphenyl]-4-carbonitrile(3l).**

Orange solid (1.89 g, 59 %), mp 181-182 °C;  $^1H$ NMR ( $CDCl_3$ ):  $\delta$  8.49 (d,  $J = 2$  Hz, 1 H), 8.27 (br s, 1 H), 7.76-7.67 (m, 5 H), 7.00 (d,  $J = 9.2$  Hz, 1 H), 3.31 (m, 2 H), 2.32 (m, 1 H), 1.95 (m, 2 H), 1.68 (m, 2 H), 1.38 (m, 2 H), 0.87 (m, 2 H); ESI-HRMS:  $m/z$  calculated for  $C_{19}H_{20}N_3O_2$ : 322.1550, found: 322.1558 ( $M^+ + 1$ ).

**3'-Nitro-4'-(phenylamino)-[1,1'-biphenyl]-4-carbonitrile (3m).**

Orange solid (1.85 g, 59 %), mp 187-188 °C;  $^1H$ NMR ( $DMSO-d_6$ ):  $\delta$  9.56 (br s, 1 H), 8.47 (d,  $J = 2$  Hz, 1 H), 7.94 (dd,  $J = 2, 9.2$  Hz, 1 H), 7.90 (m, 4 H), 7.48 (br s, 1 H), 7.45 (d,  $J = 7.6$  Hz, 1 H), 7.37 (d,  $J = 7.6$  Hz, 2 H), 7.26 (m, 2 H); ESI-HRMS:  $m/z$  calculated for  $C_{19}H_{14}N_3O_2$ : 316.1081, found: 316.1067 ( $M^+ + 1$ ).

**3'-Nitro-4'-(o-tolylamino)-[1,1'-biphenyl]-4-carbonitrile (3n).**

Orange solid (1.80 g, 55 %), mp 157-158 °C;  $^1H$ NMR ( $DMSO-d_6$ ):  $\delta$  9.53 (br s, 1 H), 8.48 (br s, 1 H), 7.88 (m, 5 H), 7.41 (d,  $J = 6.8$  Hz, 1 H), 7.32 (m, 3 H), 7.73 (d,  $J = 8.8$  Hz, 1 H), 2.21 (s, 3 H); ESI-HRMS:  $m/z$  calculated for  $C_{20}H_{16}N_3O_2$ : 330.1237, found: 330.1221 ( $M^+ + 1$ ).

**3-Chloro-4'-(isopropylamino)-3'-nitro-[1,1'-biphenyl]-4-carbonitrile (3o).**

Orange solid (1.73 g, 55 %), mp 146-147 °C;  $^1H$ NMR ( $DMSO-d_6$ ):  $\delta$  8.45 (d,  $J = 2$  Hz, 1 H), 8.07 (br s, 1 H), 8.03 (m, 2 H), 7.98 (d,  $J = 8.4$  Hz, 1 H), 7.85 (d,  $J = 8.4$  Hz, 1 H), 7.21 (d,  $J = 9.2$  Hz, 1 H), 4.04 (m, 1 H), 1.29 (d,  $J = 6$  Hz, 6 H), ESI-HRMS:  $m/z$  calculated for  $C_{16}H_{15}ClN_3O_2$ : 316.0847, found: 316.0833 ( $M^+ + 1$ ).

**4'-(Isopropylamino)-3'-nitro-3-(trifluoromethyl)-[1,1'-biphenyl]-4-carbonitrile (3p).**

Orange solid (1.77 g, 51 %), mp 141-142 °C;  $^1H$ NMR ( $DMSO-d_6$ ):  $\delta$  8.53 (d,  $J = 2$  Hz, 1 H), 8.23 (br s, 1 H), 8.22 (m, 2 H), 8.08 (dd,  $J = 2, 9.2$  Hz, 1 H), 8.04 (d,  $J =$

7.6 Hz, 1 H), 7.24 (d,  $J = 9.2$  Hz, 1 H), 4.05 (m, 1 H), 1.30 (d,  $J = 6$  Hz, 6 H), ESI-HRMS:  $m/z$  calculated for  $C_{17}H_{15}F_3N_3O_2$ : 350.1111, found: 350.1102 ( $M^+ + 1$ ).

#### **4'-(Isopropylamino)-2-methyl-3'-nitro-[1,1'-biphenyl]-4-carbonitrile (3q).**

Orange solid (1.79 g, 61 %), mp 135-136 °C;  $^1H$ NMR (DMSO- $d_6$ ):  $\delta$  8.03 (d,  $J = 1.6$  Hz, 1 H), 7.98 (d,  $J = 7.8$  Hz, 1 H), 7.79 (br s, 1 H), 7.71 (d,  $J = 7.8$  Hz, 1 H), 7.62 (dd,  $J = 1.6, 8.8$  Hz, 1 H), 7.44 (d,  $J = 7.6$  Hz, 1 H), 7.19 (d,  $J = 8.8$  Hz, 1 H), 4.01 (m, 1 H), 2.31 (s, 3H), 1.30 (d,  $J = 6.8$  Hz, 6 H), ESI-HRMS:  $m/z$  calculated for  $C_{17}H_{18}N_3O_2$ : 296.1394, found: 296.1379 ( $M^+ + 1$ ).

#### **Synthesis of the diamine (4a-q).**

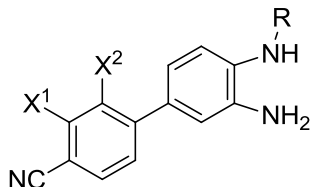

$SnCl_2 \cdot 2H_2O$  (4.5 g, 20 mmol) was added to a suspension of the nitro compound **3** (5 mmol) in Ethanol (30 ml). The reaction mixture was refluxed for 12 h and concentrated under reduced pressure. The formed residue was neutralized by sodium hydroxide solution in an ice bath. The formed precipitate was filtered, dried under vacuum at room temperature and then dissolved in acetone (50 ml) and filtered. The filtrate was evaporated under reduced pressure and dried under vacuum at room temperature and used directly in the next step.

#### **Synthesis of the bisnitrile compounds (6a-t).<sup>10-14</sup>**

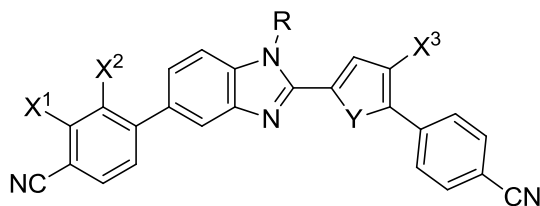

Sodium metabisulphite (1.14 g, 6 mmol) was added to a solution of the diamines **3a-r** (3 mmol) and the aldehydes<sup>15</sup> **5a-d** (3 mmol) in DMSO (10 mL) and the mixture was heated at 130 °C for 30 min. The reaction mixture was poured into water, filtered and dried. Purification was by crystallization from acetone.

**4-(5-(5-(4-Cyanophenyl)-1-methyl-1H-benzo[d]imidazol-2-yl)thiophen-2-yl)benzotrile (6a).**<sup>10</sup>

**4-(5-(5-(4-Cyanophenyl)-1-ethyl-1H-benzo[d]imidazol-2-yl)thiophen-2-yl)benzotrile (6b).**

Yellow solid (0.78 g, 61 %), mp > 300 °C; <sup>1</sup>HNMR (DMSO-d<sub>6</sub>): δ 8.06 (br s, 1 H), 7.97 (m, 9 H), 7.81 (m, 2 H), 7.71 (m, 1 H), 4.60 (br s, 2 H), 1.44 (br s, 3 H); ESI-HRMS: m/z calculated for C<sub>27</sub>H<sub>19</sub>N<sub>4</sub>S: 431.1325, found: 431.1320 (M<sup>+</sup> + 1).

**4-(5-(5-(4-Cyanophenyl)-1-isopropyl-1H-benzo[d]imidazol-2-yl)thiophen-2-yl)benzotrile (6c).**

Yellow solid (0.73 g, 55 %), mp > 300 °C; <sup>1</sup>HNMR (DMSO-d<sub>6</sub>): δ 8.08 (br s, 1 H), 7.98 (m, 3 H), 7.92 (m, 7 H), 7.64 (m, 2 H), 5.18 (m, 1 H), 1.69 (d, *J* = 6.4 Hz, 6 H); ESI-HRMS: m/z calculated for C<sub>28</sub>H<sub>21</sub>N<sub>4</sub>S: 445.1487, found: 445.1494 (M<sup>+</sup> + 1).

**4-(5-(5-(4-Cyanophenyl)-1-isobutyl-1H-benzo[d]imidazol-2-yl)thiophen-2-yl)benzotrile (6d).**

Yellow solid (0.70 gm, 51 %), mp > 300 °C; <sup>1</sup>HNMR (DMSO-d<sub>6</sub>): δ 8.06 (br s, 1 H), 7.95 (m, 8 H), 7.84 (m, 3 H), 7.69 (d, *J* = 7.2 Hz, 1 H), 4.43 (d, *J* = 6.8 Hz, 2 H), 2.17 (m, 1 H), 0.89 (d, *J* = 4.8 Hz, 6 H); ESI-HRMS: m/z calculated for C<sub>29</sub>H<sub>23</sub>N<sub>4</sub>S: 459.1638, found: 459.1615 (M<sup>+</sup> + 1).

**4-(5-(5-(4-Cyanophenyl)-1-neopentyl-1H-benzo[d]imidazol-2-yl)thiophen-2-yl)benzotrile (6e).**

Yellow solid (0.86 gm, 61 %), mp > 300 °C; <sup>1</sup>HNMR (DMSO-d<sub>6</sub>): δ 8.07 (br s, 1 H), 7.96 (m, 4 H), 7.93 (m, 5 H), 7.85 (m, 2 H), 7.68 (d, *J* = 8.4 Hz, 1 H), 4.54 (s, 2

H), 0.83 (s, 9 H); ESI-HRMS: m/z calculated for C<sub>30</sub>H<sub>25</sub>N<sub>4</sub>S: 473.1794, found: 473.1782 (M<sup>+</sup> + 1).

**4-(1-Butyl-2-(5-(4-cyanophenyl)thiophen-2-yl)-1H-benzo[d]imidazol-5-yl)benzotrile (6f).**

Yellow solid (0.70 gm, 51 %), mp > 300 °C; <sup>1</sup>HNMR (DMSO-d<sub>6</sub>): δ 8.06 (br s, 1 H), 7.97 (m, 4 H), 7.93 (m, 4 H), 7.88 (d, J = 4 Hz, 1 H), 7.81 (d, J = 4 Hz, 1 H), 7.79 (br s, 1 H), 7.70 (d, J = 8 Hz, 1 H), 4.56 (t, J = 7.2 Hz, 2 H), 1.79 (m, 2 H), 1.36 (m, 2 H), 0.90 (t, J = 7.2 Hz, 3 H); ESI-HRMS: m/z calculated for C<sub>30</sub>H<sub>25</sub>N<sub>4</sub>S: 459.1638, found: 459.1637 (M<sup>+</sup> + 1).

**4-(5-(5-(4-Cyanophenyl)-1-(3-methoxypropyl)-1H-benzo[d]imidazol-2-yl)thiophen-2-yl)benzotrile (6g).**

Yellow solid (0.69 gm, 49 %), mp > 300 °C; <sup>1</sup>HNMR (DMSO-d<sub>6</sub>): δ 8.05 (br s, 1 H), 7.92 (m, 9 H), 7.71 (m, 3 H), 4.59 (br s, 2 H), 3.36 (br s, 2 H), 3.22 (s, 3 H), 2.06 (br s, 2 H); ESI-HRMS: m/z calculated for C<sub>29</sub>H<sub>23</sub>N<sub>4</sub>OS: 475.1587, found: 475.1567 (M<sup>+</sup> + 1).

**4-(5-(5-(4-Cyanophenyl)-1-(2-methoxyethyl)-1H-benzo[d]imidazol-2-yl)thiophen-2-yl)benzotrile (6h).**

Yellow solid (0.92 gm, 67 %), mp > 300 °C; <sup>1</sup>HNMR (DMSO-d<sub>6</sub>): δ 8.06 (br s, 1H), 7.95 (m, 4 H), 7.92 (m, 4 H), 7.88 (m, 2 H), 7.78 (d, J = 8.8Hz, 1 H), 7.69 (d, J = 8 Hz, 1 H), 4.72 (br s, 2H), 3.81 (br s, 2 H), 3.21 (s, 3 H); ESI-HRMS: m/z calculated for C<sub>28</sub>H<sub>21</sub>N<sub>4</sub>OS: 461.1614, found: 461.1611 (M<sup>+</sup> + 1).

**4-(5-(5-(4-Cyanophenyl)-1-cyclobutyl-1H-benzo[d]imidazol-2-yl)thiophen-2-yl)benzotrile (6i).**

Yellow solid (0.83 gm, 61 %), mp > 300 °C; <sup>1</sup>HNMR (DMSO-d<sub>6</sub>): δ 8.10 (br s, 1 H), 8.02 (d, J = 8.8 Hz, 2 H), 7.97 (m, 3 H), 7.92 (m, 4 H), 7.88 (d, J = 3.7 Hz, 1 H), 7.73 (d, J = 3.7 Hz, 1 H), 7.69 (d, J = 7.6 Hz, 1 H), 5.44 (m, 1 H), 2.84 (m, 2 H),

2.56 (m, 2 H), 1.91 (m, 2 H); ESI-HRMS:  $m/z$  calculated for  $C_{29}H_{21}N_4S$ : 457.1481, found: 457.1469 ( $M^+ + 1$ ).

**4-(5-(5-(4-Cyanophenyl)-1-cyclopentyl-1H-benzo[d]imidazol-2-yl)thiophen-2-yl)benzotrile (6j).**

Yellow solid (0.63 gm, 45 %), mp > 300 °C;  $^1H$ NMR (DMSO- $d_6$ ):  $\delta$  8.09 (br s, 1 H), 7.93 (m, 8 H), 7.83 (m, 2 H), 7.73 (br s, 1 H), 7.65 (br s, 1 H), 5.31 (m, 1 H), 2.23 (m, 4 H), 2.06 (m, 2 H), 1.78 (m, 2 H); ESI-HRMS:  $m/z$  calculated for  $C_{30}H_{23}N_4S$ : 471.1638, found: 471.1630 ( $M^+ + 1$ ).

**4-(5-(5-(4-Cyanophenyl)-1-cyclohexyl-1H-benzo[d]imidazol-2-yl)thiophen-2-yl)benzotrile (6k).**

Yellow solid (0.83 gm, 61 %), mp > 300 °C;  $^1H$ NMR (DMSO- $d_6$ ):  $\delta$  8.07 (d,  $J = 6$  Hz, 1 H), 7.98 (m, 9 H), 7.79 (d,  $J = 8.8$  Hz, 1 H), 7.62 (m, 2 H), 4.69 (m, 1 H), 2.35 (m, 2 H), 1.97 (m, 4 H), 1.69 (m, 1 H), 1.46 (m, 3 H); ESI-HRMS:  $m/z$  calculated for  $C_{29}H_{21}N_4S$ : 485.1784, found: 485.1785 ( $M^+ + 1$ ).

**4-(5-(5-(4-Cyanophenyl)-1-(cyclopentylmethyl)-1H-benzo[d]imidazol-2-yl)thiophen-2-yl)benzotrile (6l).**

Yellow solid (0.58 gm, 40 %), mp > 300 °C;  $^1H$ NMR (DMSO- $d_6$ ):  $\delta$  8.06 (br s, 1 H), 7.96 (m, 3 H), 7.93 (m, 4 H), 7.82 (m, 4 H), 7.69 (d,  $J = 7.2$  Hz, 1 H), 4.55 (d,  $J = 4.8$  Hz, 2 H), 2.38 (m, 1 H), 1.60 (m, 4 H), 1.45 (m, 2 H), 1.29 (m, 2 H); ESI-HRMS:  $m/z$  calculated for  $C_{31}H_{25}N_4S$ : 485.1794, found: 485.1791 ( $M^+ + 1$ ).

**4-(5-(5-(4-Cyanophenyl)-1-phenyl-1H-benzo[d]imidazol-2-yl)thiophen-2-yl)benzotrile (6m).**

Yellow solid (0.71 gm, 50 %), mp > 300 °C;  $^1H$ NMR (DMSO- $d_6$ ):  $\delta$  8.15 (br s, 1 H), 7.93 (m, 4 H), 7.84 (m, 4 H), 7.73 (m, 3 H), 7.65 (m, 4 H), 7.15 (m, 1 H), 6.68 (m, 1 H); ESI-HRMS:  $m/z$  calculated for  $C_{31}H_{19}N_4S$ : 479.1325, found: 479.1314 ( $M^+ + 1$ ).

**4-(5-(5-(4-Cyanophenyl)-1-(o-tolyl)-1H-benzo[d]imidazol-2-yl)thiophen-2-yl)benzotrile (6n).**

Yellow solid (0.60 gm, 41 %), mp > 300 °C; <sup>1</sup>HNMR (DMSO-d<sub>6</sub>): δ 8.17 (br s, 1 H), 7.94 (m, 4 H), 7.89 (d, *J* = 8 Hz, 2 H), 7.83 (d, *J* = 8 Hz, 2 H), 7.62 (m, 4 H), 7.56 (m, 2 H), 7.05 (d, *J* = 8 Hz, 1 H), 6.66 (br s, 1 H), 1.91 (s, 3 H); ESI-HRMS: *m/z* calculated for C<sub>32</sub>H<sub>21</sub>N<sub>4</sub>S: 493.1481, found: 493.1484 (M<sup>+</sup> + 1).

**2-Chloro-4-(2-(5-(4-cyanophenyl)thiophen-2-yl)-1-isopropyl-1H-benzo[d]imidazol-5-yl)benzotrile (6o).**

Yellow solid (0.87 gm, 61 %), mp > 300 °C; <sup>1</sup>HNMR (DMSO-d<sub>6</sub>): δ 8.12 (m, 2H), 8.01 (d, *J* = 8 Hz, 1 H), 7.92 (m, 7 H), 7.65 (m, 2 H), 5.18 (m, 1 H), 1.69 (d, *J* = 6 Hz, 6 H); ESI-HRMS: *m/z* calculated for C<sub>28</sub>H<sub>20</sub>ClN<sub>4</sub>S: 479.1092, found: 479.1086 (M<sup>+</sup> + 1).

**4-(2-(5-(4-Cyanophenyl)thiophen-2-yl)-1-isopropyl-1H-benzo[d]imidazol-5-yl)-2-(trifluoromethyl)benzotrile (6p).**

Yellow solid (0.81 gm, 53 %), mp > 300 °C; <sup>1</sup>HNMR (DMSO-d<sub>6</sub>): δ 8.26 (m, 4H), 7.99 (m, 3 H), 7.94 (d, *J* = 8 Hz, 2 H), 7.89 (d, *J* = 3.6 Hz, 1 H), 7.75 (d, *J* = 8.4 Hz, 1 H), 7.69 (d, *J* = 3.6 Hz, 1 H), 5.20 (m, 1 H), 1.75 (d, *J* = 6.8 Hz, 3 H), 1.71 (d, *J* = 6.8 Hz, 3 H); ESI-HRMS: *m/z* calculated for C<sub>29</sub>H<sub>20</sub>F<sub>3</sub>N<sub>4</sub>S: 513.1355, found: 513.1349 (M<sup>+</sup> + 1).

**4-(2-(5-(4-Cyanophenyl)thiophen-2-yl)-1-isopropyl-1H-benzo[d]imidazol-5-yl)-3-methylbenzotrile (6q).**

Yellow solid (0.85 gm, 62 %), mp > 300 °C; <sup>1</sup>HNMR (DMSO-d<sub>6</sub>): δ 7.99 (d, *J* = 8.4 Hz, 2 H), 7.93 (d, *J* = 8.4 Hz, 2 H), 7.90 (d, *J* = 4 Hz, 1 H), 7.84 (br s, 1 H), 7.81 (br s, 1 H), 7.76 (m, 2 H), 7.66 (d, *J* = 4 Hz, 1 H), 7.52 (d, *J* = 8.2 Hz, 1 H), 7.25 (d, *J* = 8.2 Hz, 1 H), 5.18 (m, 1 H), 2.35 (s, 3 H), 1.69 (d, *J* = 6.8 Hz, 6 H); ESI-HRMS: *m/z* calculated for C<sub>29</sub>H<sub>23</sub>N<sub>4</sub>S: 459.1638, found: 459.1633 (M<sup>+</sup> + 1).

**4-(5-(5-(4-Cyanophenyl)-1-isopropyl-1H-benzo[d]imidazol-2-yl)-3-methylthiophen-2-yl)benzotrile (6r).**

Yellow solid (0.53 gm, 39 %), mp > 300 °C; <sup>1</sup>HNMR (DMSO-d<sub>6</sub>): δ 8.10 (br s, 1 H), 8.00 (m, 3 H), 7.96 (m, 3 H), 7.79 (m, 3 H), 7.64 (d, *J* = 8.4 Hz, 1 H), 7.58 (br s, 1 H), 5.23(m, 1 H), 2.43 (s, 3 H), 1.74 (d, *J* = 6.8 Hz, 6 H); ESI-HRMS: m/z calculated for C<sub>29</sub>H<sub>23</sub>N<sub>4</sub>S: 459.1638, found: 459.1615 (M<sup>+</sup> + 1).

**4-(5-(5-(4-Cyanophenyl)-1-methyl-1H-benzo[d]imidazol-2-yl)selenophen-2-yl)benzotrile (6s).**

Yellow solid (0.84 gm, 61 %), mp > 300 °C; <sup>1</sup>HNMR (DMSO-d<sub>6</sub>): δ 8.05 (m, 3 H), 7.96 (d, *J* = 8 Hz, 2 H), 7.91 (m, 6 H), 7.76 (d, *J* = 8.4 Hz, 1 H), 7.70 (d, *J* = 8.4 Hz, 1 H), 4.09 (s, 3 H).

**4-(5-(5-(4-Cyanophenyl)-1-isopropyl-1H-benzo[d]imidazol-2-yl)selenophen-2-yl)benzotrile (6t).**

Yellow solid (0.75 gm, 51 %), mp > 300 °C; <sup>1</sup>HNMR (DMSO-d<sub>6</sub>): δ 8.08 (br s, 1H), 8.04 (br s, 1 H), 7.95 (m, 9 H), 7.85 (br s, 1 H), 7.65 (d, *J* = 8.4 Hz, 1 H), 5.21 (t, *J* = 5.8 Hz, 1 H), 1.70 (d, *J* = 5.8 Hz, 6 H); ESI-HRMS: m/z calculated for C<sub>28</sub>H<sub>21</sub>N<sub>4</sub>Se: 493.0926, found: 493.0915 (M<sup>+</sup> + 1).

**Synthesis of the diamidines (7a-t).**

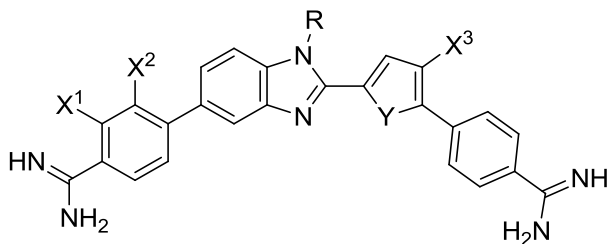

The above bis-nitriles (0.6 mmol) were suspended in freshly distilled THF (5 mL), and treated with a 1M LiN(TMS)<sub>2</sub><sup>16,17</sup> in THF solution (3.6 mL, 3.6 mmol) and the mixture was stirred for 48 h at room temperature. The reaction mixture was cooled to 0 °C and HCl saturated ethanol (3 mL) was added. The mixture was stirred for 4

h, and concentrated under reduced pressure, ether was added and the resultant solid was collected by filtration. The diamidine was purified by neutralization with 1M sodium hydroxide solution followed by filtration of the produced solid, washed with water and dried. The free base was stirred with ethanolic HCl for 24 h. The reaction mixture was concentrated under reduced pressure and acetone was added, the solid that formed was filtered and dried under vacuum at 100 °C for 24 h.

**4-(5-(5-(4-Carbamimidoylphenyl)-1-methyl-1H-benzo[d]imidazol-2-yl)thiophen-2-yl)benzimidamide (7a).**<sup>15</sup>

**4-(5-(5-(4-Carbamimidoylphenyl)-1-ethyl-1H-benzo[d]imidazol-2-yl)thiophen-2-yl)benzimidamide (7b).**

Yellow solid (0.225 gm, 62 %), mp > 300 °C. <sup>1</sup>HNMR (DMSO-d<sub>6</sub>): δ 9.58 (s, 2 H), 9.54 (s, 2 H), 9.36 (s, 2 H), 9.34 (s, 2 H), 8.09 (br s, 1 H), 8.03 (d, *J* = 8.4 Hz, 2H), 8.00 (m, 6 H), 7.94 (d, *J* = 4 Hz, 1H), 7.90 (d, *J* = 4 Hz, 1H), 7.85 (d, *J* = 8.4 Hz, 1H), 7.76 (dd, *J* = 1.2, 8.4 Hz, 1H), 4.61 (m, 2 H), 1.46 (t, *J* = 7 Hz, 3H); ESI-HRMS: *m/z* calculated for C<sub>27</sub>H<sub>26</sub>N<sub>6</sub>S: 233.0964, found: 233.0957 (Double charged amidine base M<sup>+</sup> + 2). Anal. Calcd. For C<sub>27</sub>H<sub>24</sub>N<sub>6</sub>S. 3HCl. 1.75H<sub>2</sub>O: C, 53.67; H, 5.09; N, 13.91. Found: C, 53.69; H, 5.18; N, 13.72.

**4-(5-(5-(4-Carbamimidoylphenyl)-1-isopropyl-1H-benzo[d]imidazol-2-yl)thiophen-2-yl)benzimidamide (7c).**

Yellow solid (0.260 gm, 72 %), mp > 300 °C. <sup>1</sup>HNMR (DMSO-d<sub>6</sub>): δ 9.56 (s, 2 H), 9.51 (s, 2 H), 9.33 (s, 2 H), 9.30 (s, 2 H), 8.13 (s, 1 H), 8.06 (m, 3 H), 8.02 (m, 7 H), 7.79 (d, *J* = 3.2 Hz, 1H), 7.76 (d, *J* = 7.4 Hz, 1H), 5.22 (m, 1H), 1.73 (d, *J* = 6.4 Hz, 6H); ESI-HRMS: *m/z* calculated for C<sub>28</sub>H<sub>27</sub>N<sub>6</sub>S: 479.2018, found: 479.2012 (Amidine base M<sup>+</sup> + 1). Anal. Calcd. For C<sub>28</sub>H<sub>26</sub>N<sub>6</sub>S. 3HCl. 1.5H<sub>2</sub>O: C, 54.79; H, 5.25; N, 13.70. Found: C, 54.91; H, 5.33; N, 13.36.



**4-(5-(5-(4-Carbamimidoylphenyl)-1-isobutyl-1H-benzo[d]imidazol-2-yl)thiophen-2-yl)benzimidamide (7d).**

Yellow solid (0.265 gm, 69 %), mp > 300 °C. <sup>1</sup>HNMR (DMSO-d<sub>6</sub>): δ 9.51 (s, 2 H), 9.47 (s, 2 H), 9.27 (s, 2 H), 9.24 (s, 2 H), 8.11 (s, 1 H), 8.05 (m, 4 H), 7.95 (m, 6H), 7.91 (d, *J* = 9.2 Hz, 1H), 7.78 (d, *J* = 7.2 Hz, 1H), 4.49 (d, *J* = 6.8 Hz, 2H), 2.20 (m, 1 H), 0.92 (d, *J* = 6 Hz, 6H); ESI-HRMS: *m/z* calculated for C<sub>29</sub>H<sub>30</sub>N<sub>6</sub>S: 247.1121, found: 247.1113 (Double charged amidine base M<sup>+</sup> + 2). Anal. Calcd. For C<sub>29</sub>H<sub>28</sub>N<sub>6</sub>S. 3HCl. 2.10H<sub>2</sub>O: C, 54.54; H, 5.56; N, 13.16. Found: C, 54.83; H, 5.69; N, 12.76.

**4-(5-(5-(4-Carbamimidoylphenyl)-1-neopentyl-1H-benzo[d]imidazol-2-yl)thiophen-2-yl)benzimidamide (7e).**

Yellow solid (0.050 gm, 13 %), mp > 300 °C. <sup>1</sup>HNMR (DMSO-d<sub>6</sub>): δ 9.55 (s, 2 H), 9.51 (s, 2 H), 9.33 (s, 2 H), 9.30 (s, 2 H), 8.12 (s, 1 H), 8.04 (m, 5 H), 7.97 (m, 5 H), 7.93 (d, *J* = 3.6 Hz, 1H), 7.81 (d, *J* = 8 Hz, 1H), 4.61 (s, 2H), 0.86 (s, 9H); ESI-HRMS: *m/z* calculated for C<sub>30</sub>H<sub>32</sub>N<sub>6</sub>S: 254.1199, found: 254.1192 (Double charged amidine base M<sup>+</sup> + 2). Anal. Calcd. For C<sub>30</sub>H<sub>30</sub>N<sub>6</sub>S. 3HCl. 3H<sub>2</sub>O: C, 53.87; H, 5.88; N, 12.57. Found: C, 53.50; H, 5.51; N, 12.47.

**4-(5-(5-(4-Carbamimidoylphenyl)-1-butyl-1H-benzo[d]imidazol-2-yl)thiophen-2-yl)benzimidamide (7f).**

Yellow solid (0.300 gm, 77 %), mp > 300 °C. <sup>1</sup>HNMR (DMSO-d<sub>6</sub>): δ 9.57 (s, 2 H), 9.53 (s, 2 H), 9.35 (s, 2 H), 9.32 (s, 2 H), 8.10 (br s, 1 H), 8.05 (d, *J* = 8.8 Hz, 2H), 8.00 (m, 6 H), 7.98 (d, *J* = 6.8 Hz, 2H), 7.93 (d, *J* = 8.8 Hz, 1H), 7.82 (d, *J* = 8.8 Hz, 1H), 4.64 (t, *J* = 6.6 Hz, 2H), 1.83 (t, *J* = 7.4 Hz, 2H), 1.40 (m, 2H), 0.91 (t, *J* = 7.4 Hz, 3H); ESI-HRMS: *m/z* calculated for C<sub>29</sub>H<sub>30</sub>N<sub>6</sub>S: 247.1121, found: 247.1112 (Double charged amidine base M<sup>+</sup> + 2). Anal. Calcd. For C<sub>29</sub>H<sub>28</sub>N<sub>6</sub>S. 3HCl. 2.25H<sub>2</sub>O: C, 54.31; H, 5.58; N, 13.11. Found: C, 53.92; H, 5.48; N, 12.90.

**4-(5-(5-(4-Carbamimidoylphenyl)-1-(3-methoxypropyl)-1H-benzo[d]imidazol-2-yl)thiophen-2-yl)benzimidamide (7g).**

Yellow solid (0.060 gm, 10 %), mp > 300 °C. <sup>1</sup>HNMR (DMSO-d<sub>6</sub>): δ 9.57 (s, 2 H), 9.53 (s, 2 H), 9.35 (s, 2 H), 9.32 (s, 2 H), 8.10 (br s, 1 H), 8.05 (d, *J* = 8.8 Hz, 2H), 8.00 (m, 6 H), 7.98 (d, *J* = 6.8 Hz, 2H), 7.93 (d, *J* = 8.8 Hz, 1H), 7.82 (d, *J* = 8.8 Hz, 1H), 4.68 (t, *J* = 6.4 Hz, 2H), 3.40 (t, *J* = 5.2 Hz, 2H), 3.22 (s, 3H), 2.11 (m, 2H); ESI-HRMS: *m/z* calculated for C<sub>29</sub>H<sub>30</sub>N<sub>6</sub>OS: 255.1095, found: 255.1087 (Double charged amidine base M<sup>+</sup> + 2). Anal. Calcd. For C<sub>29</sub>H<sub>28</sub>N<sub>6</sub>OS. 3HCl. 1.25H<sub>2</sub>O: C, 54.49; H, 5.28; N, 13.15. Found: C, 54.40; H, 5.30; N, 12.97.

**4-(5-(5-(4-Carbamimidoylphenyl)-1-(2-methoxyethyl)-1H-benzo[d]imidazol-2-yl)thiophen-2-yl)benzimidamide (7h).**

Yellow solid (0.260 gm, 68 %), mp > 300 °C. <sup>1</sup>HNMR (DMSO-d<sub>6</sub>): δ 9.55 (s, 2 H), 9.50 (s, 2 H), 9.32 (s, 2 H), 9.29 (s, 2 H), 8.11 (br s, 1 H), 8.04 (m, 5H), 7.99 (m, 3H), 7.95 (m, 2H), 7.89 (d, *J* = 8.8 Hz, 1H), 7.80 (d, *J* = 8.8 Hz, 1H), 4.78 (br s, 2H), 3.85 (t, *J* = 4.8 Hz, 2H), 3.22 (s, 3 H); ESI-HRMS: *m/z* calculated for C<sub>28</sub>H<sub>27</sub>N<sub>6</sub>OS: 495.1967, found: 495.1985 (amidine base M<sup>+</sup> + 1). Anal. Calcd. For C<sub>28</sub>H<sub>26</sub>N<sub>6</sub>OS. 3HCl. 2H<sub>2</sub>O: C, 52.65; H, 5.21; N, 13.16. Found: C, 52.63; H, 5.49; N, 13.00.

**4-(5-(5-(4-Carbamimidoylphenyl)-1-cyclobutyl-1H-benzo[d]imidazol-2-yl)thiophen-2-yl)benzimidamide (7i).**

Yellow solid (0.162 gm, 40 %), mp > 300 °C. <sup>1</sup>HNMR (DMSO-d<sub>6</sub>): δ 9.57 (s, 2 H), 9.54 (s, 2 H), 9.36 (s, 2 H), 9.34 (s, 2 H), 8.15 (br s, 1 H), 8.11 (d, *J* = 8.8 Hz, 1H), 7.05 (d, *J* = 8.4 Hz, 2H), 8.02 (m, 5 H), 7.97 (m, 2H), 7.85 (d, *J* = 3.6 Hz, 1H), 7.81 (d, *J* = 9.2 Hz, 1H), 5.48 (m, 1H), 2.84 (m, 2H), 2.60 (m, 2H), 1.96 (m, 2H); ESI-HRMS: *m/z* calculated for C<sub>29</sub>H<sub>28</sub>N<sub>6</sub>S: 246.1043, found: 246.1035 (Double charged amidine base M<sup>+</sup> + 2). Anal. Calcd. For C<sub>29</sub>H<sub>26</sub>N<sub>6</sub>S. 3HCl. 2H<sub>2</sub>O: C, 54.87; H, 5.24; N, 13.24. Found: C, 54.54; H, 5.12; N, 13.52.

**4-(5-(5-(4-Carbamimidoylphenyl)-1-cyclopentyl-1H-benzo[d]imidazol-2-yl)thiophen-2-yl)benzimidamide (7j).**

Yellow solid (0.200 gm, 53 %), mp > 300 °C. <sup>1</sup>HNMR (DMSO-d<sub>6</sub>): δ 9.57 (s, 2 H), 9.53 (s, 2 H), 9.34 (s, 2 H), 9.31 (s, 2 H), 8.15 (d, *J* = 1.2 Hz, 1 H), 8.06 (d, *J* = 8.4 Hz, 2 H), 8.02 (m, 5 H), 7.97 (m, 2H), 7.85 (m, 2H), 7.77 (d, *J* = 8.8 Hz, 1 H), 5.34 (m, 1H), 2.26 (m, 4H), 2.06 (m, 2H), 1.81 (m, 2H); ESI-HRMS: *m/z* calculated for C<sub>30</sub>H<sub>30</sub>N<sub>6</sub>S: 253.1121, found: 253.1116 (Double charged amidine base M<sup>+</sup> + 2). Anal. Calcd. For C<sub>30</sub>H<sub>28</sub>N<sub>6</sub>S. 3HCl. 2.75H<sub>2</sub>O: C, 54.40; H, 5.55; N, 12.69. Found: C, 54.62; H, 5.42; N, 12.43.

**4-(5-(5-(4-Carbamimidoylphenyl)-1-cyclohexyl-1H-benzo[d]imidazol-2-yl)thiophen-2-yl)benzimidamide (7k).**

Yellow solid (0.230 gm, 58 %), mp > 300 °C. <sup>1</sup>HNMR (DMSO-d<sub>6</sub>): δ 9.61 (s, 2 H), 9.58 (s, 2 H), 9.39 (s, 2 H), 9.37 (s, 2 H), 8.20 (m, 1 H), 8.14 (br s, 1H), 8.07 (m, 3 H), 8.02 (m, 6 H), 7.86 (m, 1H), 7.81 (d, *J* = 8.4 Hz, 1H), 4.77 (m, 1H), 2.37 (m, 2H), 2.08 (m, 2H), 1.91 (m, 2H), 1.71 (m, 1H), 1.49 (m, 3H); ESI-HRMS: *m/z* calculated for C<sub>31</sub>H<sub>32</sub>N<sub>6</sub>S: 260.1199, found: 260.1190 (Double charged amidine base M<sup>+</sup> + 2). Anal. Calcd. For C<sub>31</sub>H<sub>30</sub>N<sub>6</sub>S. 3HCl. 2.5H<sub>2</sub>O: C, 55.42; H, 5.70; N, 12.51. Found: C, 55.17; H, 5.49; N, 12.29.

**4-(5-(5-(4-Carbamimidoylphenyl)-1-(cyclopentylmethyl)-1H-benzo[d]imidazol-2-yl)thiophen-2-yl)benzimidamide (7l).**

Yellow solid (0.300 gm, 74 %), mp > 300 °C. <sup>1</sup>HNMR (DMSO-d<sub>6</sub>): δ 9.60 (s, 2 H), 9.55 (s, 2 H), 9.36 (s, 2 H), 9.34 (s, 2 H), 8.10 (br s, 2 H), 8.06 (m, 2 H), 8.01 (m, 8 H), 7.83 (d, *J* = 8.4 Hz, 1 H), 4.64 (d, *J* = 6.8 Hz, 2 H), 2.41 (m, 1H), 1.63 (m, 4H), 1.47 (m, 2H), 1.33 (m, 2H); ESI-HRMS: *m/z* calculated for C<sub>31</sub>H<sub>30</sub>N<sub>6</sub>S: 260.1199, found: 260.1194 (Double charged amidine base M<sup>+</sup> + 2). Anal. Calcd. For C<sub>31</sub>H<sub>32</sub>N<sub>6</sub>S. 3HCl. 2.75H<sub>2</sub>O: C, 55.05; H, 5.74; N, 12.43. Found: C, 55.09; H, 5.59; N, 12.38.

**4-(5-(5-(4-carbamimidoylphenyl)-1-phenyl-1H-benzo[d]imidazol-2-yl)thiophen-2-yl)benzimidamide (7m).**

Yellow solid (0.225 gm, 66 %), mp > 300 °C. <sup>1</sup>HNMR (DMSO-d<sub>6</sub>): δ 9.48 (s, 4 H), 9.25 (s, 4 H), 8.21 (d, *J* = 1.2 Hz, 1H), 8.02 (d, *J* = 8.8 Hz, 2H), 7.97 (d, *J* = 8.8 Hz, 2H), 7.91 (br s, 4 H), 7.75 (m, 3H), 7.69 (m, 4H), 7.19 (d, *J* = 8.8 Hz, 1H), 6.73 (d, *J* = 3.6 Hz, 1H); ESI-HRMS: *m/z* calculated for C<sub>31</sub>H<sub>26</sub>N<sub>6</sub>S: 257.0964, found: 257.0975 (Double charged amidine base M<sup>+</sup> + 2). Anal. Calcd. For C<sub>31</sub>H<sub>24</sub>N<sub>6</sub>S. 3HCl. 0.5H<sub>2</sub>O: C, 59.13; H, 4.48; N, 13.35. Found: C, 59.01; H, 4.72; N, 13.16.

**4-(5-(5-(4-Carbamidoylphenyl)-1-(*o*-tolyl)-1H-benzo[d]imidazol-2-yl)thiophen-2-yl)benzimidamide (7n).**

Yellow solid (0.165 gm, 42 %), mp > 300 °C. <sup>1</sup>HNMR (DMSO-d<sub>6</sub>): δ 9.52 (s, 4 H), 9.31 (s, 4 H), 8.21 (br s, 1H), 8.01 (m, 4H), 7.93 (d, *J* = 8.2 Hz, 2H), 7.88 (d, *J* = 8.2 Hz, 2H), 7.72 (d, *J* = 8.8 Hz, 1H), 7.65 (m, 3 H), 7.60 (m, 2H), 7.11 (d, *J* = 8.4 Hz, 1H), 7.80 (d, *J* = 3.6 Hz, 1H), 1.95 (s, 3H); ESI-HRMS: *m/z* calculated for C<sub>32</sub>H<sub>28</sub>N<sub>6</sub>S: 264.1043, found: 264.1038 (Double charged amidine base M<sup>+</sup> + 2). Anal. Calcd. For C<sub>32</sub>H<sub>26</sub>N<sub>6</sub>S. 3HCl. 0.5H<sub>2</sub>O: C, 59.70; H, 4.70; N, 13.06. Found: C, 60.02; H, 5.09; N, 13.01.

**4-(2-(5-(4-carbamimidoylphenyl)thiophen-2-yl)-1-isopropyl-1H-benzo[d]imidazol-5-yl)-2-chlorobenzimidamide (7o).**

Yellow solid (0.110 gm, 28%), mp > 300 °C. <sup>1</sup>HNMR (DMSO-d<sub>6</sub>): δ 9.60 (br s, 4 H), 9.33 (br s, 4 H), 8.14 (br s, 1H), 8.07 (m, 4H), 8.00 (m, 2H), 7.98 (d, *J* = 3.2 Hz, 1H), 7.95 (d, *J* = 8.4 Hz, 1H), 7.81 (d, *J* = 3.2 Hz, 1H), 7.76 (m, 2H), 5.22 (m, 1H), 1.73 (d, *J* = 6.8 Hz, 6H); ESI-HRMS: *m/z* calculated for C<sub>28</sub>H<sub>27</sub>ClN<sub>6</sub>S: 257.0848, found: 257.0837 (Double charged amidine base M<sup>+</sup> + 2). Anal. Calcd. For C<sub>28</sub>H<sub>25</sub>ClN<sub>6</sub>S. 3HCl. 2.5H<sub>2</sub>O: C, 50.51; H, 5.00; N, 12.63. Found: C, 50.12; H, 4.75; N, 12.46.

**4-(2-(5-(4-Carbamimidoylphenyl)thiophen-2-yl)-1-isopropyl-1H-benzo[d]imidazol-5-yl)-2-(trifluoromethyl)benzimidamide (7p).**

Yellow solid (0.320 gm, 76 %), mp > 300 °C. <sup>1</sup>HNMR (DMSO-d<sub>6</sub>): δ 9.62 (br s, 4 H), 9.59 (s, 2 H), 9.38 (s, 2 H), 8.26 (br s, 2H), 8.19 (s, 1H), 8.05 (m, 3H), 7.98 (m, 3H), 7.88 (d, *J* = 8.4 Hz, 1H), 7.79 (m, 2H), 5.23 (br s, 1H), 1.73 (d, *J* = 4.8 Hz, 6H); ESI-HRMS: *m/z* calculated for C<sub>29</sub>H<sub>27</sub>F<sub>3</sub>N<sub>6</sub>S: 274.0980, found: 274.0971 (Double charged amidine base M<sup>+</sup> + 2). Anal. Calcd. For C<sub>29</sub>H<sub>25</sub>F<sub>3</sub>N<sub>6</sub>S. 3HCl. 2.5H<sub>2</sub>O: C, 49.77; H, 4.75; N, 12.01. Found: C, 49.72; H, 4.69; N, 11.86.

**4-(2-(5-(4-Carbamimidoylphenyl)thiophen-2-yl)-1-isopropyl-1H-benzo[d]imidazol-5-yl)-3-methylbenzimidamide (7q).**

Yellow solid (0.16 gm, 42 %), mp > 300 °C. <sup>1</sup>HNMR (DMSO-d<sub>6</sub>): δ 9.58 (s, 4 H), 9.40 (s, 4 H), 8.07 (d, *J* = 8.4 Hz, 2H), 8.02 (m, 4H), 7.95 (br s, 1H), 7.91 (m, 2H), 7.86 (d, *J* = 8 Hz, 1H), 7.58 (d, *J* = 8 Hz, 1H), 7.47 (d, *J* = 8.8 Hz, 1H), 5.22 (m, 1H), 2.38 (s, 3H), 1.74 (d, *J* = 6.8 Hz, 6H); ESI-HRMS: *m/z* calculated for C<sub>29</sub>H<sub>30</sub>N<sub>6</sub>S: 247.1121, found: 247.1114 (Double charged amidine base M<sup>+</sup> + 2). Anal. Calcd. For C<sub>29</sub>H<sub>28</sub>N<sub>6</sub>S. 3HCl. 1.5H<sub>2</sub>O: C, 55.48; H, 5.46; N, 13.39. Found: C, 55.45; H, 5.38; N, 13.06.

**4-(5-(5-(4-Carbamimidoylphenyl)-1-isopropyl-1H-benzo[d]imidazol-2-yl)-3-methylthiophen-2-yl)benzimidamide (7r).**

Yellow solid (0.14 gm, 38 %), mp > 300 °C. <sup>1</sup>HNMR (DMSO-d<sub>6</sub>): δ 9.56 (s, 2 H), 9.54 (s, 2 H), 9.36 (s, 2 H), 9.32 (s, 2 H), 8.14 (br s, 1H), 8.07 (d, *J* = 8 Hz, 2H), 8.00 (m, 4H), 7.84 (d, *J* = 8 Hz, 2H), 7.81 (br s, 1H), 7.71 (d, *J* = 8.4 Hz, 1H), 7.64 (br s, 1H), 5.26 (m, 1H), 2.46 (s, 3H), 1.77 (d, *J* = 6.8 Hz, 6H); ESI-HRMS: *m/z* calculated for C<sub>29</sub>H<sub>30</sub>N<sub>6</sub>S: 247.1121, found: 247.1112 (Double charged amidine base M<sup>+</sup> + 2). Anal. Calcd. For C<sub>29</sub>H<sub>28</sub>N<sub>6</sub>S. 3HCl. 1.5H<sub>2</sub>O: C, 55.48; H, 5.46; N, 13.39. Found: C, 55.48; H, 5.52; N, 13.19.

**4-(5-(5-(4-Carbamimidoylphenyl)-1-methyl-1H-benzo[d]imidazol-2-yl)selenophen-2-yl)benzimidamide (7s).**

Yellow solid (0.150 gm, 39 %), mp > 300 °C. <sup>1</sup>HNMR (DMSO-d<sub>6</sub>): δ 9.56 (s, 2 H), 9.52 (s, 2 H), 9.31 (s, 2 H), 9.29 (s, 2 H), 8.24 (d, *J* = 3.6 Hz, 1H), 8.15 (d, *J* = 3.6 Hz, 1H), 8.10 (br s, 1H), 7.99 (m, 9H), 7.85 (d, *J* = 8.8 Hz, 1H), 4.15 (s, 3H); ESI-HRMS: *m/z* calculated for C<sub>26</sub>H<sub>24</sub>N<sub>6</sub>Se: 250.0608, found: 250.0599 (Double charged amidine base M<sup>+</sup> + 2). Anal. Calcd. For C<sub>26</sub>H<sub>22</sub>N<sub>6</sub>Se. 3HCl. 2H<sub>2</sub>O: C, 48.59; H, 4.55; N, 13.08. Found: C, 48.48; H, 4.39; N, 13.10.

**4-(5-(5-(4-Carbamimidoylphenyl)-1-isopropyl-1H-benzo[d]imidazol-2-yl)selenophen-2-yl)benzimidamide (7t).**

Yellow solid (0.325 gm, 79%), mp > 300 °C. <sup>1</sup>HNMR (DMSO-d<sub>6</sub>): δ 9.56 (s, 2 H), 9.53 (s, 2 H), 9.40 (s, 2 H), 9.32 (s, 2 H), 8.11 (m, 3H), 8.09 (m, 9H), 7.79 (d, *J* = 8.4 Hz, 1H), 5.19 (m, 1H), 1.73 (d, *J* = 6.4 Hz, 6H); ESI-HRMS: *m/z* calculated for C<sub>28</sub>H<sub>28</sub>N<sub>6</sub>Se: 264.0765, found: 264.0756 (Double charged amidine base M<sup>+</sup> + 2). Anal. Calcd. For C<sub>28</sub>H<sub>26</sub>N<sub>6</sub>Se. 3HCl. 2.5H<sub>2</sub>O: C, 49.47; H, 5.04; N, 12.37. Found: C, 49.16; H, 5.13; N, 12.12.

## **Biophysical Experimental**

### **Materials**

In the DNA thermal melting (*T<sub>m</sub>*), circular dichroism (CD) experiments, the hairpin oligomer sequences were used as shown in Figure 1. In SPR experiments, 5'-biotin labeled hairpin DNA oligomers were used. All DNA oligomers were obtained from

Integrated DNA Technologies, Inc. (IDT, Coralville, IA) with reverse-phase HPLC purification and mass spectrometry characterization.

The buffer used in  $T_m$  and CD experiments was 50 mM Tris-HCl, 100 mM NaCl, 1 mM EDTA, pH 7.4 (TNE 100). The biosensor-surface plasmon resonance (SPR) experiments were performed in filtered, degassed TNE 100 with 0.05% (v/v) surfactant P20.

### **UV-vis Thermal Melting ( $T_m$ )**

DNA thermal melting experiments were performed on a Cary 300 Bio UV-vis spectrophotometer (Varian). The concentration of each hairpin DNA sequence was 3  $\mu$ M in TNE 100 using 1 cm quartz cuvettes. The solutions of DNA and ligands were tested with the ratio of 2:1 [ligand] / [DNA]. All samples were increased to 95 °C and cooled down to 25 °C slowly before each experiment. The spectrophotometer was set at 260 nm with a 0.5 °C/min increase beginning at 25 °C, which is below the DNA melting temperature and ending above it at 95 °C. The absorbance of the buffer was subtracted, and a graph of normalized absorbance versus temperature was created using KaleidaGraph 4.0 software. The  $\Delta T_m$  values were calculated using a combination of the derivative function and estimation from the normalized graphs.

### **Biosensor-Surface Plasmon Resonance (SPR)**

SPR measurements were performed with a four-channel Biacore T200 optical biosensor system (GE Healthcare, Inc., Piscataway, NJ). A streptavidin-derivatized (SA) CM5 sensor chip was prepared for use by conditioning with a series of 180 s

injections of 1 M NaCl in 50 mM NaOH (activation buffer) followed by extensive washing with HBS buffer (10 mM HEPES, 150 mM NaCl, 3 mM EDTA, and 0.05% P20, pH 7.4). Biotinylated-DNA samples (AAATTT, AAAGTTT and AAAGCTTT hairpins, Figure 1) of 25–30 nM were prepared in HBS buffer and immobilized on the flow cell surface by noncovalent capture. Flow cell 1 was left blank as a reference, while flow cells 2–4 were immobilized separately by manual injection of biotinylated-DNA stock solutions (flow rate of 1  $\mu$ L/min) until the desired amount of DNA response units (RU) was obtained (250–300 RU). Ligand solutions were prepared with degassed and filtered TNE 100 with 0.05% (v/v) surfactant P20 by serial dilutions from a concentrated stock solution. Typically, a series of different ligand concentrations (2 nM to 500 nM) were injected over the DNA sensor chip at a flow rate of 100  $\mu$ L/min for 180 s, followed by buffer flow for ligand dissociation (600–1800 s). After each cycle, the sensor chip surface was regenerated with a 10 mM glycine solution (pH 2.5) for 30 s followed by multiple buffer injections to yield a stable baseline for the following cycles.  $RU_{obs}$  was plotted as a function of free ligand concentration ( $C_{free}$ ), and the equilibrium binding constants ( $K_A$ ) were determined either with a one-site binding model, where  $r = (RU_{obs}/RU_{max})$  represents the moles of bound compound/mol of DNA hairpin duplex and  $K$  is macroscopic binding constant.

$$r = K * C_{free} / (1 + K * C_{free}) \quad (1)$$

$RU_{max}$  can be used as a fitting parameter, and the obtained value compared to the predicted maximal response per bound ligand can also be used to independently evaluate the stoichiometry. Kinetic analyses were performed by globally fitting the binding results for the entire concentration series using a standard 1:1 kinetic model with integrated mass transport-limited binding parameters as described previously.



<sup>18,19</sup> To obtain the optimized kinetic constants ( $k_a$ ,  $k_d$ ), we have immobilized different amount of the target DNAs on CM5 chip surfaces in three independent experiments with different sensor chips.

### **Circular Dichroism (CD)**

Circular dichroism experiments were performed on a Jasco J-810 CD and Jasco J-1500 CD spectrometer in 1 cm quartz cuvette at 25 °C. A buffer scan as a baseline was collected first in the same cuvette and subtracted from the scan of following samples. The hairpin DNA sequence AAAGTTT (5  $\mu$ M), Figure 1, in TNE 100 was added to the cuvette prior to the titration experiments and then the compound was added to the DNA solution and incubated for 10 min to achieve equilibrium binding for the DNA-ligand complex formation. For each titration point, four spectra were averaged from 500 to 230 nm wavelength with scan speed of 50 nm/min, with a response time of 1 s. Baseline-subtracted graphs were created using the KaleidaGraph 4.0 software.

### **Structural Calculations**

Molecular torsional angle map calculations of the compounds were performed in the Spartan'16 software. The “constrain dihedral” command was used with selected compounds to restrain four atoms to define the middle rotation bond and two terminal bonds which formed the dihedral as the calculation targets. The calculation range was set from 0° to 100° or 180° through 11 or 19 steps. Calculations were carried out with the energy profile method at ground state with density functional B3LYP/6-31G\* in vacuum. After the calculations, the relative energy (rel. E) (kJ/mol) was displayed in a spreadsheet. The torsional angle map can be created with

the constraint of the torsional angle as the X-axis and rel. E as the Y-axis by using KaleidaGraph 4.0 software.

### **Ab-Initio Calculations and Molecular Dynamic (MD) Simulation**

Optimization and electrostatic potential calculations were performed for the DB2708 molecule using DFT/B3LYP theory with the 6-31+G\* basis set in Gaussian 09 (Gaussian, Inc., 2009, Wallingford, CT) with Gauss-view 5.09.<sup>20</sup> Partial charges were derived using the RESP fitting method (Restrained Electrostatic potential).<sup>21,22</sup> AMBER 14 (Assisted Model Building with Energy Refinement) software suite was used to perform molecular dynamic (MD) simulations.<sup>23</sup> Canonical *B*-form *ds*[(5'-CCAAAGTTTGG-3')(5'-CCAAACTTTGG-3')] DNA was built in Nucleic Acid Builder (NAB) tool in AMBER. AMBER preparation and force field parameter files required to run molecular dynamic simulations for DB2708 molecule were produced using ANTECHAMBER.<sup>24</sup> Specific atom types assigned for DB2708 molecule were adapted from the ff99 force field. Most of the force field parameters for DB2708 molecule were derived from the existing set of bonds, angles and dihedrals for the similar atom types in parm99 and GAFF force fields.<sup>25</sup> Some dihedral angle parameters were obtained from previously reported parametrized data.<sup>26, 27</sup> Parameters of DB2708 in frcmod file are listed at the Table S1.

AutoDock Vina program was used to dock the DB2528 in the minor groove of DNA to obtain the initial structure for DB2708-DNA complex.<sup>28</sup> MD simulations were performed in explicit solvation conditions where the DNA-DB2708 complex was placed in a truncated octahedron box filled with TIP3P water using xleap program in AMBER. Sodium ions were used to neutralize the system. A 10 Å cutoff was applied on all van der Waals interactions. The MD simulation was

carried out using the Sander module with SHAKE algorithm applied to constrain all bonds. Initially, the system was relaxed with 500 steps of steepest-descent energy minimization. The temperature of the system was then increased from 0 K to 310 K for over 10 ps under constant-volume conditions. In the final step, the production run on the system was subsequently performed for 500 ns under NPT (constant-pressure) conditions. Coordinate file of DB2708-DNA complex along with water molecules in proximity is also attached.

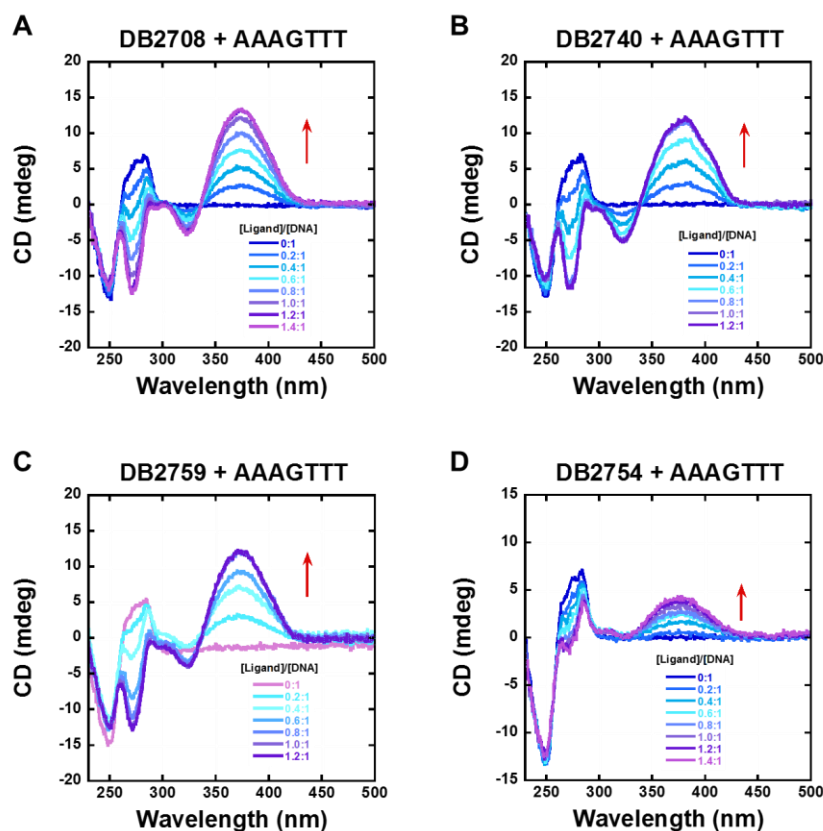

**Figure S1.** Circular dichroism spectra for the titration of representative compounds, A) DB2708, B) DB2740, C) DB2759 and D) 2754 with a 5 μM AAAGTTT sequence in Tris-HCl buffer (50 mM Tris-HCl, 100 mM NaCl, 1 mM EDTA, pH 7.4) at 25°C. Arrows indicate the changes.

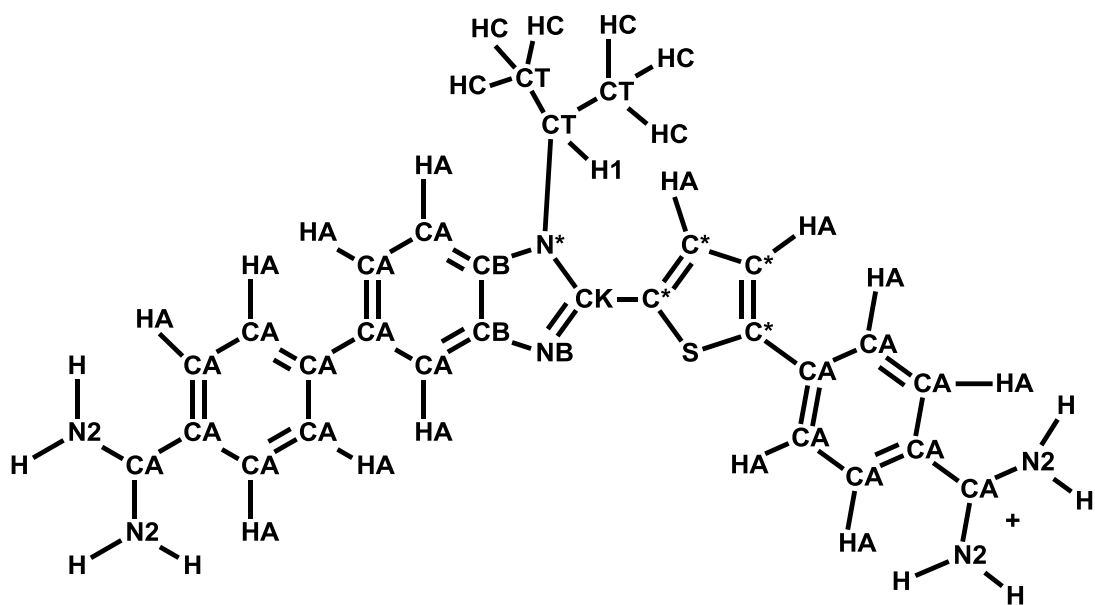

**Figure S2.** Molecular structure with specific atom types used for the DB2708 molecule.

**Table S1.** Thermal melting studies ( $\Delta T_m$ , °C) of DB2457 and analogues with pure AT and mixed DNA sequences. <sup>a</sup>

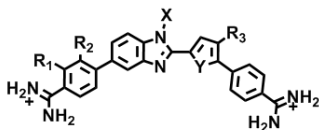

| Compounds   | R <sub>1</sub>  | R <sub>2</sub> | R <sub>3</sub> | X            | Y  | $\Delta T_m$<br>AAATTT<br>(70°C) | $\Delta T_m$<br>AAAGTTT<br>(66°C) | $\Delta T_m$<br>AAAGCTTT<br>(67°C) |
|-------------|-----------------|----------------|----------------|--------------|----|----------------------------------|-----------------------------------|------------------------------------|
| DB2457 (7a) | H               | H              | H              | Me           | S  | 6                                | 14                                | 5                                  |
| DB2737 (7b) | H               | H              | H              | Et           | S  | 7                                | 15                                | 7                                  |
| DB2708 (7c) | H               | H              | H              | <i>i</i> -Pr | S  | 4                                | 14                                | 5                                  |
| DB2711 (7d) | H               | H              | H              |              | S  | 5                                | 13                                | 5                                  |
| DB2718 (7e) | H               | H              | H              |              | S  | 2                                | 11                                | 4                                  |
| DB2715 (7f) | H               | H              | H              |              | S  | 5                                | 13                                | 5                                  |
| DB2728 (7g) | H               | H              | H              |              | S  | 4                                | 13                                | 5                                  |
| DB2764 (7h) | H               | H              | H              |              | S  | 3                                | 13                                | 5                                  |
| DB2726 (7i) | H               | H              | H              |              | S  | 4                                | 14                                | 4                                  |
| DB2714 (7j) | H               | H              | H              |              | S  | 4                                | 13                                | 5                                  |
| DB2727 (7k) | H               | H              | H              |              | S  | 4                                | 13                                | 3                                  |
| DB2738 (7l) | H               | H              | H              |              | S  | 4                                | 13                                | 5                                  |
| DB2740(7m)  | H               | H              | H              |              | S  | 5                                | 17                                | 7                                  |
| DB2747 (7n) | H               | H              | H              |              | S  | 7                                | 16                                | 9                                  |
| DB2759 (7o) | Cl              | H              | H              | <i>i</i> -Pr | S  | 3                                | 12                                | 3                                  |
| DB2762 (7p) | CF <sub>3</sub> | H              | H              | <i>i</i> -Pr | S  | 1                                | 8                                 | 3                                  |
| DB2753 (7q) | H               | Me             | H              | <i>i</i> -Pr | S  | 1                                | 3                                 | 2                                  |
| DB2754 (7r) | H               | H              | Me             | <i>i</i> -Pr | S  | 1                                | 4                                 | 2                                  |
| DB2673 (7s) | H               | H              | H              | Me           | Se | 7                                | 12                                | 5                                  |
| DB2712 (7t) | H               | H              | H              | <i>i</i> -Pr | Se | 5                                | 13                                | 6                                  |

a.  $\Delta T_m = T_m$  (the complex) -  $T_m$  (the free DNA). 3  $\mu$ M DNA sequences were studied in Tris-HCl buffer (50 mM Tris-HCl, 100 mM NaCl, 1 mM EDTA, pH 7.4) with the ratio of 2:1 [ligand]/[DNA]. An average of two independent experiments with a reproducibility of 0.5 °C. Full DNA sequences: AAATTT: 5'-CCAAATTTGCCTCTGCAAATTTGG-3'; AAAGTTT: 5'-CCAAAGTTTGTCTCTCAAAGTTTGG-3'; AAAGCTTT: 5'-CCAAAGCTTTGTCTCTCAAAGCTTTGG-3'.

**Table S2.** Frcmod file of the DB2708 molecule

remark goes here

MASS

|    |       |       |                                             |
|----|-------|-------|---------------------------------------------|
| N2 | 14.01 | 0.530 | parm99                                      |
| CA | 12.01 | 0.360 | parm99                                      |
| CB | 12.01 | 0.360 | parm99                                      |
| C* | 12.01 | 0.360 | gaff SP2 carbon at non-pure aromatic system |
| CK | 12.01 | 0.360 | parm99                                      |
| CT | 12.01 | 0.878 | parm99                                      |
| HA | 1.008 | 0.167 | parm99                                      |
| H  | 1.008 | 0.161 | parm99                                      |
| HC | 1.008 | 0.135 | parm99                                      |
| H1 | 1.008 | 0.135 | parm99                                      |
| N* | 14.01 | 0.530 | parm99                                      |
| NB | 14.01 | 0.530 | parm99                                      |
| S  | 32.06 | 2.900 | gaff                                        |

BOND

|       |       |        |                                                        |
|-------|-------|--------|--------------------------------------------------------|
| CA-CA | 469.0 | 1.400  | parm99                                                 |
| CA-CB | 469.0 | 1.404  | parm99                                                 |
| CB-CB | 520.0 | 1.370  | parm99                                                 |
| CB-N* | 436.0 | 1.374  | parm99                                                 |
| CB-NB | 414.0 | 1.391  | parm99                                                 |
| CT-N* | 337.0 | 1.475  | parm99                                                 |
| CT-CT | 310.0 | 1.526  | parm99                                                 |
| CA-HA | 367.0 | 1.080  | parm99                                                 |
| CT-H1 | 340.0 | 1.090  | parm99                                                 |
| CT-HC | 340.0 | 1.090  | parm99                                                 |
| CK-N* | 440.0 | 1.371  | parm99                                                 |
| CK-NB | 529.0 | 1.304  | parm99                                                 |
| CK-C* | 418.3 | 1.4290 | SOURCE1 740 0.0069 cc-cc gaff similar to gaussian bond |
| C*-C* | 418.3 | 1.4290 | SOURCE1 740 0.0069 gaff                                |
| C*-SS | 279.3 | 1.7370 | SOURCE3 52 0.0194 gaff                                 |
| C*-HA | 347.2 | 1.0850 | SOURCE3 7400.0039 gaff                                 |
| CA-C* | 411.7 | 1.4340 | SOURCE1 80 0.0000 gaff                                 |
| CA-N2 | 481.0 | 1.340  | parm99                                                 |
| S -C* | 279.3 | 1.7370 | SOURCE3 52 0.0194 gaff                                 |

ANGLE

|          |      |        |                        |
|----------|------|--------|------------------------|
| CA-CA-CA | 63.0 | 120.00 | parm99                 |
| CA-CA-CB | 63.0 | 120.00 | parm99                 |
| CA-CA-HA | 50.0 | 120.00 | parm99                 |
| CA-CB-CB | 63.0 | 117.30 | parm99                 |
| CB-CA-HA | 50.0 | 120.00 | parm99                 |
| CA-CB-NB | 70.0 | 132.40 | parm99                 |
| CA-CB-N* | 70.0 | 132.40 | parm99 CA-CB-NB parm99 |
| CB-CB-N* | 70.0 | 106.20 | parm99                 |
| CB-CB-NB | 70.0 | 110.40 | parm99                 |
| CT-CT-CT | 40.0 | 109.50 | parm99                 |
| CT-CT-H1 | 50.0 | 109.50 | parm99                 |

|          |        |         |                   |          |                       |
|----------|--------|---------|-------------------|----------|-----------------------|
| CB-N*-CT | 70.0   | 125.80  | parm99            |          |                       |
| CT-CT-N* | 50.0   | 109.50  | parm99            |          |                       |
| N*-CK-NB | 70.0   | 113.90  | parm99            |          |                       |
| CB-NB-CK | 70.0   | 103.80  | parm99            |          |                       |
| CB-N*-CK | 70.0   | 105.40  | parm99            |          |                       |
| C*-CK-NB | 67.53  | 121.69  | CORR              | 105      | cc-cc-nc GAFF         |
| C*-CK-N* | 67.53  | 121.69  | CORR              | 105      | cc-cc-nc GAFF         |
| C*-C*-CK | 66.24  | 121.77  | CORR              | c2-cc-cc | GAFF                  |
| C*-C*-C* | 67.880 | 110.700 | SOURCE3           | 54       | 3.4091 gaff           |
| CK-N*-CT | 70.0   | 128.80  | parm99            |          |                       |
| CB-N*-CT | 70.0   | 125.80  | parm99            |          |                       |
| H1-CT-N* | 50.0   | 109.50  | parm99            |          |                       |
| HC-CT-HC | 35.0   | 109.50  | parm99            |          |                       |
| HC-CT-CT | 50.0   | 109.50  | parm99            |          |                       |
| C*-C*-HA | 47.14  | 120.86  | CORR              | 1751     | cc-cc-ha GAFF         |
| C*-S -C* | 41.930 | 89.910  | SOURCE3           | 11       | 2.2164 cc-ss-cc gaff  |
| CA-C*-S  | 78.690 | 120.980 | SOURCE4           | 28       | 1.8865 ca-cc-ss gaff  |
| S -C*-C* | 80.780 | 115.020 | SOURCE3           | 2        | 0.0000 cc-cc-ss gaff  |
| CA-C*-C* | 67.660 | 111.040 | SOURCE3           | 9        | 7.9455 ca-cc-cc gaff  |
| CA-CA-N2 | 70.0   | 119.99  | parm99, CM-CA-N2, |          | Gaussian-angle        |
| N2-CA-N2 | 70.0   | 120.00  | parm99            |          |                       |
| H -N2-H  | 35.0   | 120.00  | parm99            |          |                       |
| CA-N2-H  | 50.0   | 120.00  | parm99            |          |                       |
| CA-CA-C* | 5.99   | 120.10  | SOURCE3           | 103      | 0.3451 ca-ca-cc       |
| CK-C*-S  | 78.460 | 120.940 | SOURCE4           | 31       | 1.2422 ce-cc-ss--gaff |

#### DIHE

|             |   |        |        |      |                                  |
|-------------|---|--------|--------|------|----------------------------------|
| N2-CA-N2-H  | 4 | 9.60   | 180.0  | 2.0  | parm 99, X -CA-N2-X              |
| H -N2-CA-CA | 4 | 9.60   | 180.0  | 2.0  | parm 99, X -CA-N2-X              |
| N2-CA-CA-CA | 4 | -3.118 | 0.000  | -2.0 | DB921                            |
| N2-CA-CA-CA | 4 | 0.609  | 90.000 | 1.0  | DB921                            |
| CA-CA-CA-CA | 4 | 14.50  | 180.0  | 2.0  | parm99, X -CA-CA-X               |
| CA-CA-CA-HA | 4 | 14.50  | 180.0  | 2.0  | parm99, X -CA-CA-X               |
| HA-CA-CA-HA | 4 | 14.50  | 180.0  | 2.0  | parm99, X -CA-CA-X               |
| CA-CA-CA-CB | 4 | 14.50  | 180.0  | 2.0  | parm99, X -CA-CA-X               |
| CB-CA-CA-HA | 4 | 14.50  | 180.0  | 2.0  | parm99, X -CA-CA-X               |
| CA-CA-CB-CB | 4 | 14.00  | 180.0  | 2.0  | parm99, X -CA-CB-X               |
| HA-CA-CB-N* | 4 | 14.00  | 180.0  | 2.0  | parm99, X -CA-CB-X               |
| HA-CA-CB-NB | 4 | 14.00  | 180.0  | 2.0  | parm99, X -CA-CB-X               |
| HA-CA-CB-CB | 4 | 14.00  | 180.0  | 2.0  | parm99, X -CA-CB-X               |
| CB-CB-N*-CK | 4 | 6.60   | 180.0  | 2.0  | parm99, X -CB-N*-X               |
| CB-CB-N*-CT | 4 | 6.60   | 180.0  | 2.0  | parm99, X -CB-N*-X               |
| H1-CT-N*-CB | 1 | 0.00   | 000.0  | -2.  | parm98, TC,PC,PAK FOR OS-CT-N*CK |
| H1-CT-N*-CB | 1 | 2.50   | 0.0    | 1.   | parm98, TC,PC,PAK FOR OS-CT-N*CK |
| CA-CB-N*-CT | 4 | 6.60   | 180.0  | 2.0  | parm99, X -CB-N*-X               |
| CA-CB-CB-NB | 4 | 21.80  | 180.0  | 2.0  | parm99, X -CB-CB-X               |
| CA-CB-CB-N* | 4 | 21.80  | 180.0  | 2.0  | parm99, X -CB-CB-X               |
| CB-N*-CT-CT | 1 | 0.00   | 000.0  | -2.  | parm98, TC,PC,PAK FOR OS-CT-N*CK |
| CB-N*-CT-CT | 1 | 2.50   | 0.0    | 1.   | parm98, TC,PC,PAK FOR OS-CT-N*CK |
| N*-CT-CT-HC | 9 | 1.40   | 0.0    | 3.   | JCC,7,(1986),230, X -CT-CT-X     |
| CA-CA-CB-NB | 4 | 14.00  | 180.0  | 2.   | intrpol.bsd.on C6H6, X -CA-CB-X  |

|             |   |        |         |        |                                      |
|-------------|---|--------|---------|--------|--------------------------------------|
| CA-CB-NB-CK | 2 | 5.10   | 180.0   | 2.0    | parm99, X -CB-NB-X                   |
| CA-CB-N*-CK | 4 | 6.60   | 180.0   | 2.     | JCC,7,(1986),230, X -CB-N*-X         |
| NB-CK-N*-CB | 4 | 6.80   | 180.0   | 2.0    | parm99, X -CK-N*-X                   |
| N*-CK-NB-CB | 2 | 20.00  | 180.0   | 2.0    | parm99, X -CK-NB-X                   |
| C*-CK-NB-CB | 2 | 20.00  | 180.0   | 2.0    | parm99, X -CK-NB-X                   |
| C*-CK-NB-CB | 2 | 20.00  | 180.0   | 2.     | JCC,7,(1986),230, X -CK-NB-X         |
| NB-CK-C*-S  | 4 | -0.6   | 180.0   | -4.0   | DB921 for NB-CK-CA-CA                |
| NB-CK-C*-S  | 4 | 3.1    | 180.0   | -2.0   | DB921 for NB-CK-CA-CA                |
| NB-CK-C*-S  | 4 | -0.7   | 360.0   | 1.0    | DB921 for NB-CK-CA-CA                |
| CB-N*-CK-C* | 4 | 6.80   | 180.0   | 2.0    | parm99, X -CK-N*-X                   |
| NB-CK-C*-C* | 4 | 3.1    | 180.0   | -2.0   | DB921 for NB-CK-CA-CA                |
| NB-CK-C*-C* | 4 | -0.6   | 180.0   | -4.0   | DB921 for NB-CK-CA-CA                |
| NB-CK-C*-C* | 4 | -0.7   | 360.0   | 1.0    | DB921 for NB-CK-CA-CA                |
| N*-CK-C*-C* | 4 | 3.42   | 180.0   | 2.0    | New parameter for N*-CK-CA-CA        |
| N*-CK-C*-S  | 4 | -0.6   | 180.0   | -4.0   | DB921 for NB-CK-CA-CA                |
| N*-CK-C*-S  | 4 | 3.1    | 180.0   | -2.0   | DB921 for NB-CK-CA-CA                |
| N*-CK-C*-S  | 4 | -0.7   | 360.0   | 1.0    | DB921 for NB-CK-CA-CA                |
| CT-N*-CK-C* | 4 | 6.80   | 180.0   | 2.0    | parm99, X -CK-N*-X                   |
| CK-C*-C*-C* | 4 | 16.000 | 180.000 | 2.0    | stat value of parm94 X -cc-cc-X      |
| CK-C*-C*-HA | 4 | 16.000 | 180.000 | 2.0    | stat value of parm94 X -cc-cc-X      |
| C*-C*-C*-HA | 4 | 16.000 | 180.000 | 2.0    | stat value of parm94 X -cc-cc-X      |
| C*-S-C*-CA  | 2 | 2.200  | 180.000 | 2.0    | X -c2-ss-X                           |
| S-C*-CA-CA  | 4 | 3.42   | 180.0   | 2.0    | New parameter for N*-CK-CA-CA        |
| HA-CA-CA-C* | 4 | 14.50  | 180.0   | 2.0    | parm99, X -CA-CA-X                   |
| CA-CA-CA-C* | 4 | 14.50  | 180.0   | 2.0    | parm99, X -CA-CA-X                   |
| CA-CA-C*-C* | 4 | 3.1    | 180.0   | -2.0   | DB921 for NB-CK-CA-CA                |
| CA-CA-C*-C* | 4 | -0.6   | 180.0   | -4.0   | DB921 for NB-CK-CA-CA                |
| CA-CA-C*-C* | 4 | -0.7   | 360.0   | 1.0    | DB921 for NB-CK-CA-CA                |
| CA-C*-C*-HA | 4 | 16.000 | 180.000 | 2.0    | stat value of parm94 X cc-cc-        |
| S -C*-C*-HA | 4 | 16.000 | 180.000 | 2.0    | statistic value of parm94 X -cc-cc-X |
| S -C*-C*-C* | 4 | 16.000 | 180.000 | 2.0    | stat value of parm94 X -cc-cc-X      |
| C*-C*-C*-C* | 4 | 16.000 | 180.000 | 2.0    | stat value of parm94 X -cc-cc-X      |
| CA-C*-C*-C* | 4 | 16.000 | 180.000 | 2.0    | stat value of parm94 X -cc-cc-X      |
| HA-C*-C*-HA | 4 | 16.000 | 180.000 | 2.0    | stat value of parm94 X -cc-cc-X      |
| CK-C*-C*-S  | 4 | 16.000 | 180.000 | 2.0    | stat value of parm94 X -cc-cc-X      |
| C*-S -C*-C* | 1 | 1.100  | 180.000 | 2.000  | same as X -c2-ss-X, cc-ss-cc-cd      |
| C*-S -C*-CK | 1 | 1.100  | 180.000 | 2.000  | same as X -c2-ss-X, cc-ss-cc-cc      |
| HC-CT-CT-HC | 1 | 0.15   | 0.0     | 3.000  | Junmei et al, 199                    |
| HC-CT-CT-CT | 1 | 0.16   | 0.0     | 3.     | Junmei et al, 1999                   |
| H1-CT-N*-CK | 1 | 0.00   | 000.0   | -2.000 | parm98,TC,PC,PAK OS-CT-N*-CK         |
| H1-CT-N*-CK | 1 | 2.50   | 0.0     | 1.000  | parm98, TC,PC,PAK FOR OS-CT-N*-CK    |

IMPROPER

|             |     |       |     |                                                         |
|-------------|-----|-------|-----|---------------------------------------------------------|
| CA-CB-CB-NB | 1.1 | 180.0 | 2.0 | Using default value                                     |
| CA-CA-CA-HA | 1.1 | 180.0 | 2.0 | General improper torsional angle (2 general atom types) |
| CA-CA-CA-C* | 1.1 | 180.0 | 2.0 | Using default value                                     |
| CA-CA-CA-C* | 1.1 | 180.0 | 2.0 | Using default value                                     |
| C*-C*-C*-HA | 1.1 | 180.0 | 2.0 | Using default value                                     |
| CA-CA-CA-HA | 1.1 | 180.0 | 2.0 | Using default value                                     |
| CA-CA-CA-CA | 1.1 | 180.0 | 2.0 | Using default value                                     |



|             |     |       |     |                     |
|-------------|-----|-------|-----|---------------------|
| CA-N2-CA-N2 | 1.1 | 180.0 | 2.0 | Using default value |
| CT-CK-N*-CB | 1.1 | 180.0 | 2.0 | Using default value |
| CA-CB-CB-N* | 1.1 | 180.0 | 2.0 | Using default value |
| CK-N*-CK-NB | 1.1 | 180.0 | 2.0 | Using default value |
| C*-C*-C*-S  | 1.1 | 180.0 | 2.0 | Using default value |
| CA-C*-C*-S  | 1.1 | 180.0 | 2.0 | Using default value |
| CA-CA-CA-CA | 1.1 | 180.0 | 2.0 | Using default value |
| CA-CA-CA-CA | 1.1 | 180.0 | 2.0 | Using default value |

#### NONBON

|    |        |        |             |
|----|--------|--------|-------------|
| H1 | 1.3870 | 0.0157 | parm99      |
| H  | 0.6000 | 0.0157 | parm99      |
| HA | 1.4590 | 0.0150 | parm99      |
| CT | 1.9080 | 0.1094 | parm99      |
| CA | 1.9080 | 0.0860 | parm99 (C*) |
| CB | 1.9080 | 0.0860 | parm99 (C*) |
| CK | 1.9080 | 0.0860 | parm99 (C*) |
| N* | 1.8240 | 0.1700 | parm99 (N)  |
| NB | 1.8240 | 0.1700 | parm99 (N)  |
| N2 | 1.8240 | 0.1700 | parm99 (N)  |
| C* | 1.9080 | 0.0860 | parm99      |
| S  | 2.0000 | 0.2500 | parm9       |
| HC | 1.4870 | 0.0157 | OPLS        |

## References

- (1) Farahat, A. A.; Paliakov, E.; Kumar, A.; Barghash, A.-E. M.; Goda, F. E.; Eisa, H. M.; Wenzler, T.; Brun, R.; Liu, Y.; Wilson, W. D.; Boykin, D. W. *Bioorg. Med. Chem.* **2011**, *19* (7), 2156.
- (2) McKenzie, B. M.; Miller, A. K.; Wojtecki, R. J.; Johnson, J. C.; Burke, K. A.; Tzeng, K. A.; Mather, P. T.; Rowan, S. J. *Tetrahedron* **2008**, *64* (36), 8488.
- (3) Schelz, D.; Rotzler, N. *Dyes and Pigments* **1983**, *4* (4), 305.
- (4) Vivian, D. L.; Hartwell, J. L. *J. Org. Chem.* **1953**, *18* (8), 1065.
- (5) Farahat, A. A.; Kumar, A.; Say, M.; Barghash, A. E.-D. M.; Goda, F. E.; Eisa, H. M.; Wenzler, T.; Brun, R.; Liu, Y.; Mickelson, L.; Wilson, W. D.; Boykin, D. W. *Bioorg. Med. Chem.* **2010**, *18* (2), 557.
- (6) Branowska, D.; Farahat, A. A.; Kumar, A.; Wenzler, T.; Brun, R.; Liu, Y.; Wilson, W. D.; Boykin, D. W. *Bioorg. Med. Chem.* **2010**, *18* (10), 3551.
- (7) Reid, C. S.; Farahat, A. A.; Zhu, X.; Pandharkar, T.; Boykin, D. W.; Werbovets, K. A. *Bioorg. Med. Chem. Lett.* **2012**, *22* (22), 6806.
- (8) Farahat, A. A.; Boykin, D. W. *Heterocycles* **2012**, *85* (10), 2437.
- (9) Farahat, A. A.; Boykin, D. W. *J. Heterocyclic Chem.* **2013**, *50* (3), 585.
- (10) Farahat, A. A.; Kumar, A.; Barghash, A. E.-D. M.; Goda, F. E.; Eisa, H. M.; Boykin, D. W. *J. Heterocyclic Chem.* **2010**, *47* (1), 167.
- (11) Laughlin, S.; Wang, S.; Kumar, A.; Farahat, A. A.; Boykin, D. W.; Wilson, W. D. *Chem. Eur. J.* **2015**, *21* (14), 5528.
- (12) Farahat, A. A.; Bennett-Vaughn, C.; Mineva, E. M.; Kumar, A.; Wenzler, T.; Brun, R.; Liu, Y.; Wilson, W. D.; Boykin, D. W. *Bioorg. Med. Chem. Lett.* **2016**, *26* (24), 5907.

- (13) Paul, A.; Kumar, A.; Nanjunda, R.; Farahat, A. A.; Boykin, D. W.; Wilson, W. D. *Org. Biomol. Chem.* **2017**, *15* (4), 827.
- (14) Farahat, A. A.; Ismail, M. A.; Kumar, A.; Wenzler, T.; Brun, R.; Paul, A.; Wilson, W. D.; Boykin, D. W. *Eur. J. Med. Chem.* **2018**, *143*, 1590.
- (15) Guo, P.; Paul, A.; Kumar, A.; Farahat, A. A.; Kumar, D.; Wang, S.; Boykin, D. W.; Wilson, W. D. *Chem. Eur. J.* **2016**, *22* (43), 15404.
- (16) Farahat, A. A.; Kumar, A.; Say, M.; Wenzler, T.; Brun, R.; Paul, A.; Wilson, W. D.; Boykin, D. W. *Eur. J. Med. Chem.* **2017**, *128*, 70.
- (17) Munde, M.; Kumar, A.; Peixoto, P.; Depauw, S.; Ismail, M. A.; Farahat, A. A.; Paul, A.; Say, M. V.; David-Cordonnier, M.-H.; Boykin, D. W.; Wilson, W. D. *Biochemistry* **2014**, *53* (7), 1218.
- (18) Liu, Y.; Kumar, A.; Depauw, S.; Nhili, R.; David-Cordonnier, M.-H.; Lee, M. P.; Ismail, M. A.; Farahat, A. A.; Say, M.; Chackal-Catoen, S.; Batista-Parra, A.; Neidle, S.; Boykin, D. W.; Wilson, W. D. *J. Am. Chem. Soc.* **2011**, *133* (26), 10171.
- (19) Munde, M.; Kumar, A.; Nhili, R.; Depauw, S.; David-Cordonnier, M.-H.; Ismail, M. A.; Stephens, C. E.; Farahat, A. A.; Batista-Parra, A.; Boykin, D. W.; Wilson, W. D. *J. Mol. Biol.* **2010**, *402* (5), 847.
- (20) Frisch, M. J.; Trucks, G. W.; Schlegel, H. B.; GE Scuseria... - Inc.; Wallingford; CT; 2010. *Gaussian 09, revision b. 01, Gaussian.*
- (21) Bayly, C. I.; Cieplak, P.; Cornell, W.; Kollman, P. A. *J. Phys. Chem.* **1993**, *97* (40), 10269.
- (22) Singh, U. C.; Kollman, P. A. *J. Comput. Chem.* **1984**, *5* (2), 129.
- (23) Case, D. A.; Babin, V.; Berryman, J.; Betz, R. M.; Cai, Q.; Cerutti, D. S.; Cheatham, T. E., III; Darden, T. A.; Duke, R. E.; Gohlke, H.; Goetz, A. W.; Gusarov, S.; Homeyer, N.; Janowski, P.; Kaus, J.; Kolossváry, I.; Kovalenko, A.; Lee, T. S.; LeGrand, S.; Luchko, T.; Luo, R.; Madej, B.; Merz, K. M.; Paesani, F.; Roe, D. R.; Roitberg, A.; Sagui, C.; Salomon-Ferrer, R.; Seabra, G.; Simmerling, C. L.; Smith, W.; Swails, J.; Walker, R. C.; Wang, J.; Wolf, R. M.; Wu, X.; Kollman, P. A. *AMBER 14*, **2014**.
- (24) Wang, J.; Wang, W.; Kollman, P. A.; Case, D. A. *J. Mol. Graph. Model.* **2006**, *25* (2), 247.
- (25) Harika, N. K.; Germann, M. W.; Wilson, W. D. *Chem. Eur. J.* **2017**, *23* (69), 17612.
- (26) Athri, P.; Wilson, W. D. *J. Am. Chem. Soc.* **2009**, *131* (22), 7618.
- (27) Špačková, N.; Cheatham, T. E.; Ryjáček, F.; Lankaš, F.; van Meervelt, L.; Hobza, P.; Šponer, J. *J. Am. Chem. Soc.* **2003**, *125* (7), 1759.
- (28) Trott, O.; Olson, A. J. *J. Comput. Chem.* **2009**, *65*, 455.

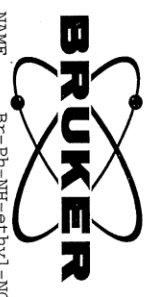

Br-Ph-NH-ethyl-NO2

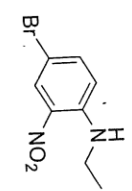

- 8.1567
- 8.1510
- 7.6595
- 7.6552
- 7.6364
- 7.6320
- 7.0510
- 7.0278

- 3.4152
- 3.3976
- 3.3802
- 3.3656
- 3.3483
- 2.5119
- 2.5075
- 2.5032

- 1.2297
- 1.2119
- 1.1941

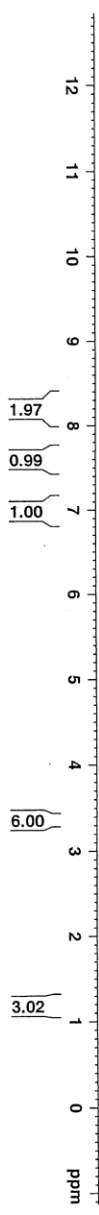

```

NAME Br-Ph-NH-ethyl-NO2
EXPNO 1
PROCNO 1
Date_ 20170927
Time 14.29
INSTRUM spect
PROBHD 5 mm PABBO BB-
PULPROG zg30
TD 65536
SOLVENT DMSO
NS 4
DS 2
SMH 5592.841 Hz
FIDRES 0.085340 Hz
AQ 5.8589683 sec
RG 228.1
DW 89.400 usec
DE 6.00 usec
TE 295.0 K
D1 1.00000000 sec
TD0 1

===== CHANNEL f1 =====
NUC1 1H
P1 6.40 usec
PL1 0.00 dB
SFO1 400.1324008 MHz
SI 32768
SF 400.1300000 MHz
WDW EM
SSB 0
LB 0.30 Hz
GB 0
PC 1.00
  
```

8.1580  
7.8938  
7.8754  
7.6614  
7.6386  
7.0977  
7.0745

3.9524  
3.9362  
3.9197  
3.9037

2.5080

1.2637  
1.2480

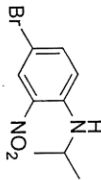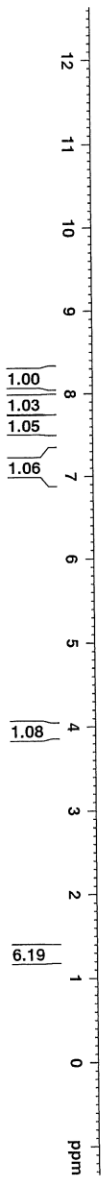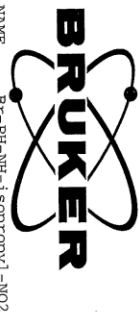

```

NAME Br-PH-NH-isopropyl-1-NO2
EXPNO 1
PROCNO 1
Date_ 20110726
Time 12.21
INSTRUM spect
PROBHD 5 mm PABBO BB-
PULPROG zg30
TD 65536
SOLVENT DMSO
NS 4
DS 2
SWH 5592.841 Hz
FIDRES 0.085340 Hz
AQ 5.8589683 sec
RG 181
RW 89.400 usec
DE 6.00 usec
TE 296.1 K
D1 1.0000000 sec
TD0 1

===== CHANNEL f1 =====
NUC1 1H
P1 6.40 usec
PL1 0.00 dB
SFO1 400.1324008 MHz
SI 32768
SF 400.1300000 MHz
WDW EM
SSB 0
LB 0.30 Hz
GB 0
PC 1.00
  
```

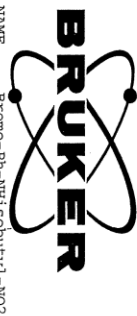

Bromo-Ph-NHIsobutyl-NO2

```

NAME          1
EXPNO         1
PROCNO        1
Date_         20170809
Time_         13.19
INSTRUM       spect
PROBHD        5 mm PABBO BB-
PULPROG       zg30
TD            65536
SOLVENT       DMSO
NS            4
DS            2
SMH           5592.841 Hz
FIDRES        0.085340 Hz
AQ            5.8589683 sec
RG            71.8
DW            89.400 usec
DE            6.00 usec
TE            295.2 K
D1            1.00000000 sec
TD0           1
  
```

```

===== CHANNEL f1 =====
NUC1          1H
p1            6.40 usec
pfl1          0.00 dB
SFO1          400.1324008 MHz
SI            32768
SF            400.1300000 MHz
WDW           EM
SSB           0
LB            0.30 Hz
GB            0
PC            1.00
  
```

- 8.2090
- 8.1011
- 7.5886
- 7.5657
- 7.0211
- 6.9981

- 3.3685
- 3.1686
- 3.1537
- 3.1382
- 2.5075
- 1.9432
- 1.9268
- 1.9103
- 1.8939
- 1.8776
- 0.9385
- 0.9222

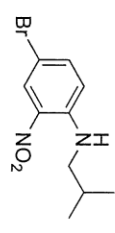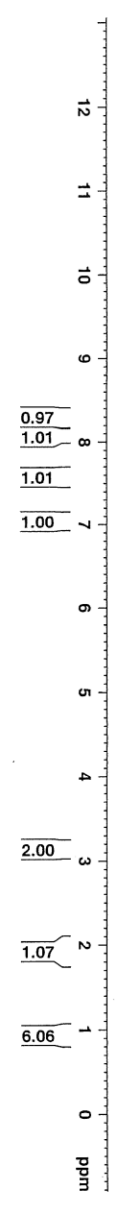

8.1745  
8.1464  
7.6466  
7.6235  
7.0556  
7.0326

3.3698  
3.3508  
3.3334  
3.3181  
2.5079  
1.6066  
1.5882  
1.5706  
1.3967  
1.3785  
1.3602  
1.3419  
0.9355  
0.9174  
0.8997

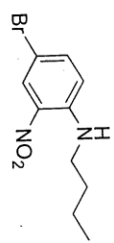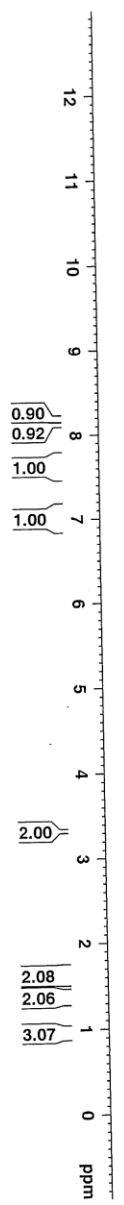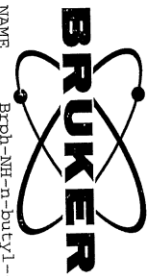

NAME BrpH-nH-n-butyl1--NO2

EXPNO 1  
PROCNO 1  
Date\_ 20170828  
Time 11.45  
INSTRUM spect  
PROBHD 5 mm PABBO BB-  
PULPROG zg30  
TD 65536  
SOLVENT DMSO  
NS 4  
DS 2  
SWH 5592.841 Hz  
FIDRES 0.085340 Hz  
AQ 5.8589683 sec  
RG 161.3  
RG 89.400 usec  
DE 6.00 usec  
TE 296.0 K  
TD0 1.00000000 sec  
D1 1

==== CHANNEL f1 =====  
NUC1 1H  
P1 6.40 usec  
PL 0.00 dB  
SFO1 400.1324008 MHz  
SI 32768  
SF 400.1300000 MHz  
WDW EM  
SSB 0  
LB 0.30 Hz  
GB 0  
PC 1.00

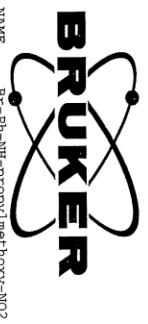

NAME Br-Ph-NH-propylmethoxy-NO2  
 EXNO 1  
 PROCNO 1  
 Date\_ 20170926  
 Time\_ 10.13  
 INSTRUM spect  
 PROBHD 5 mm PABBO BB-  
 PULPROG zg30  
 TD 65536  
 SOLVENT DMSO  
 NS 4  
 DS 2  
 SWH 5592.844 Hz  
 FIDRES 0.066544 Hz  
 AQ 5.8589483 sec  
 RG 181  
 DW 89.400 usec  
 DE 6.00 usec  
 TE 300.0 K  
 D1 1.00000000 sec  
 TD0 1

==== CHANNEL F1 =====  
 NUCL 1H  
 P1 6.40 usec  
 PL1 0.00 GB  
 SFO1 400.1324008 MHz  
 SI 32008  
 SF 400.130000 MHz  
 EQ EM  
 KWB 0  
 SSB 0  
 LB 0.30 Hz  
 GB 0  
 PC 1.00

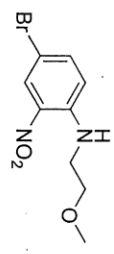

- 8.3756
- 8.3626
- 8.3497
- 8.1520
- 8.1459
- 7.6579
- 7.6520
- 7.6349
- 7.6290
- 7.0370
- 7.0138

- 3.4581
- 3.4436
- 3.4289
- 3.4238
- 3.4067
- 3.3922
- 3.3758
- 3.3528
- 3.2615
- 2.5121
- 2.5078
- 2.5034
- 1.8839
- 1.8679
- 1.8525
- 1.8373
- 1.8212

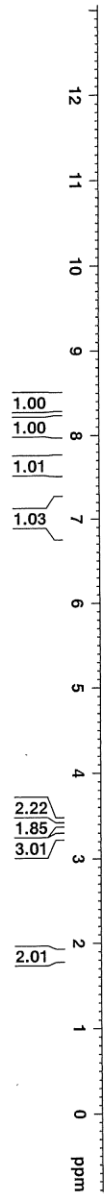

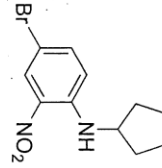

8.1383  
7.9740  
7.9596  
7.6559  
7.6331  
7.0847  
7.0619

4.0480  
4.0334  
4.0184  
3.3415  
2.5073  
2.0699  
2.0553  
2.0401  
1.7062  
1.6901  
1.6573  
1.6306  
1.6134  
1.5673  
1.5533  
1.5376  
1.5228

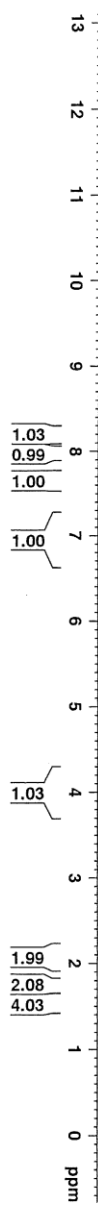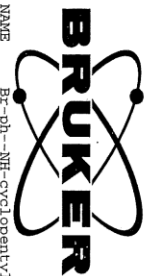

NAME Br-ph-NH-cyclopentyl-NO2

EXPNO 1  
PROCNO 1  
Date\_ 20170823  
Time 14.22  
INSTRUM spect  
PROBHD 5 mm PABBO 430  
PULPROG zgpg30  
TD 65536  
SOLVENT DMSO  
NS 4  
DS 2  
SWH 5592.841 Hz  
FIDRES 0.085340 Hz  
AQ 5.8589683 sec  
RG 128  
DM 89.400 usec  
DE 6.00 usec  
TE 295.2 K  
D1 1.00000000 sec  
TD0 1

===== CHANNEL f1 =====  
NUC1 1H  
P1 6.40 usec  
PL1 0.00 dB  
SFO1 400.1324008 MHz  
SI 32768  
SF 400.1300000 MHz  
WDW EM  
SSB 0  
LB 0.30 Hz  
GB 0  
PC 1.00



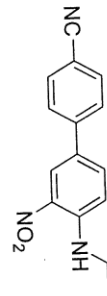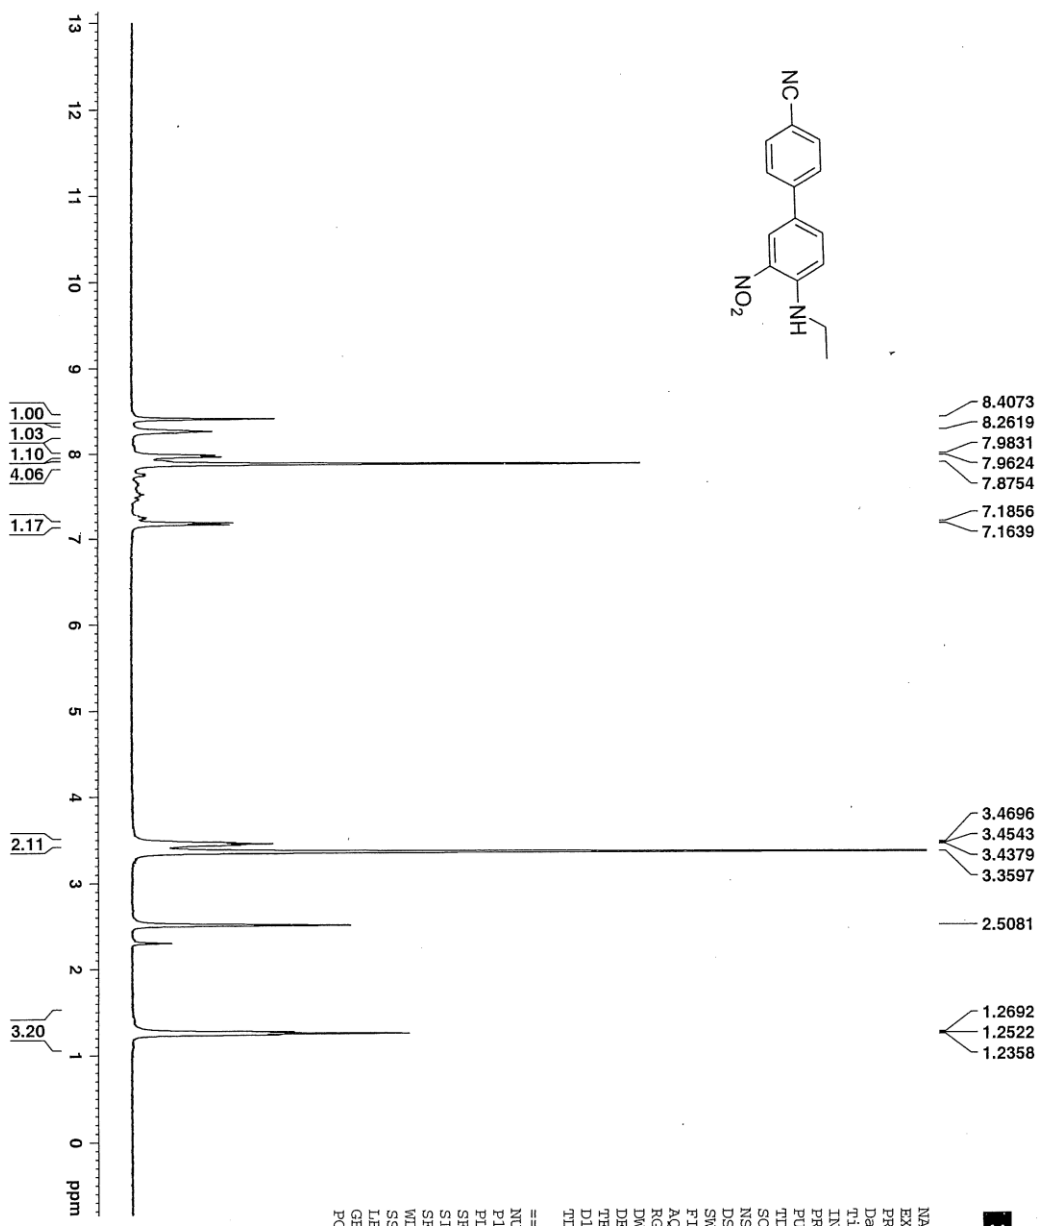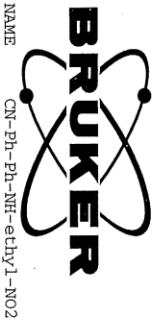

NAME CN-Ph-Ph-NH-ethyl-NO2  
 EXPNO 1  
 PROCNO 1  
 Date\_ 20170928  
 Time 13.36  
 INSTRUM spect  
 PROBHD 5 mm PABBO BB-  
 PULPROG zg30  
 TD 65536  
 SOLVENT DMSO  
 NS 4  
 DS 2  
 SWH 5592.841 Hz  
 FIDRES 0.085340 Hz  
 AQ 5.8589683 sec  
 RG 228.1  
 DW 89.400 usec  
 DE 6.00 usec  
 TE 296.2 K  
 D1 1.0000000 sec  
 TD0 1

===== CHANNEL f1 =====  
 NUC1 1H  
 P1 6.40 usec  
 PL1 0.00 dB  
 SFO1 400.1324008 MHz  
 SI 32768  
 SF 400.1300000 MHz  
 WDW EM  
 SSB 0  
 LB 0.30 Hz  
 GB 0  
 PC 1.00

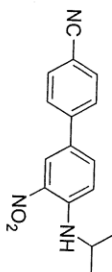

8.4982  
8.4927  
7.7443  
7.7242  
7.6898  
7.6688  
7.2843  
7.0276  
7.0049

3.9380  
3.9219

1.4053  
1.3894

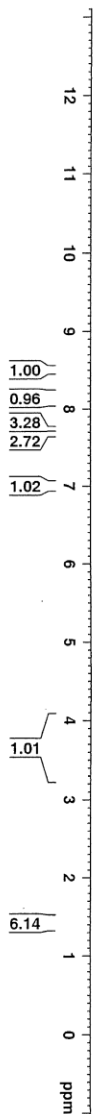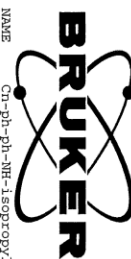

```

NAME      Cn-p1-ph-NH-Isopropyl-NO2
EXPNO     1
PROCNO    1
Date_     20180307
Time      10:40
INSTRUM   spect
PROBHD    5 mm PABBO BB-
PULPROG   zgpg30
TD         65536
SOLVENT   CDCl3
NS         4
DS         2
SWH        5592.941 Hz
FIDRES     0.859283 Hz
AQ         3.62
RG         382
DM         89.400 usac
DE         6.00 usac
TE         296.5 K
D1         1.00000000 sec
TD0        1

===== CHANNEL f1 =====
NUC1       1H
P1         6.40 usac
PL1        0.00 dB
SFO1       400.1324008 MHz
SI         32768
SF         400.1300000 MHz
WDW        EM
SSB        0
GB         0.30 Hz
PC         1.00
  
```

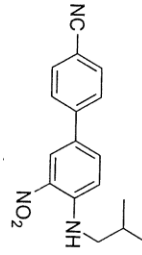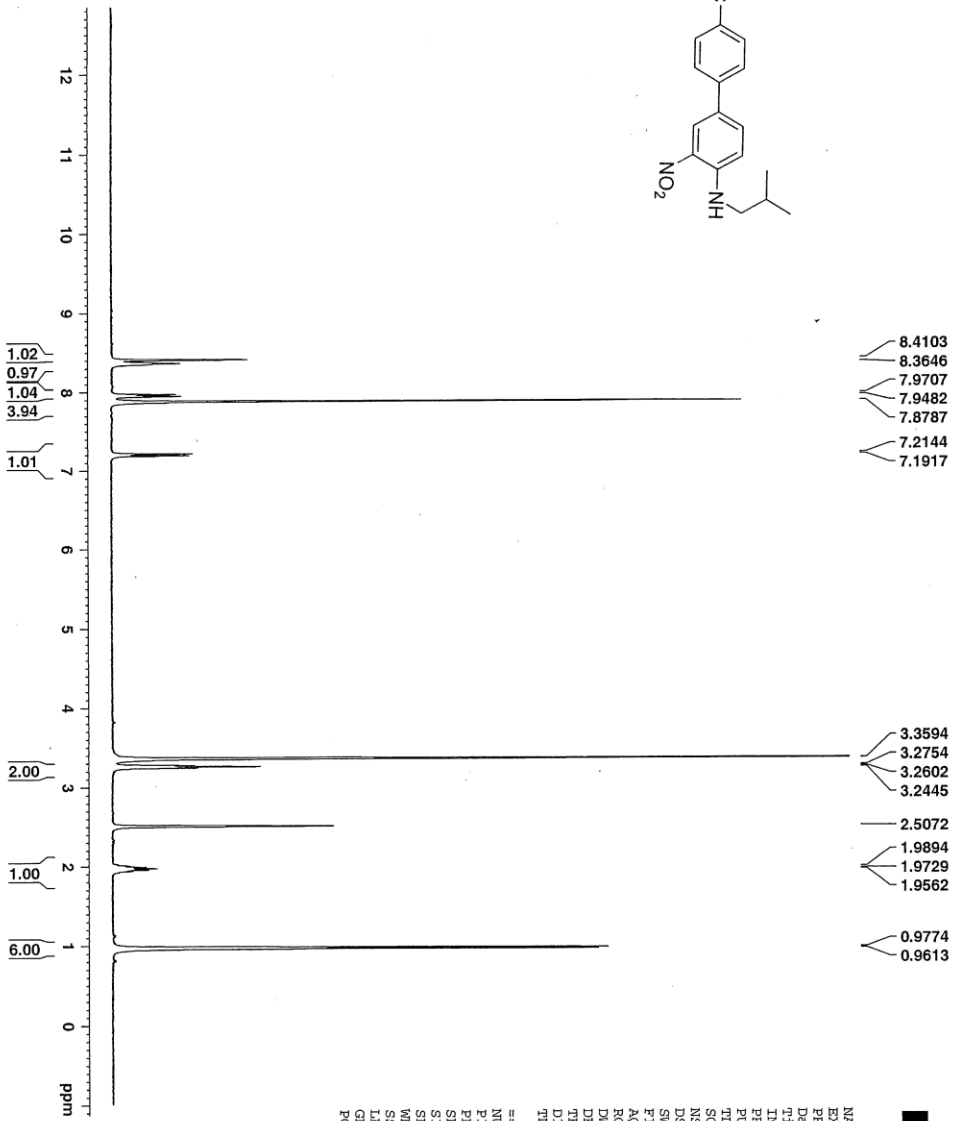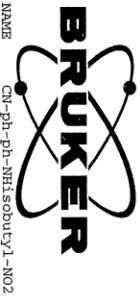

```

NAME          CN-ph-ph-NHIsoputyl-NO2
EXPNO         1
PROCNO        1
Date_         20170811
Time          11:30
INSTRUM       spect
PROBHD        5 mm PABBO
PULPROG       zg30
TD            65536
SOLVENT       DMSO
NS            4
DS            2
SMH           5592.841 Hz
FIDRES        0.085340 Hz
AQ            5.8589683 sec
RG            362
DE            89.400 usec
TE            295.4 K
D1            1.00000000 sec
TD0           1

===== CHANNEL f1 =====
NUC1          1H
P1            6.40 usec
PL1           0.00 dB
SFO1         400.1324008 MHz
SF           400.1324008 MHz
WDW          EM
SSB           0
LB            0.30 Hz
GB            0
PC            1.00
  
```

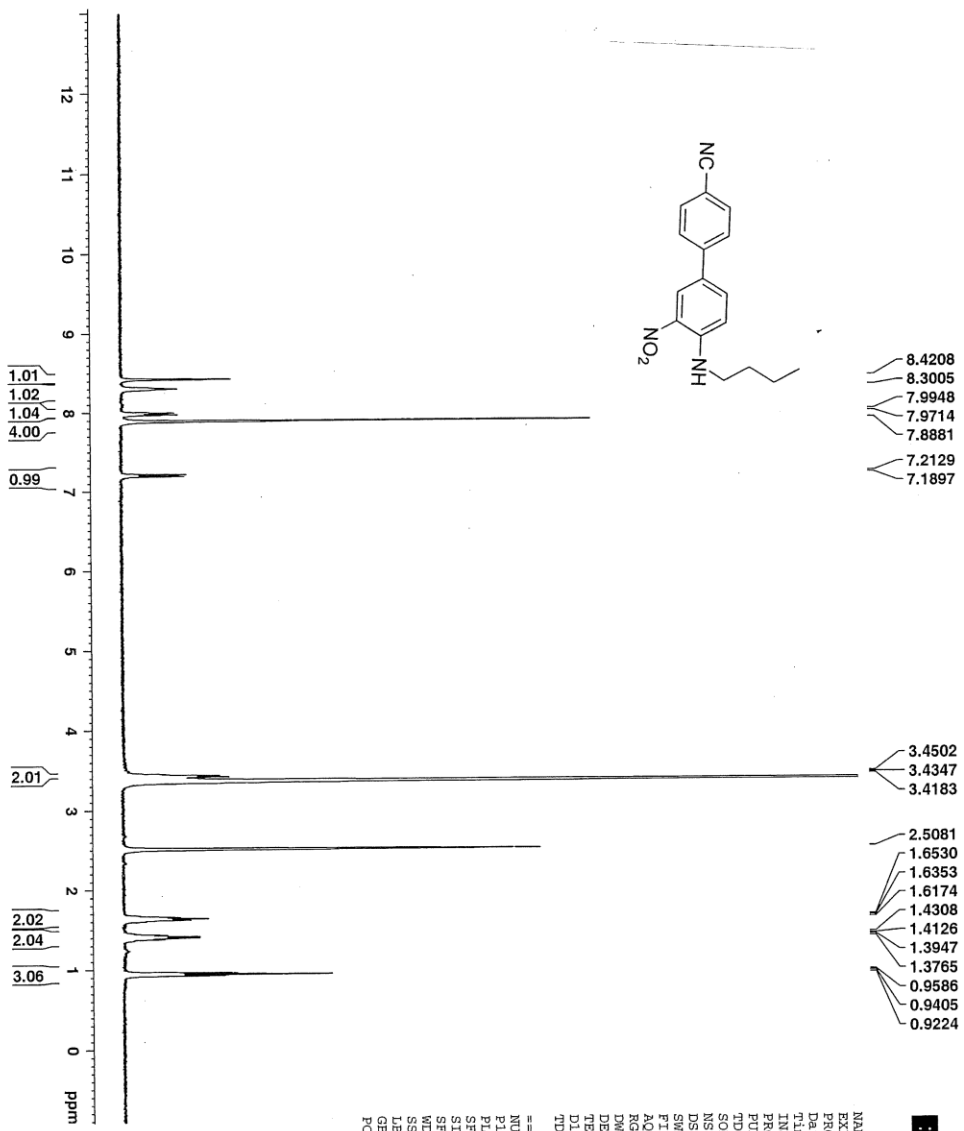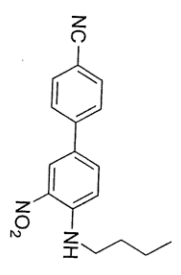

8.4208  
8.3005  
7.9948  
7.9714  
7.8881  
7.2129  
7.1897

3.4502  
3.4347  
3.4183  
2.5081  
1.6530  
1.6353  
1.6174  
1.4308  
1.4126  
1.3947  
1.3765  
0.9586  
0.9405  
0.9224

1.01  
1.02  
1.04  
4.00  
0.99  
2.01  
2.02  
2.04  
3.06

NAME CN-Ph- Ph-NH-n-butyl-NO2  
EXPNO 1  
PROCNO 1  
Date\_ 20170829  
Time\_ 14.24  
INSTRUM spect  
PROBHD 5 mm PABBO 250  
PULPROG zgpg30  
TD 65536  
SOLVENT DMSO  
NS 4  
DS 2  
SWH 5592.841 Hz  
FIDRES 0.085340 Hz  
AQ 5.8589683 sec  
RG 362  
DW 89.400 usec  
DE 6.00 usec  
TE 286.9 K  
DI 1.00000000 sec  
TD0 1

===== CHANNEL f1 =====  
NUC1 1H  
PI 6.40 usec  
PL 0.00 dB  
SFO1 400.1324008 MHz  
SI 32768  
SF 400.1300000 MHz  
WDW EM  
SSB 0  
LB 0.30 Hz  
GB 0  
PC 1.00

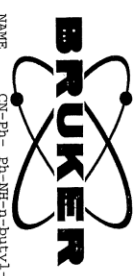

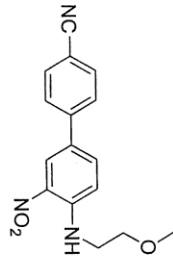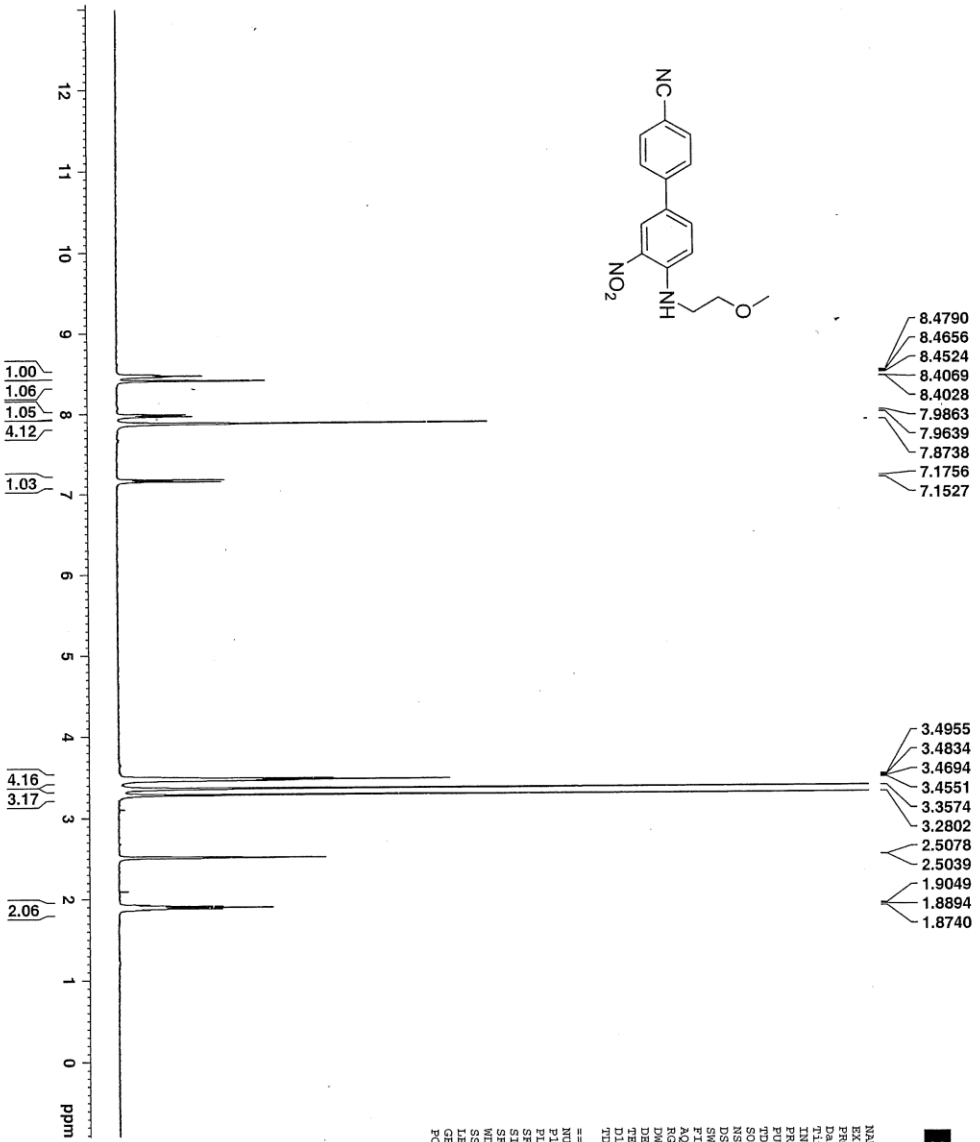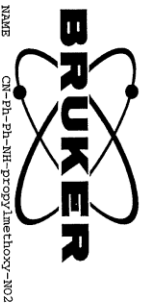

NAME CN-Ph-NH-PrOxylmethoxy-NO2  
 EXPNO 1  
 PROCNO 1  
 Date\_ 20170928  
 TIME 17:11:00  
 TMRUM aspect  
 PROBD 5 mm PABBO BB-  
 PULPROG zg30  
 TD 65536  
 SOLVENT DMSO  
 DS 2  
 SWH 5592.841 Hz  
 FIDRES 0.085340 Hz  
 AQ 5.8589683 sec  
 RG 89.401  
 DE 6.00 usec  
 TE 296.2 K  
 D1 1.00000000 sec  
 TDO 1

===== CHANNEL f1 =====  
 NUC1 1H  
 P1 6.40 usec  
 PL1 0.00 dB  
 SFO1 400.132498 MHz  
 SF 400.132498 MHz  
 SR 400.130000 MHz  
 WDW EM  
 SSB 0  
 LB 0.30 Hz  
 GB 0  
 PC 1.00

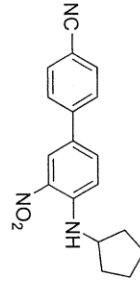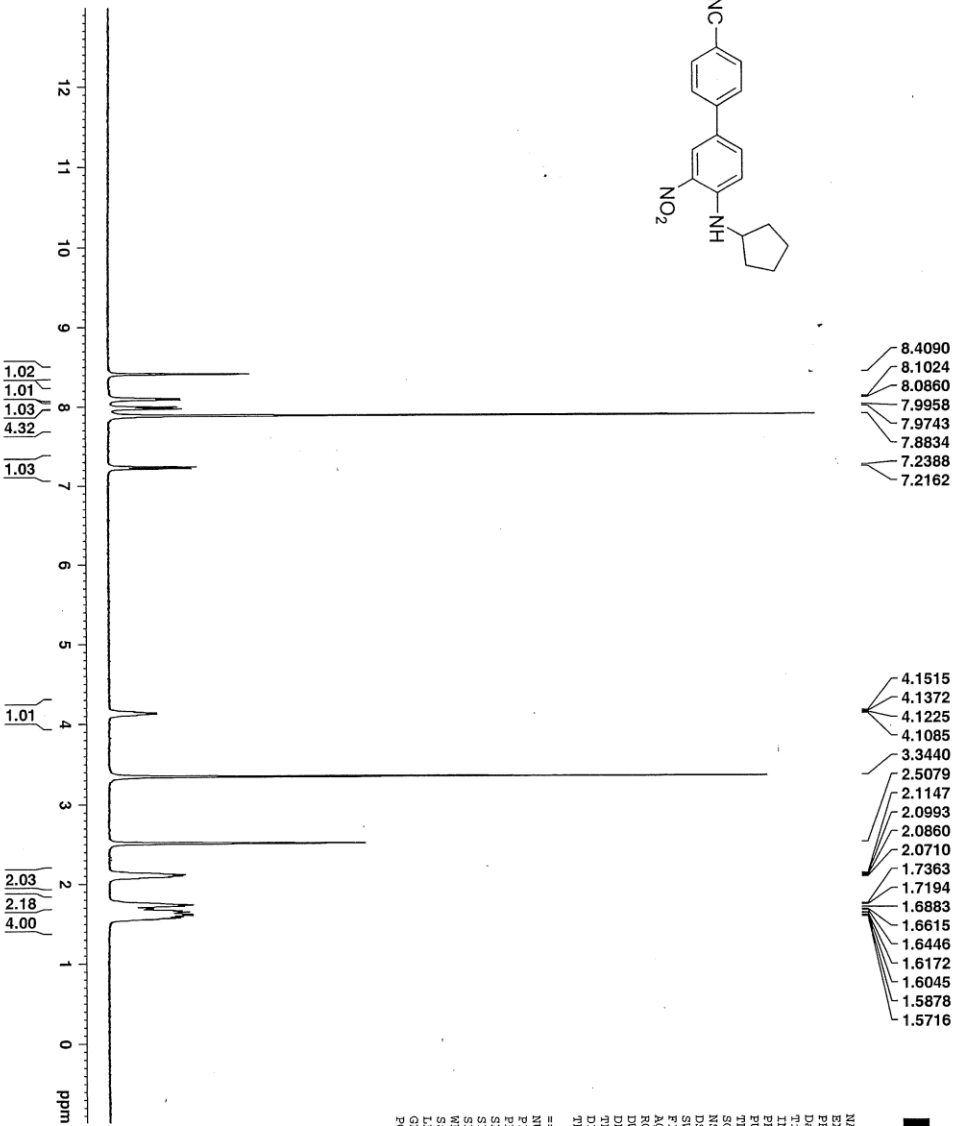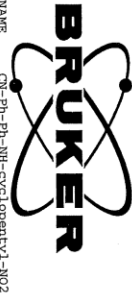

NAME GN-Ph-NH-cyclopentyl-1-NO2  
 EXPNO 1  
 PROCNO 1  
 Date\_ 20170824  
 Time 15.02  
 INSTRUM spect  
 PROBRD 5 mm PABBO BBO  
 PULPROG zgpg30  
 TD 65536  
 SOLVENT DMSO  
 NS 4  
 DS 2  
 SWH 5592.941 Hz  
 FIDRES 0.32141 Hz  
 AQ 5.6899693 sec  
 RG 352  
 DW 89.400 usec  
 DE 6.00 usec  
 TE 286.8 K  
 D1 1.00000000 sec  
 D11 1  
 D10 1

===== CHANNEL f1 =====  
 NUC1 1H  
 P1 6.40 usec  
 PL1 0.00 dB  
 SFO1 400.132408 MHz  
 SF 400.132408 MHz  
 WDM 400.130000 MHz  
 EN EM  
 SSB 0  
 LB 0.30 Hz  
 GB 0  
 PC 1.00

- 8.4582
- 8.4534
- 8.0736
- 8.0398
- 8.0205
- 7.9973
- 7.9768
- 7.8611
- 7.8406
- 7.2251
- 7.2022

- 4.0578
- 4.0421
- 4.0252
- 4.0094
- 3.3420

- 2.5077
- 1.3047
- 1.2890

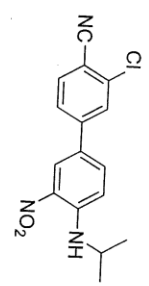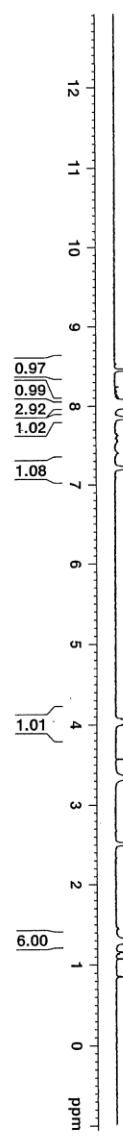

**BRUKER**  
 NAME: Ch-0-Cl-pH-pH-NH-Isopropyl-NO2  
 EXPNO: 1  
 PROCNO: 20180312  
 F2 - Acq: 12.17  
 INSTRUM: spect  
 PROBMG: 5 mm PABBO BB-  
 PULPROG: zgpg30  
 TD: 6536  
 SOLVENT: DMSO  
 NS: 4  
 DS: 4  
 SS: 1  
 SFO: 500.13641 Hz  
 FIDRES: 0.065340 Hz  
 AQ: 5.859683 sec  
 RG: 256  
 RW: 89.400 usec  
 DM: 4.00 usec  
 DE: 256.7 K  
 ME: 1.00000000 sec  
 DI: 1  
 TDO: 1

===== CHANNEL f1 =====  
 NUC1: 1H  
 P1: 6.40 usec  
 PL1: 0.00 dB  
 SFO1: 400.136408 MHz  
 SF: 400.136408 MHz  
 WFW: 400.1300000 MHz  
 SSB: EX  
 GB: 0 Hz  
 CB: 0 Hz  
 PC: 1.00

8.5387  
8.5337  
8.2347  
8.2012  
8.0975  
8.0932  
8.0749  
8.0703  
8.0570  
8.0383  
7.2605  
7.2374

4.0770  
4.0608  
4.0439  
4.0276  
3.3342  
2.5078  
1.3127  
1.2971

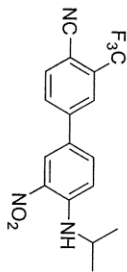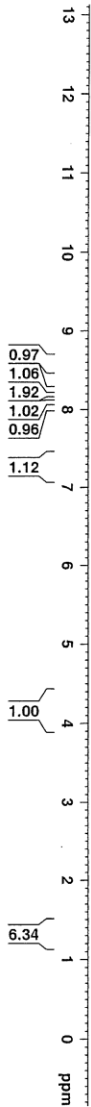

NAME CNF-CF3-BH-BH-4stepcopy1-Nitro  
EXPNO 1  
PROCNO 1  
F2 20180329  
Date\_ 14 13  
Time 14 13  
INSTRUM spect  
PROBHD 5 mm PABBO BH-  
PULPROG zgpg30  
TD 65536  
SOLVENT DMSO  
NS 4  
DS 2  
SWH 5592.841 Hz  
FIDRES 0.0853140 Hz  
AQ 0.0400000 sec  
RG 318.898512 sec  
DW 99.400 usec  
DE 2.700 usec  
TE 300.2 K  
D1 1.00000000 sec  
TDO 1

===== CHANNEL f1 =====  
NUC1 1H  
P1 6.40 usec  
PL 0.00 dB  
SFO1 400.1324008 MHz  
SI 32768  
SF 400.1300000 MHz  
SFR 0  
SSB 0  
LB 0.30 Hz  
GB 0  
PC 1.00

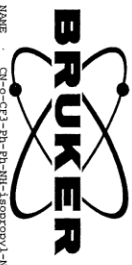



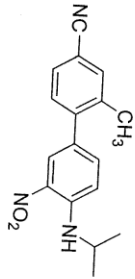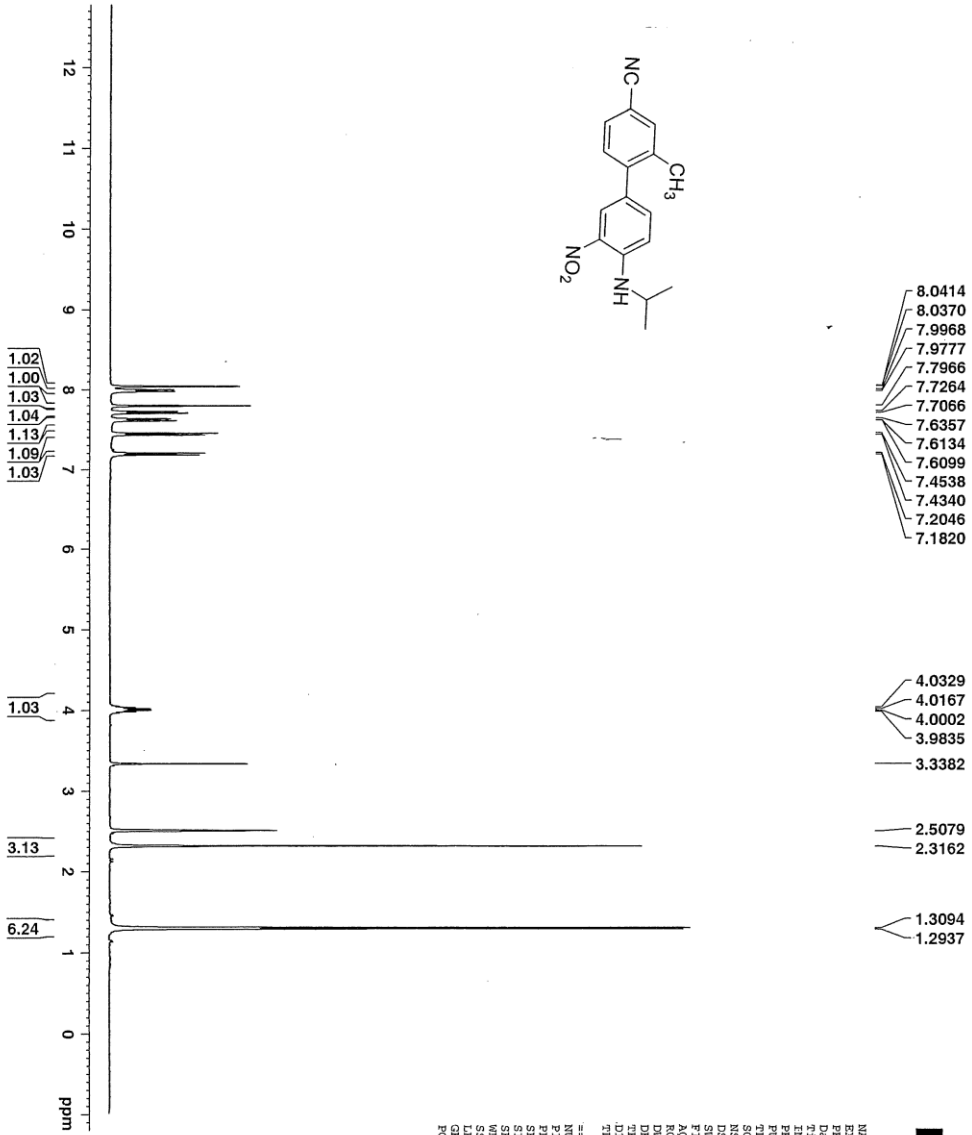

NAME Ch-Ph-m-Me-pH-N-Isopropyl-NO2  
 PROCD 1  
 Date- 20180126  
 Time 12:47  
 INSTRUM spect  
 PULPROG zgpg30  
 TD 65536  
 SOLVENT DMSO  
 NS 4  
 DS 1  
 SMH 5592.841 Hz  
 FIDRES 0.085340 Hz  
 AQ 5.8589683 sec  
 RG 2287.1 usec  
 DE 6.400 usec  
 TE 296.5 K  
 .D1 1.00000000 sec  
 TD0 1

===== CHANNEL f1 =====  
 NUCL 1H  
 P1 6.40 usec  
 PL 0.00 dB  
 SFO1 400.132408 MHz  
 SI 32768  
 SF 400.1300000 MHz  
 WDM EX  
 SSB 0.30 Hz  
 GB 0  
 PC 1.00

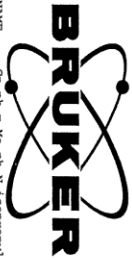

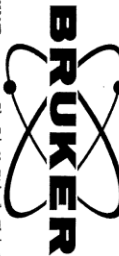

CH-PH-BI-N-Ethyl-THI-PH-CN

```

NAME      CH-PH-BI-N-Ethyl-THI-PH-CN
EXNO      1
PROCNO    1
Date_     20171004
Time      13.21
INSTRUM   spect
PROBHD    5 mm PABBO BB-
PULPROG   zgpg30
TD        65532
SOLVENT    DMSO
NS        4
DS        2
SWH        5592.841 Hz
FIDRFS     0.085340 Hz
AQ         5.8589683 sec
RG         82281.1
DE         6.00 usec
TE         297.0 K
D1         1.00000000 sec
TD0        1
===== CHANNEL f1 =====
NUC1       1H
P1         6.41 usec
PL1        0.00 dB
SFO1       400.1324008 MHz
SI         32768
SF         400.1300000 MHz
WDW        EM
SSB        0
GB         0.30 Hz
LB         1.00
PC
  
```

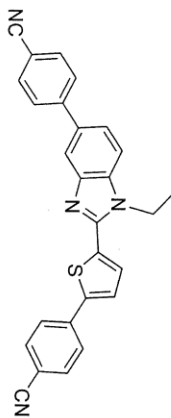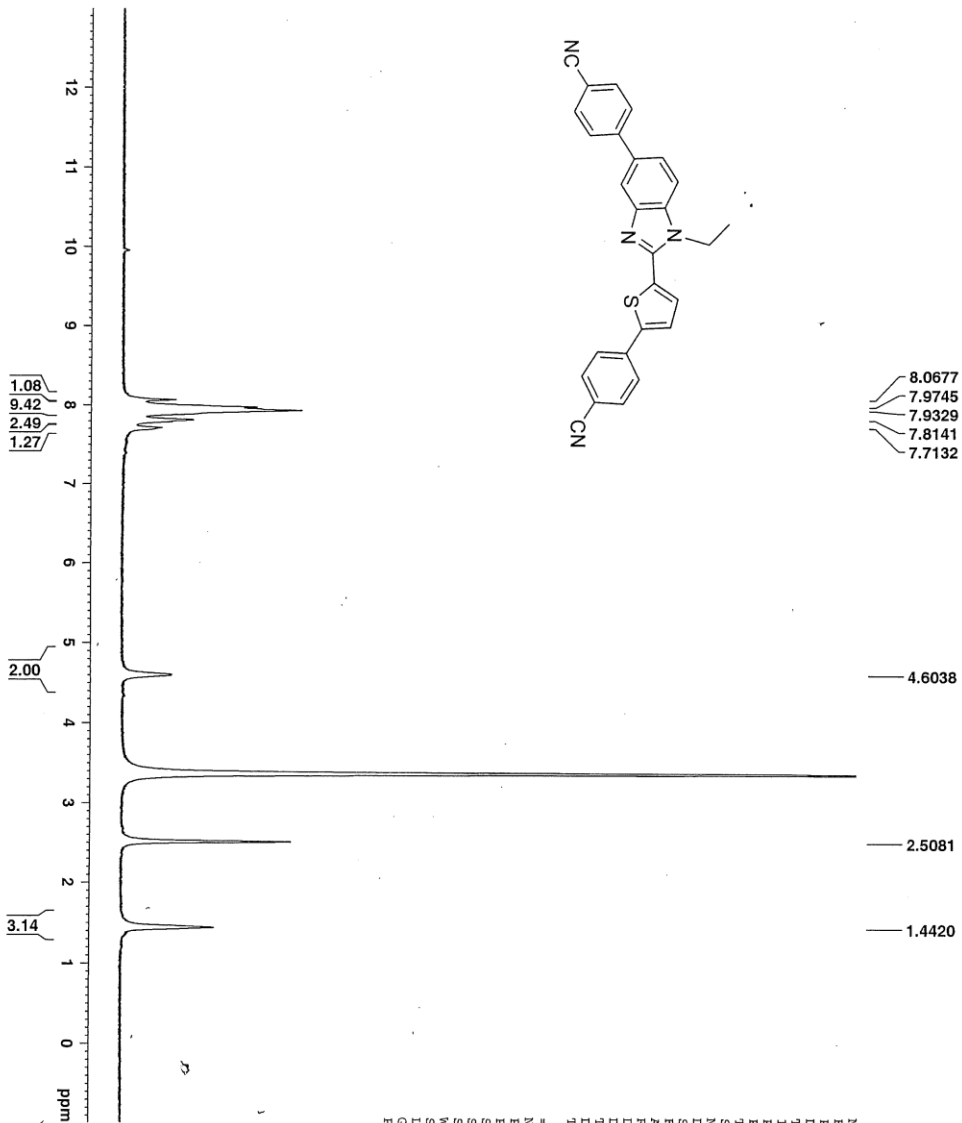

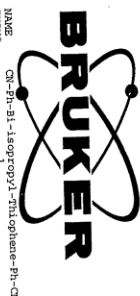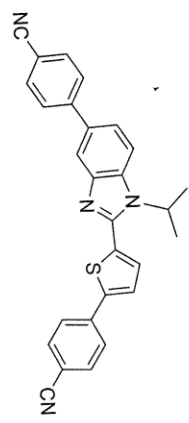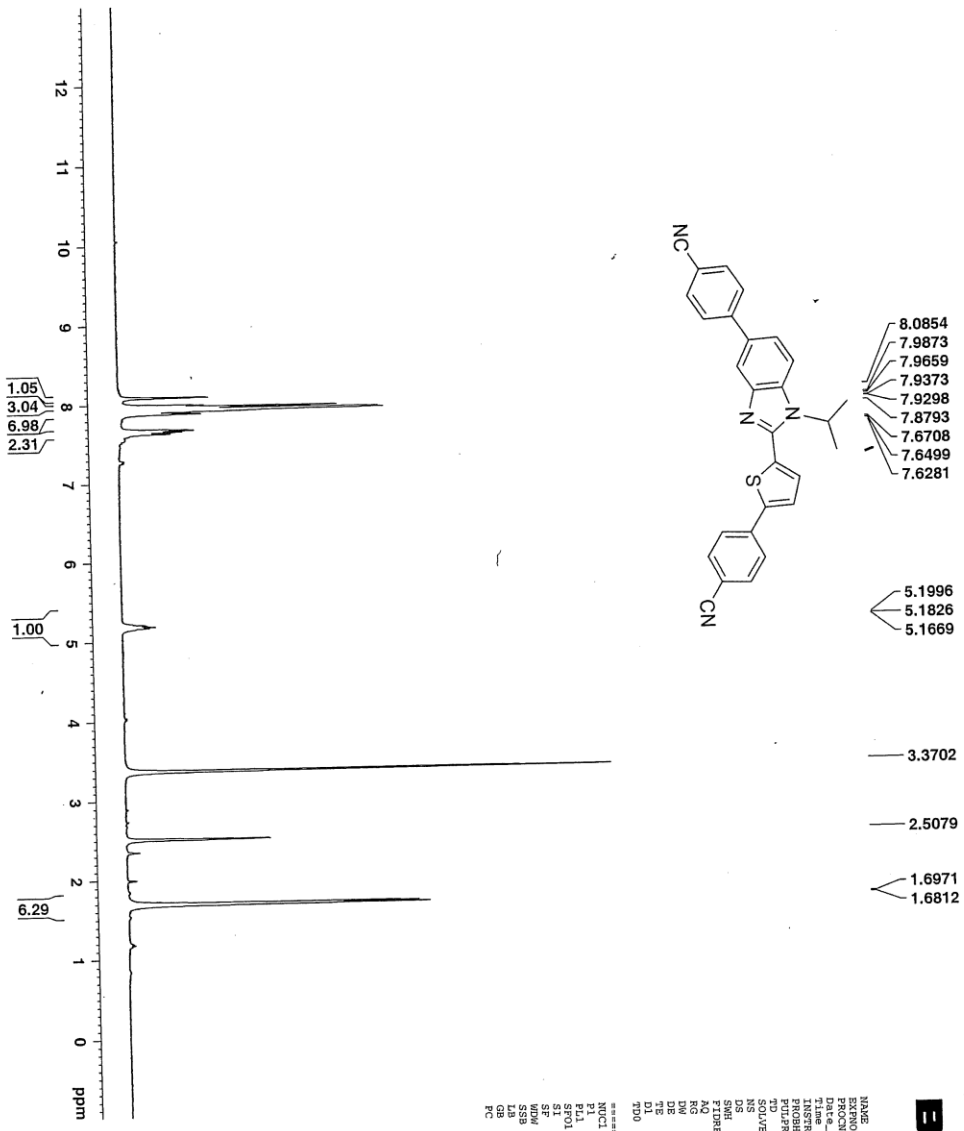

```

NAME      CN-Ph-S1-Isopropyl-Phthalazine-Ph-CN
EXPNO     1
PROCNO    1
Date_     20170821
Date      13.54
INSTRUM   spect
PROBHD    5 mm PABBO BH-
PULPROG   zgpg30
TD         65536
SOLVENT   DMSO
NS         2
DS         2
SWH        5992.841 Hz
FIDRES     0.0822410 sec
AQ         5.8391181 sec
RG         89.400 us/sec
DE         25.3 K
TE         300.2 K
D1         1.00000000 sec
TD0        1

===== CHANNEL f1 =====
NUC1      1H
P1         6.18 us/sec
PL1        0.00 dB
SFO1      400.1324008 MHz
SI         32
WDW        EM
SSB        0
GB         0
PC         1.00
  
```

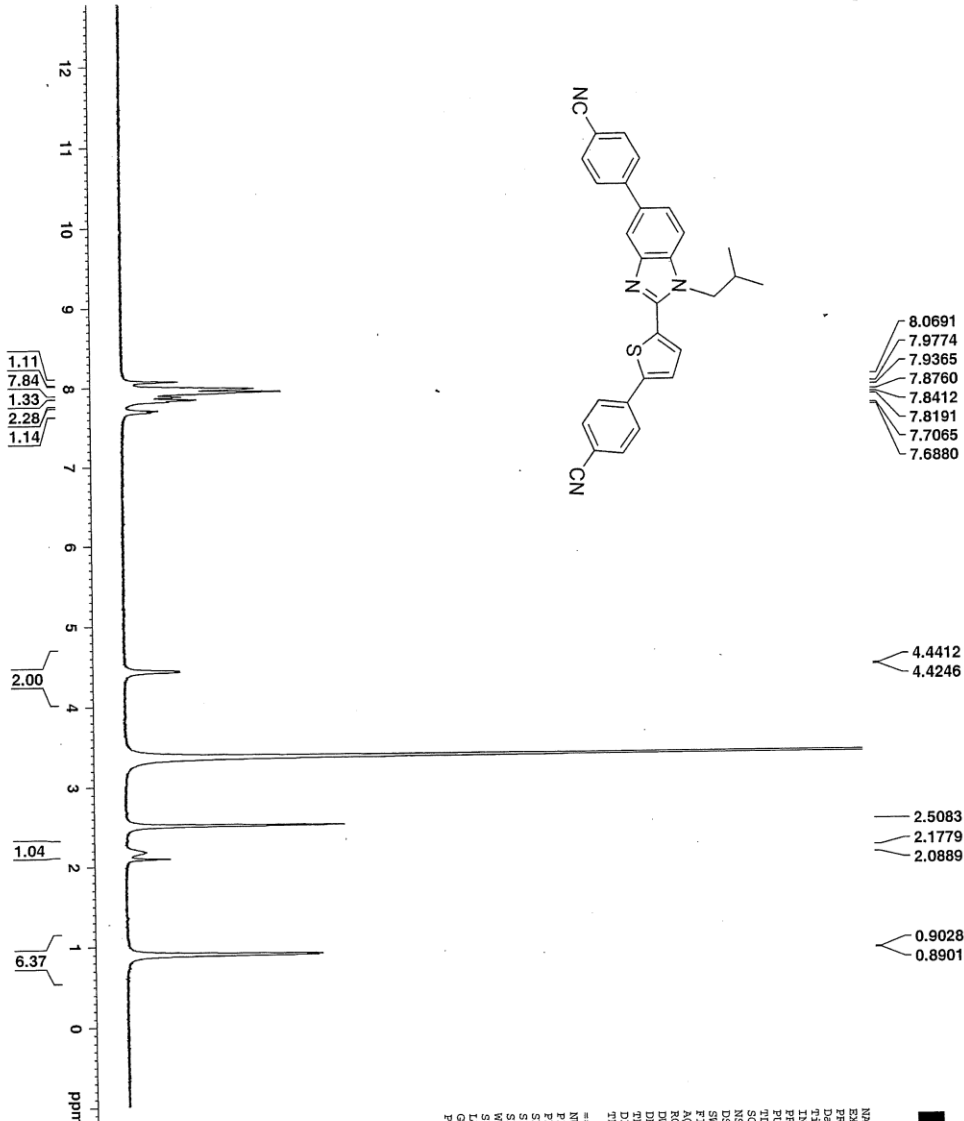

8.0691  
7.9774  
7.9365  
7.8760  
7.8412  
7.8191  
7.7065  
7.6880

4.4412  
4.4246

2.5083  
2.1779  
2.0889

0.9028  
0.8901

1.11  
7.84  
1.33  
2.28  
1.14

2.00

1.04

6.37

ppm

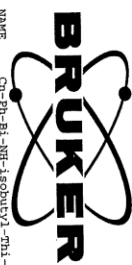

```

NAME CN-Ph-BI-NH-1300uW1-TH1-Ph-CN
EXNO 1
PROCNO 1
Date 20170815
Time 17:42:58
INSTRUM spect
PROBHD 5 mm PABBO BB-
PULPROG zg30
TD 65536
SOLVENT DMF2
DS 2
SWH 5592.841 Hz
FIDRES 0.085340 Hz
AQ 3.828932 sec
RG 89.400 usec
DE 6.00 usec
TE 295.4 K
D1 1.00000000 sec
T30 1
===== CHANNEL f1 =====
NUC1 13C
P1 6.41 usec
PL 0.00 dB
SFO1 400.1324008 MHz
SI 32768
SF 400.1300000 MHz
WDW EM
SSB 0
LB 0.30 Hz
GB 0
PC 1.00
  
```

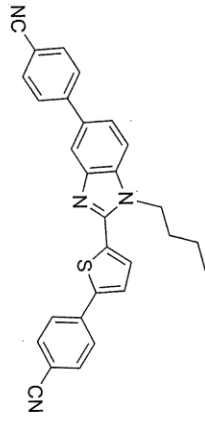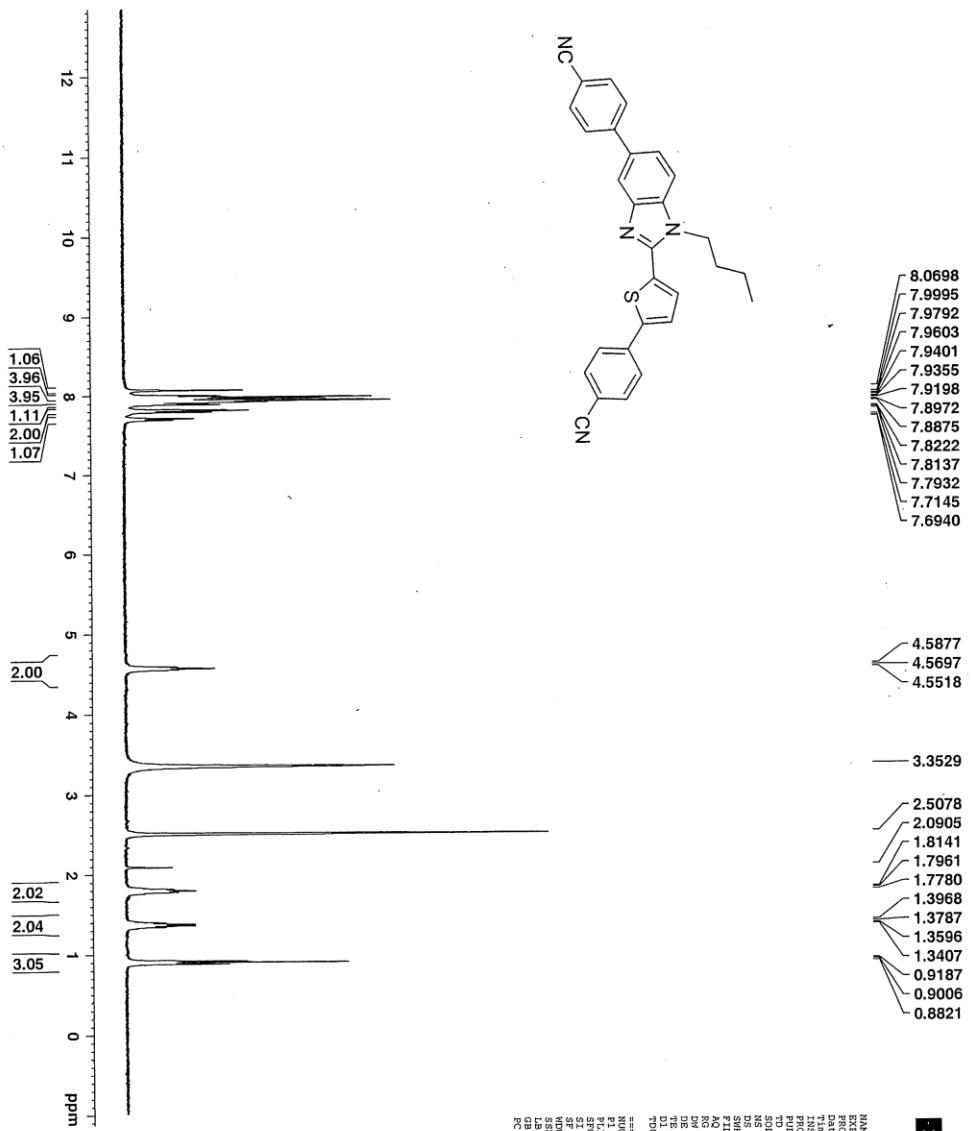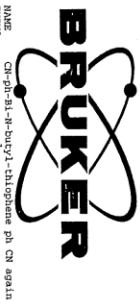

NAME CH-dp-BI-N-butyl-chlophane pn CN 9941n  
 EXNO 1  
 Date 2017905  
 Time 12.21  
 PULPROG zgpg30  
 PROBR0 5 mm PABBO BB-  
 P0 6320  
 SOLVENT DMSO  
 NS 4  
 SI 0  
 SFR 5592.841 Hz  
 F2 0.063260 sec  
 RG 322.5  
 DI 69.400 uSAC  
 DE 237.1 K  
 TR 1.0000000 sec  
 DQ  
 ===== CHANNEL f1 =====  
 NUC1 1H  
 P1 6.40 uSAC  
 SFO1 400.134008 MHz  
 SI 32768  
 WDW EM  
 SSB 0.30 Hz  
 CB 0  
 PC 1.00

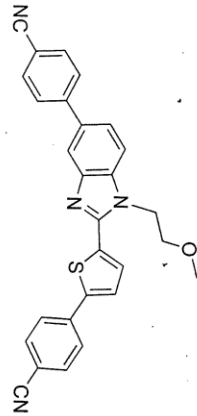

- 8.0545
- 7.9216
- 7.7105
- 4.5915
- 3.3628
- 3.2269
- 2.5100
- 2.0636

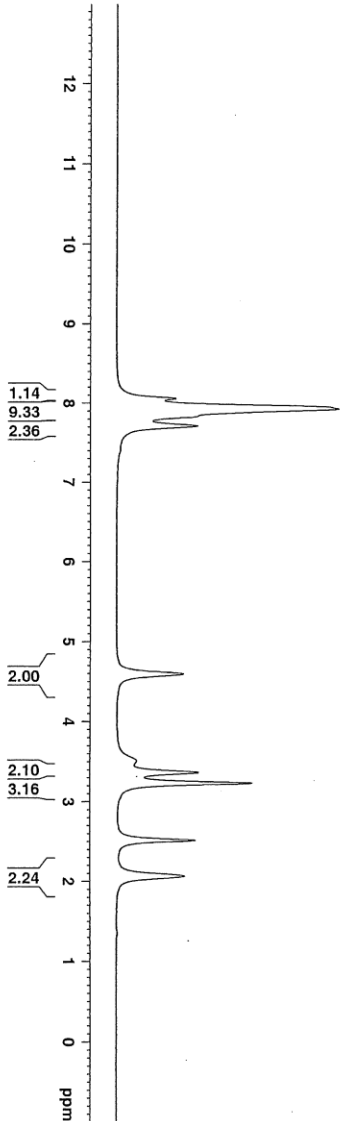

NAME: Cn-3h-3h-pip(2p)-lanthony-thiothene-flu-Cr-481h  
 PROCNO: 1  
 DATE\_: 2011045  
 TIME: 11:05  
 INSTRUM: spect  
 PULPROG: zgpg30  
 F2 - F1: 500.130000 MHz  
 SOLVENT: dms-d6  
 NS: 512  
 DS: 4  
 SWH: 500.130000 MHz  
 AQ: 5.853461 sec  
 FIDRES: 0.1000000000  
 DM: 89.4100 sec  
 DE: 236.9 K  
 TE: 300.2 K  
 TD: 1,000,000,000  
 T1: 1.0000000000 sec  
 T2: 1.0000000000 sec

===== CHANNEL f1 =====  
 NUCL1: 13C  
 P1: 6.00  
 PL1: 0.00  
 SFO1: 400.130000 MHz  
 ZGPG: 13C  
 SFO2: 400.130000 MHz  
 ZGPG2: 13C  
 SFO3: 0.00  
 ZGPG3: 13C  
 SFO4: 0.00  
 ZGPG4: 13C

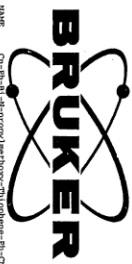

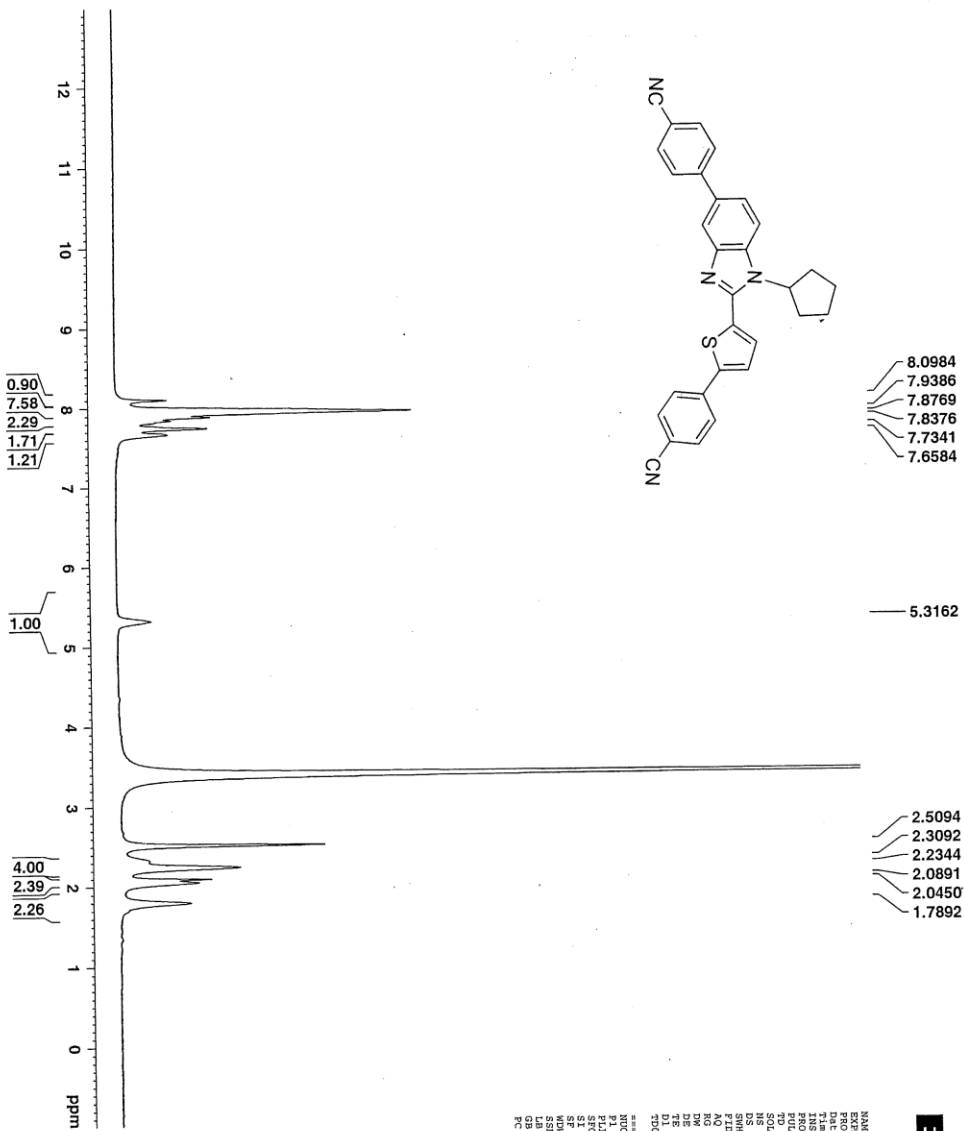

**BRUKER**

NAME: c1ccc(cc1)-c2nc3c(cc2)sc(c3)C4CCCC4  
 EXPNO: 1  
 PROCNO: 20170823  
 Time: 14.38  
 INSTRUM: spect  
 PULPROG: zgpg30  
 TOUJUNT: 50  
 DS: 512, 841 Hz  
 FIDRES: 0.005340 Hz  
 AQ: 5.858183 sec  
 DV: 89.400 usec  
 DE: 28.09 K  
 DI: 1.0000000 sec  
 TD0: 1

===== CHANNEL f1 =====  
 NU1: 6.40 usec  
 PL1: 0.00 dB  
 SFO1: 400.132788 MHz  
 SF: 400.132788 MHz  
 SF: 400.130000 MHz  
 NSB: 0  
 LB: 0.30 Hz  
 GB: 0  
 PC: 1.00

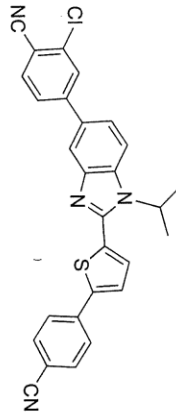

8.1384  
8.1112  
8.0225  
8.0021  
7.9486  
7.9191  
7.8636  
7.6586

5.1928  
5.1779

3.4298

2.5095  
2.0875  
1.7416  
1.6903  
1.6755

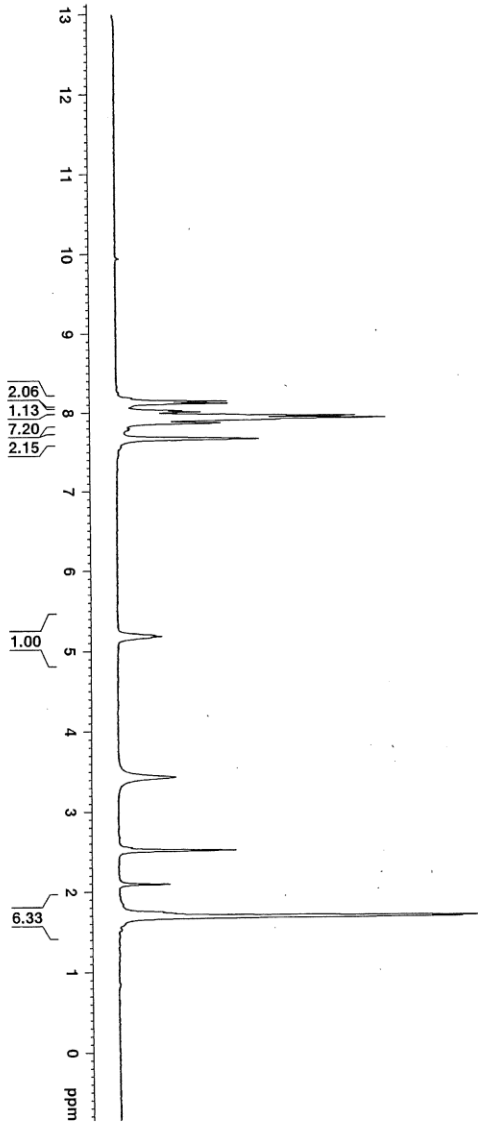

BRUKER

NAME: CN-Cl-pp-BI-4-IPROXY-7-Methoxy-Ph-CN  
 PROCNO: 1  
 F2: 20180114  
 Time: 8:14  
 INSTRUM: 5 mm PABBO  
 PULPROG: zgpg30  
 FOLDS: 4  
 SFO: 400.1300000 MHz  
 AQ: 0.330 Hz  
 RG: 1.0000000  
 TD: 65536  
 SFO2: 500.1300000 MHz  
 FIDRES: 0.0000000 Hz  
 AQ2: 0.330 Hz  
 RG2: 1.0000000  
 TD2: 65536  
 SFO3: 400.1300000 MHz  
 FIDRES3: 0.0000000 Hz  
 AQ3: 0.330 Hz  
 RG3: 1.0000000  
 TD3: 65536  
 ===== CHANNEL f1 =====  
 NUC1: 13C  
 P1: 6.00 usec  
 PL1: 0.00 dB  
 SFO1: 400.1300000 MHz  
 SF: 400.1300000 MHz  
 SWH: 40000.000 MHz  
 FREQ: 400.1300000 MHz  
 LG: 0.330 Hz  
 RBW: 0.330 Hz  
 PC: 1.00



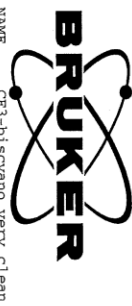

CP3-biscyano Very Clean

NAME  
EXPNO 1  
PROCNO 1  
Date\_ 20180417  
Time 13:29  
INSTRUM spect  
PROBHD 5 mm PABBO BB-  
PULPROG zg30  
TD 65536  
SOLVENT DMSO  
NS 4  
DS 2  
SWH 5592.841 Hz  
FIDERS 0.085340 Hz  
AQ 5.858982 sec  
RG 220 usec  
DM 89.400 usec  
DE 400 usec  
TE 297.0 K  
TD 1.00000000 sec  
TDO 1

===== CHANNEL f1 =====  
NUC1 1H  
PI 6.40 usec  
PL 0.00 dB  
SFO1 400.1324008 MHz  
SI 32768  
SF 400.1300000 MHz  
WDW EM  
SSB 0  
LB 0.30 Hz  
GB 0  
PC 1.00

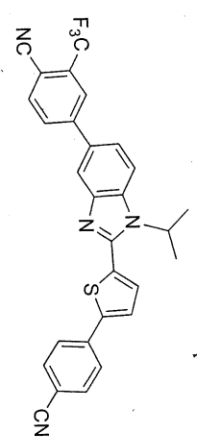

- 8.3005
- 8.2733
- 8.2544
- 8.2325
- 7.9786
- 7.9447
- 7.9240
- 7.9001
- 7.8911
- 7.7595
- 7.7385
- 7.6996
- 7.6912
- 5.2178
- 5.2012
- 5.1830
- 3.3452
- 2.5092
- 1.7613
- 1.7432
- 1.7156
- 1.6988

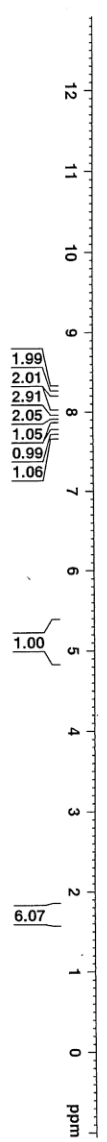

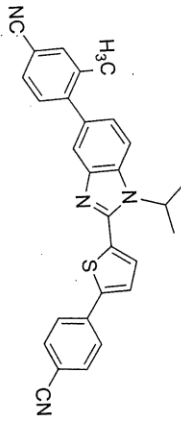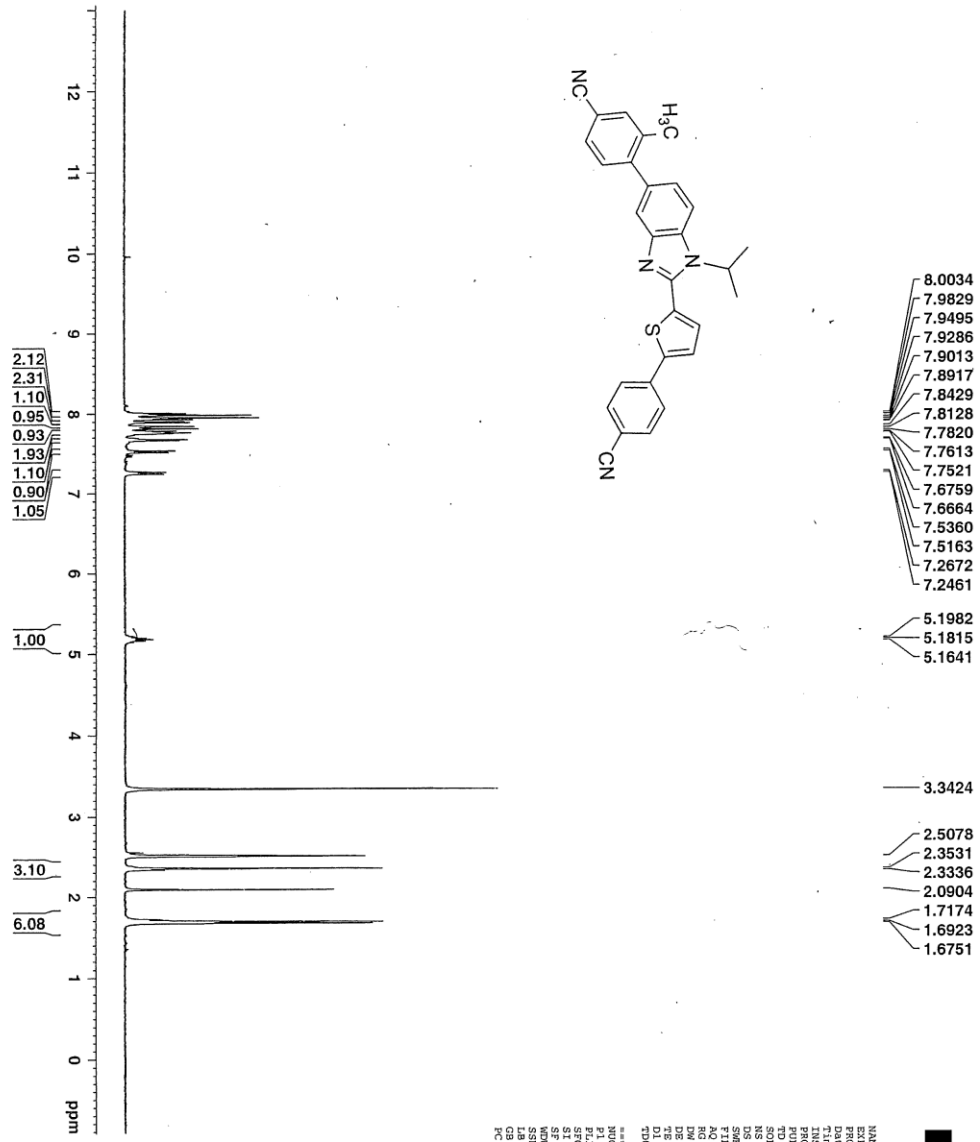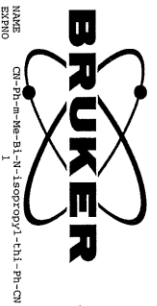

```

NAME          CN-Pr-m-Me-BI-N-Isopropyl-1H-Pr-CN
EXPNO         1
PROCNO        1
Date_         20180130
Time          8.43
INSTRUM       5 mm PABBO
PROBHD        zgpg30
PULPROG       zg30
TD            65536
SOLVENT       CDCl3
NS            4
DS            2
AQ            5.653844 Hz
SFORES        0.085340 Hz
RG            89
AQ            3.62 usec
DE            5.9589683 sec
TE            296.4 K
F2            1.00000001 sec
TD0
===== CHANNEL f1 =====
NUC1           13C
P1            6.40 usec
PL1           0.00 dB
SFO1          400.1132000 MHz
SI            32768
SF            400.1300000 MHz
WDW            EM
SSB            0
RG            89
AQ            0.30 Hz
LB            0
GB            1.00
  
```





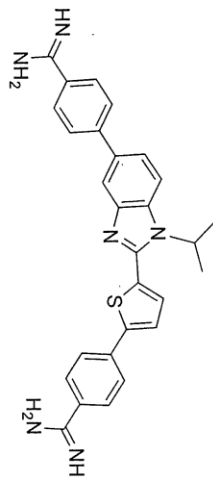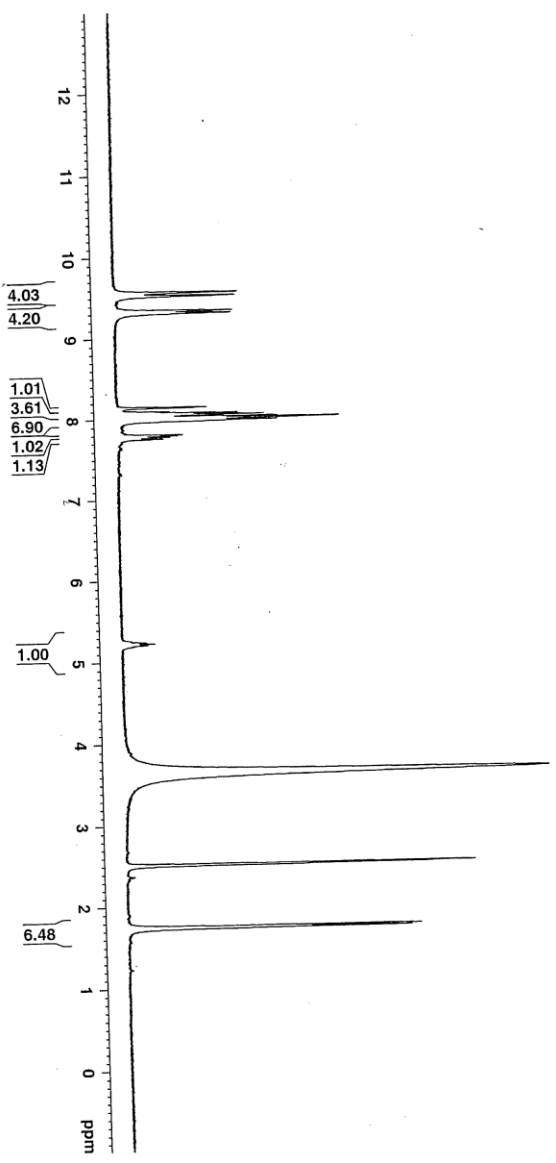

- 9.5613
- 9.5196
- 9.3348
- 9.3056
- 8.1392
- 8.0868
- 8.0681
- 8.0478
- 8.0205
- 8.0025
- 7.9776
- 7.7992
- 7.7913
- 7.7722
- 7.7510
  
- 5.2377
- 5.2212
- 5.2035
  
- 3.6442
  
- 2.5078
  
- 1.7428
- 1.7265

BRUKER  
 spectrometer  
 20170807  
 5 mm BBOBO-400  
 400.130000 MHz  
 DMSO-d6  
 298.2 K  
 1.00000000 sec  
 1.00

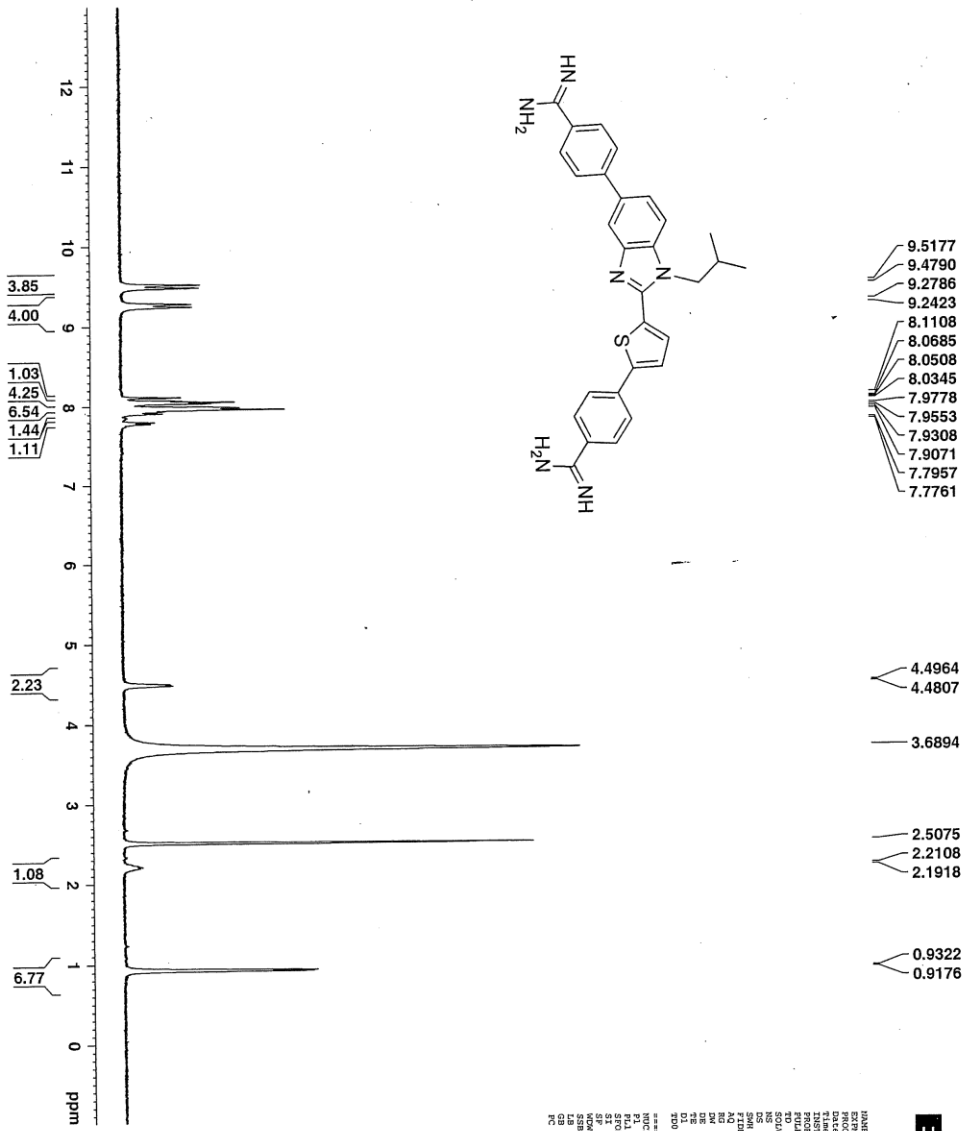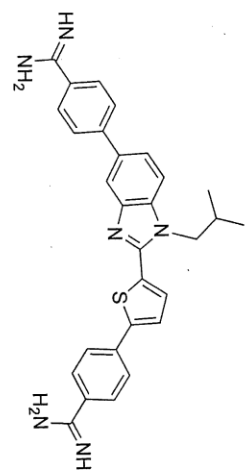

NAME: *N*-acetyl-*trans*-*N*-(*tert*-butyl)-*trans*-*N*-methyl-*N*-phenyl-*N*-valerine  
 EXPNO: 1  
 F2 - Acq: 20170818  
 Date\_UTC: 18.08.17  
 Time: 10.11.3  
 PROCNO: 1  
 PROBHD: 5 mm BBOBO-8H-1  
 PULPROG: zgpg30  
 TD: 65536  
 TO: 0.00000001  
 SOLVENT: DMSO  
 NS: 512  
 DS: 4  
 SWH: 532.842 Hz  
 FWHM: 0.082140 Hz  
 AQ: 0.00000000 sec  
 RG: 512  
 INJ: 1  
 DE: 1.00000001  
 PC: 1.00

===== CHANNEL f1 =====  
 NUC1: 13C  
 P1: 6.00  
 PL1: 0.00 dB  
 F1: 400.1124000 MHz  
 SFO1: 400.1124000 MHz  
 SF: 400.1124000 MHz  
 AF: 0.00 MHz  
 SSB: 0.00 Hz  
 GB: 0.00 Hz  
 PC: 1.00

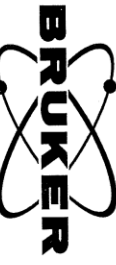

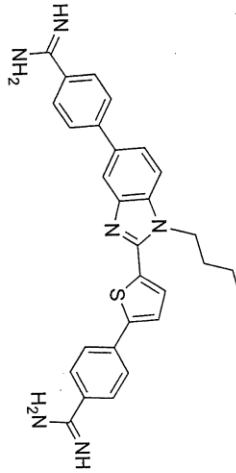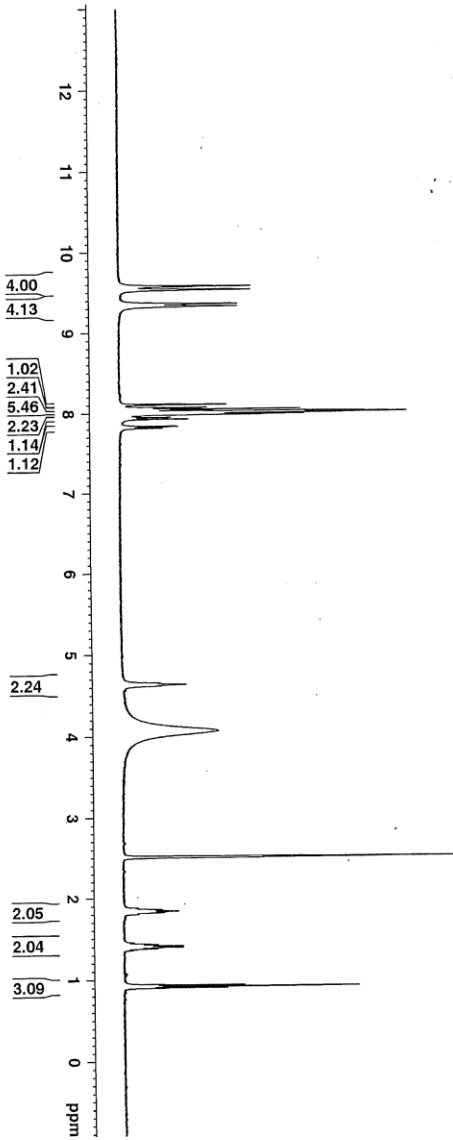

- 9.5762
- 9.5329
- 9.3583
- 9.3282
- 8.1081
- 8.0680
- 8.0467
- 8.0202
- 8.0096
- 8.0038
- 7.9884
- 7.9815
- 7.9475
- 7.9259
- 7.8333
- 7.8144

- 4.6515
- 4.6341
- 4.6166
- 4.0637

- 2.5116
- 2.5077
- 1.8576
- 1.8399
- 1.8211
- 1.4317
- 1.4130
- 1.3939
- 1.3758
- 0.9352
- 0.9170
- 0.8986

NAME: aaldine-Pr-Bi-Pr-butyl-Phenyl-Thiophene-Pr-aaldine  
 PROCNO: 20174921  
 DATE\_: 10-20  
 TIME\_: 10:40  
 INSTRUM: spect  
 PULPROG: zgpg30  
 F2: 400.1300000 MHz  
 F1: 400.1300000 MHz  
 TO: 65536  
 TD: 65536  
 SFO: 4  
 SI: 4  
 SF: 5992.841 Hz  
 FIDRES: 0.084840 Hz  
 AQ: 0.00010000 sec  
 RG: 3281.1  
 ACQ: 89.600 usec  
 PC: 256.8 K  
 RE: 1.000000001 sec  
 TDO: 1.000000001 sec

\*\*\*\*\* CHANNEL F1 \*\*\*\*\*  
 NUC1: 1H uspec  
 P1: 6.40 usec  
 PL1: 0.00 dB  
 SFO1: 400.1300000 MHz  
 SF: 400.1300000 MHz  
 AF: 0  
 SFO2: 0.130 MHz  
 LB: 1.00  
 PC: 1.00

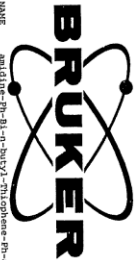

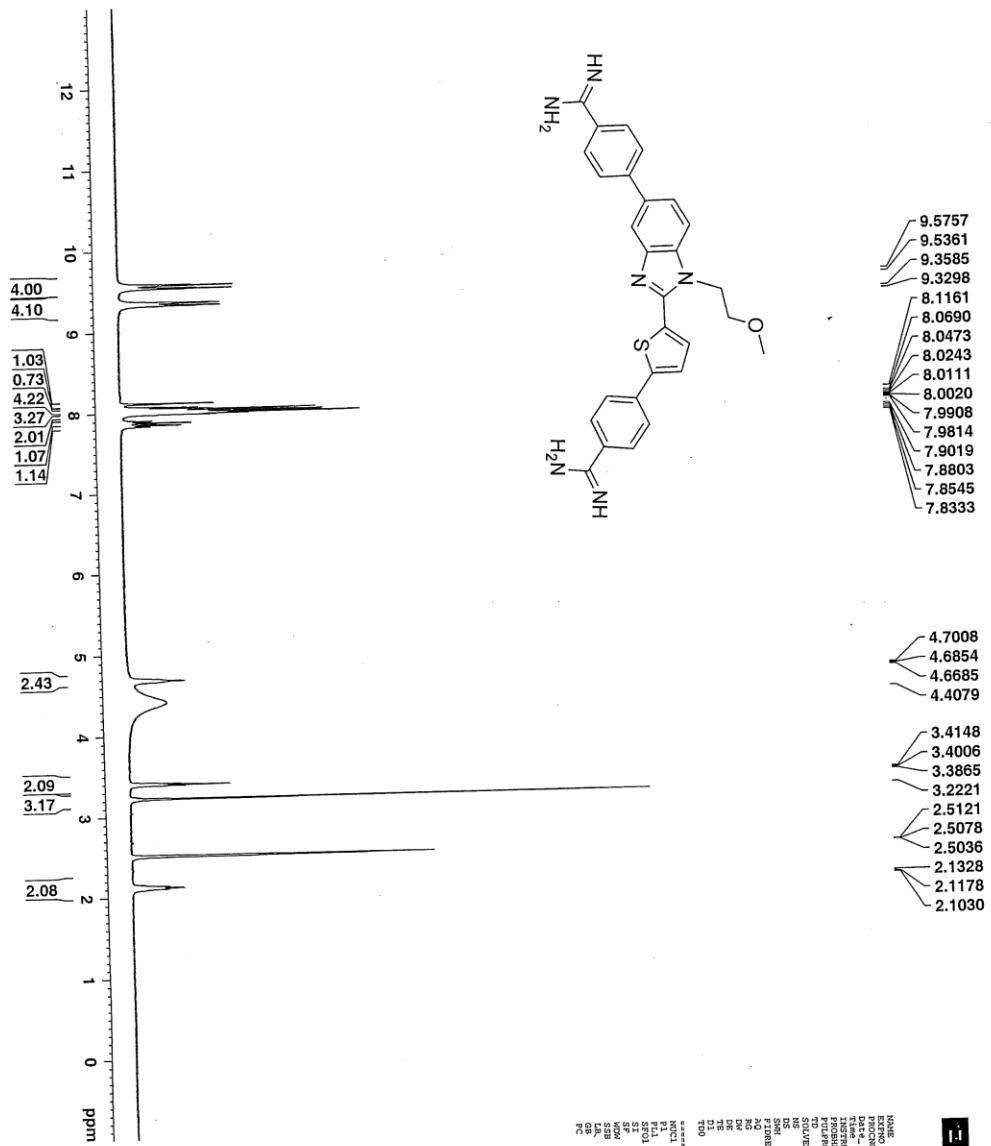

**BRUKER**

NAME: N-(4-(aminomethyl)phenyl)-2-(4-aminophenyl)benzimidazole-5-propylamine  
 EXPNO: 1  
 PROCNO: 2011103  
 F1: 12.35  
 F2: 12.35  
 F3: 12.35  
 INSTRUM: spect  
 PROBHD: 5 mm PABBO-5B1  
 PULPROG: zgpg30  
 TD: 65536  
 SFO: 400.132408  
 SOLVENT: DMSO  
 DS: 2  
 SWH: 5103.42 Hz  
 FWHM: 0.081346 Hz  
 CHRG1: 1  
 CHRG2: 2  
 CHRG3: 3  
 AQ: 5.85589492 sec  
 RM: 89.400 usec  
 DE: 25.52 K  
 TE: 300.2 K  
 D1: 1.00000000 sec  
 D10: 1.00000000 sec  
 =====  
 CHANNEL f1  
 NUC1: 1H  
 P1: 12.00 usec  
 PL1: 0.00 dB  
 SFO1: 400.132408 MHz  
 SF: 400.132408 MHz  
 WDC: 0 Hz  
 WCN: 0  
 LB: 0.30 Hz  
 GB: 0 Hz  
 PC: 1.00



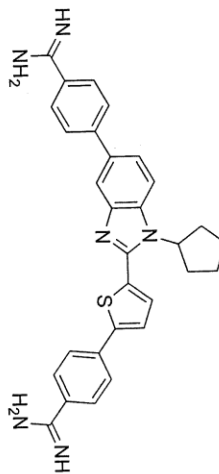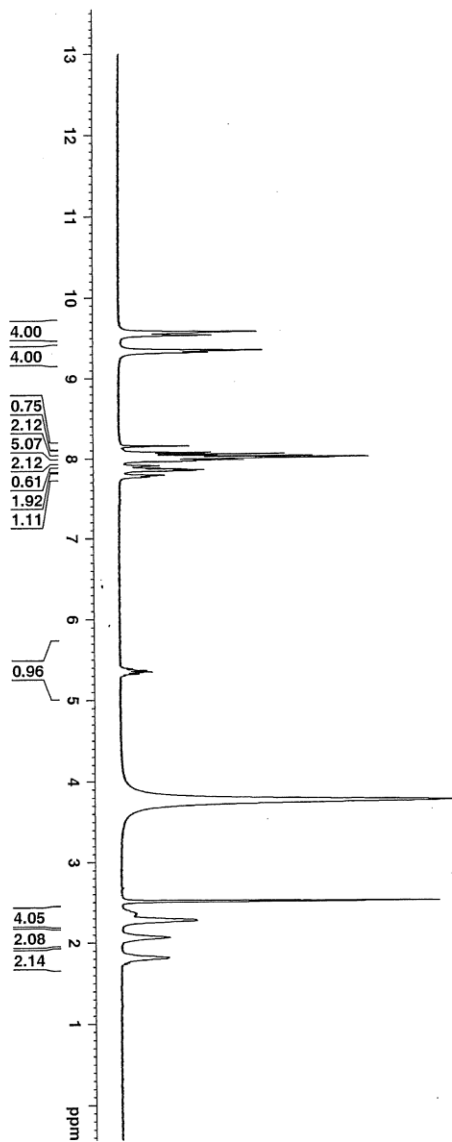

- 9.5745
- 9.5333
- 9.3455
- 9.3198
- 8.1532
- 8.1503
- 8.0726
- 8.0514
- 8.0274
- 8.0118
- 8.0084
- 8.0018
- 7.9800
- 7.9730
- 7.9630
- 7.9072
- 7.8991
- 7.8776
- 7.8650
- 7.8578
- 7.8479
- 7.7899
- 7.7719
- 7.7679
- 5.3670
- 5.3462
- 5.3244
- 3.7593
- 2.5117
- 2.5076
- 2.5035
- 2.2672
- 2.0608
- 1.8125

NAME: analidine-7H, -8L, -9E-9Z-isomers-1-tilioleone-7H-analidine  
 PROCNO: 20170711  
 F2: 1  
 TIME: 16.07  
 INSTRUM: spect  
 PROBHD: 5 mm RABBIT  
 PULPROG: zgpg30  
 F1F4: 62.50  
 SOLVENT: DMSO  
 NS: 6576  
 DS: 4  
 SWH: 6576.042 Hz  
 FIDRES: 0.083340 Hz  
 AQ: 3.58194812 sec  
 RG: 327.5  
 DD: 8.400 umic  
 DE: 255.1 Hz  
 TE: 300.2 K  
 TD0: 1.000000000  
 ===== CHANNEL f1 =====  
 P1: 6.40 umic  
 PL1: 0.00 dB  
 SFO1: 400.1326098 MHz  
 SI: 32  
 SF: 400.1326098 MHz  
 SCN: 220  
 XCN: 20  
 YCN: 20  
 ZCN: 20  
 ELN: 0.30 Hz  
 EN: 1.00

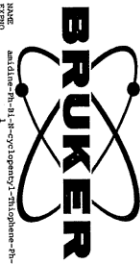

NAME: amide-ClH<sub>2</sub>-HIS(Pro)-Thioguan-Py-aldine  
 RUNCID: 20180111  
 TIME: 7.121  
 PROBHD: 5 mm PABO 5HC  
 PULPROG: zgpg30  
 ACQ: 6312  
 SOLVENT: DMSO  
 NS: 550, 4.00 Hz  
 DS: 2  
 FIDRES: 0.0883140 Hz  
 AQ: 1.26892355 sec  
 RG: 3275  
 RW: 4.00 us/pt  
 TD: 65536  
 TE: 300.2 K  
 T1: 1.00000000 sec  
 T2: 1  
 T3: 1  
 T4: 1  
 T5: 1  
 T6: 1  
 T7: 1  
 T8: 1  
 T9: 1  
 T10: 1  
 \*\*\*\*\* CHANNEL f1 \*\*\*\*\*  
 P1: 6.40 us/pt  
 PL1: 0.00 dB  
 PR1: 400.1326088 MHz  
 FREQ1: 400.1326088 MHz  
 SI: 32  
 SZ: 409.1326088 MHz  
 U1: 0.00000000 Hz  
 U2: 0.10 Hz  
 U3: 1.00 Hz

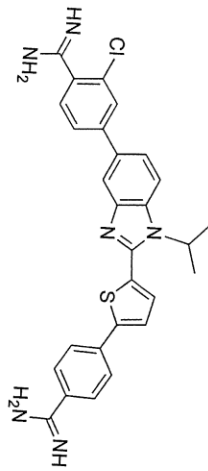

- 9.6011
- 9.5575
- 9.3360
- 8.1472
- 8.0962
- 8.0756
- 8.0537
- 8.0012
- 7.9867
- 7.9788
- 7.9611
- 7.9407
- 7.8197
- 7.8100
- 7.7847
- 7.7767
- 7.7646
- 7.7552
- 5.2433
- 5.2262
- 5.2085
- 3.9455
- 2.5077
- 1.7468
- 1.7297

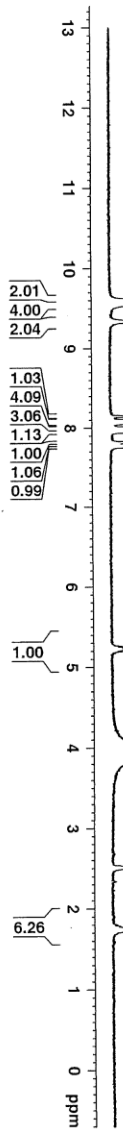

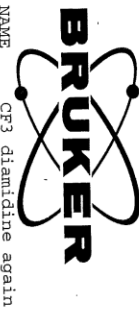

CP3 diamidine again

```

NAME
EXPNO 1
PROCNO 1
PROCNO 20180419
Date_ 11.24
Time 11.24
INSTRUM spect
PROBHD 5 mm PABBO BB-
PULPROG zg30
TD 65536
SOLVENT DMSO
NS 4
DS 2
SWH 5592.841 Hz
FIDRES 0.085340 Hz
AQ 5.8589683 sec
RG 228.1
DW 89.400 usec
DE 6.00 usec
TE 297.1 K
D1 1.00000000 sec
TD0 1
  
```

```

===== CHANNEL f1 =====
NUC1 1H
P1 6.40 usec
PL1 0.00 dB
SF01 400.1324008 MHz
SI 32768
SF 400.1300000 MHz
WDW EM
SSB 0
LB 0.30 Hz
GB 0
PC 1.00
  
```

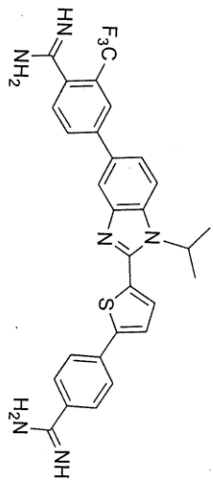

- 9.6852
- 9.6345
- 9.4195
- 8.2965
- 8.2767
- 8.2163
- 8.1717
- 8.1503
- 8.0790
- 8.0587
- 8.0336
- 8.0135
- 7.9108
- 7.8883
- 7.8614
- 7.8392
  
- 5.2595
- 5.2427
- 5.2262
  
- 4.4370
  
- 2.5092
  
- 1.7965
- 1.7642
- 1.7477

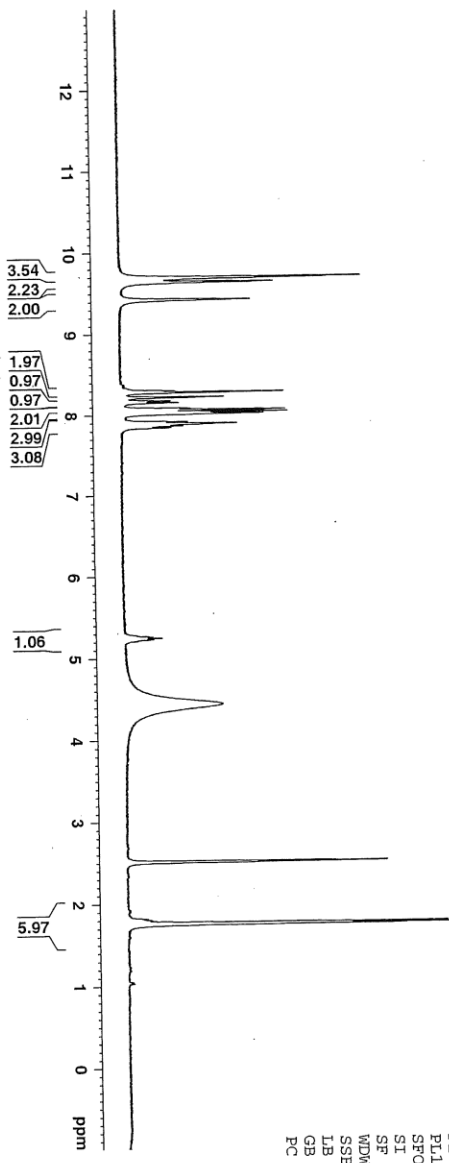

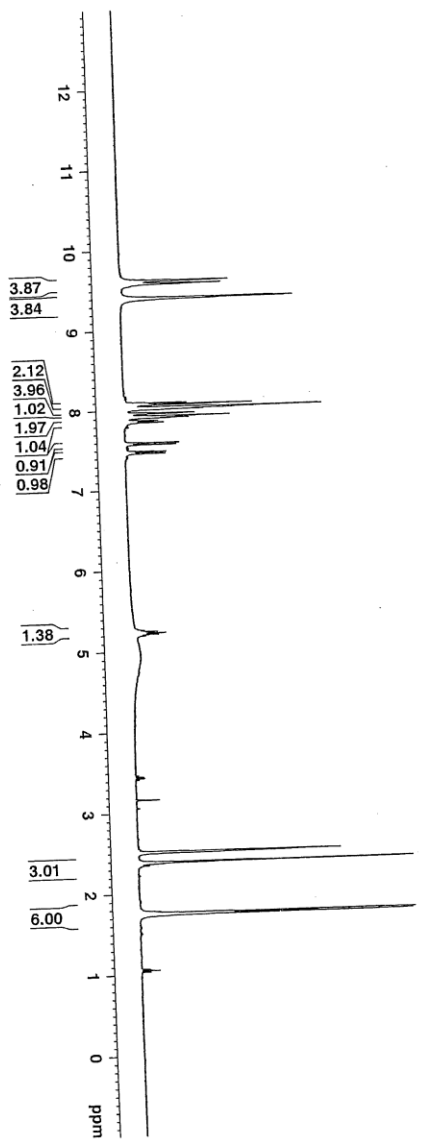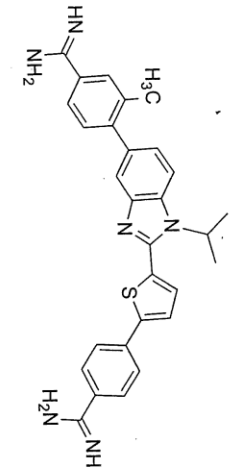

- 9.6181
- 9.5812
- 9.4028
- 8.0900
- 8.0690
- 8.0306
- 8.0105
- 7.9595
- 7.9243
- 7.9147
- 7.9036
- 7.8703
- 7.8505
- 7.5917
- 7.5716
- 7.4836
- 7.4618
  
- 5.2460
- 5.2288
- 5.2116
  
- 3.1649
  
- 2.5076
- 2.3848
- 2.3689
- 1.7761
- 1.7351

NAME: methyl-2-methyl-4-(4-aminophenyl)-5-(4-aminophenyl)thiazole  
 EXPNO: 1  
 PROCNO: 1  
 Date\_je: 20130901  
 Time: 11.40  
 INSTRUM: spect  
 PROBHD: 5 mm BBO  
 PULPROG: zgpg30  
 F2: 400.130000  
 SOLVENT: DMSO  
 NS: 2  
 DS: 2  
 SWH: 5321.841 Hz  
 FIDRES: 0.230000 Hz  
 AQ: 5.1855681 sec  
 RG: 63.400  
 DQ: 24.000  
 SFO: 400.130000 MHz  
 DE: 24.000  
 TE: 300.2 K  
 D1: 1.00000000 sec  
 TDO: 0.00000000 sec  
 ANTCYCLE: CHANNEL f1 1H  
 P1: 6.00  
 PL1: 0.00 dB  
 SFO1: 400.130000 MHz  
 SI: 4  
 SF: 400.130000 MHz  
 ACQ: 0  
 PC: 0.30 MHz  
 PC: 1.00

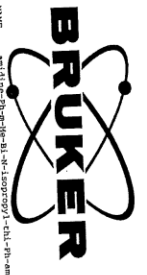

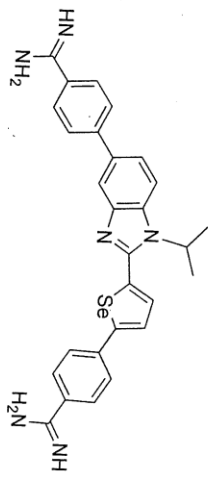

- 9.5687
- 9.5328
- 9.3404
- 9.3221
- 8.1501
- 8.1184
- 8.0960
- 8.0464
- 8.0255
- 8.0064
- 7.9801
- 7.9626
- 7.8015
- 7.7805
  
- 5.2070
- 5.1908
- 5.1754
  
- 3.7573
  
- 2.5075
  
- 1.7414
- 1.7256

NAME: Amidine-Ph-H-Isopropyl-Selenophene-Ph-aldine  
 PREPNO: 20170811  
 TIME: 10.18  
 INSTRUM: 5 mm PABBO-CP-1  
 PULPROG: zgpg30  
 F2: 400.130000  
 ACQ: 400.130000  
 SOLVENT: DMSO  
 NS: 2  
 DS: 2  
 ST: 2  
 FID: 0.045000 Hz  
 SFO: 5.85894992 sec  
 AQ: 89.400000 sec  
 RG: 320.000000  
 TE: 300.2 K  
 TD: 1.000000000  
 ===== CHANNEL f1 =====  
 NUC1: 13C  
 P1: 6.10 usec  
 PL1: 0.00 dB  
 FREQ1: 400.130000 MHz  
 SFO1: 400.130000 MHz  
 WID1: 400.130000 MHz  
 SSB: 0  
 DB: 0 Hz  
 PC: 1.00

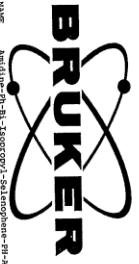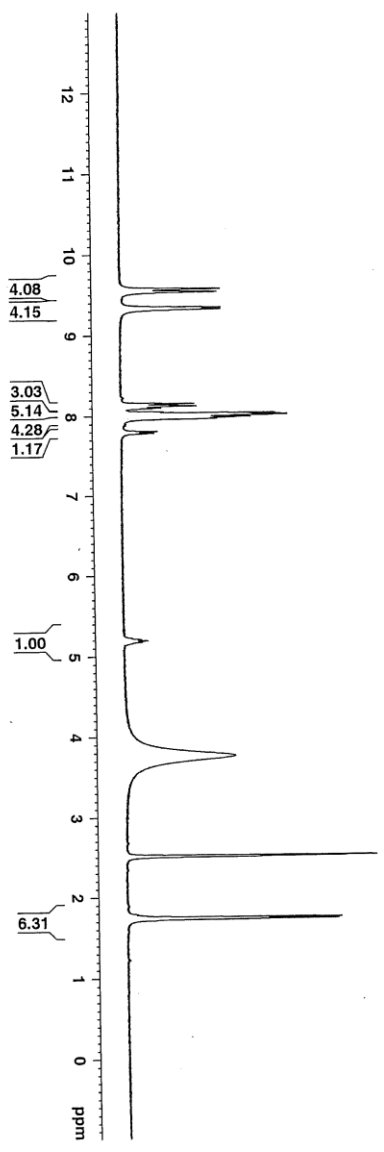

Supplement: NIHMS1007885-supplement-supplemental.pdf [file NIHMS1007885-supplement-supplemental.pdf]
